# Supplementary material for: Synthesis of functionalized tetrahydrodibenzo[b,g][1,8]naphthyridin-1(2H)-ones through base-promoted annulation of quinoline-derived dipolarophiles and cyclic enaminones
Source: Royal Society of Chemistry journal article supplement (doi:10.1039/d3ob01547e), 2023-01-01

**Synthesis of Functionalized Tetrahydrodibenzo[*b,g*] [1,8]naphthyridin-1(2*H*)-  
ones through Base-promoted Annulation of Quinoline Derived Dipolarophile  
and Cyclic Enaminones**

Wenjun Luo\*, Xinghua Zheng, Fanglian Zhang, Qiuya Luo, Wen-Ting Deng, Lipeng  
Long, Daohong Yu, Zhong-Xia Wang, Zhengwang Chen\*

Key Laboratory of Organo-Pharmaceutical Chemistry of Jiangxi Province, Gannan  
Normal University, Ganzhou 341000, P.R. China

**Contents**

|                                                                                                         |            |
|---------------------------------------------------------------------------------------------------------|------------|
| <b>1. 3-(2-chloroquinolin-3-yl)-1-phenylprop-2-en-1-one 1a<br/>with linear enamine esters 2a' react</b> | <b>S2</b>  |
| <b>2. Transformations of the product 3q</b>                                                             | <b>S3</b>  |
| <b>3. Characterization of 3</b>                                                                         | <b>S5</b>  |
| <b>4. X-ray of 4</b>                                                                                    | <b>S26</b> |
| <b>5. NMR Spectra</b>                                                                                   | <b>S35</b> |

1. 3-(2-chloroquinolin-3-yl)-1-phenylprop-2-en-1-one **1a** with linear enamine esters **2a'** react

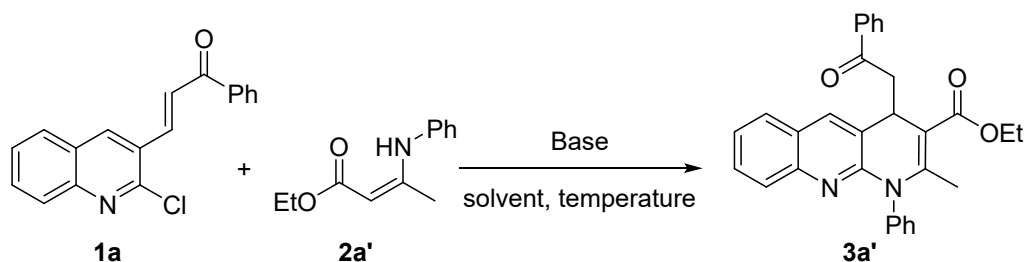

| Entry    | Base                            | Solvent                 | Temp(°C)  | Yield(%)  |
|----------|---------------------------------|-------------------------|-----------|-----------|
| 1        | Cs <sub>2</sub> CO <sub>3</sub> | CH <sub>3</sub> CN      | 80        | 22        |
| 2        | NaOH                            | CH <sub>3</sub> CN      | 80        | 23        |
| <b>3</b> | <b>KOH</b>                      | <b>CH<sub>3</sub>CN</b> | <b>80</b> | <b>30</b> |
| 4        | <i>t</i> -BuOK                  | CH <sub>3</sub> CN      | 80        | 23        |
| 5        | NaOtBu                          | CH <sub>3</sub> CN      | 80        | 24        |
| 6        | <i>t</i> -BuOK                  | CH <sub>3</sub> CN      | 80        | 20        |
| 7        | <i>t</i> -BuOK                  | THF                     | reflux    | 23        |
| 8        | KOH                             | DMSO                    | 80        | 20        |

**Ethyl 2-methyl-4-(2-oxo-2-phenylethyl)-1-phenyl-1,4-dihydrobenzo[b][1,8]naphthyridine-3-carboxylate (3a')**. 30% yield, red oily, <sup>1</sup>H NMR (400 MHz, CDCl<sub>3</sub>): δ 7.96-7.89 (m, 3H), 7.66-7.59 (m, 1H), 7.56-7.46 (m, 5H), 7.46-7.34 (m, 5H), 7.30-7.24 (m, 1H), 4.96 (dd, *J* = 8.6, 4.0 Hz, 1H), 4.24 (tdd, *J* = 10.8, 7.2, 3.6 Hz, 2H), 3.37 (qd, *J* = 15.6, 6.4 Hz, 2H), 2.22 (s, 3H), 1.32 (t, *J* = 7.2 Hz, 3H). <sup>13</sup>C NMR (100 MHz, CDCl<sub>3</sub>): δ 200.7, 198.0, 167.3, 151.4, 150.9, 145.8, 140.0, 137.1, 136.0, 133.0, 130.6, 129.0, 128.9, 128.5, 128.1, 128.0, 127.9, 127.0, 126.3, 124.1, 122.0, 102.6, 60.0, 47.0, 34.7, 19.4, 14.4. HRMS (ESI) *m/z* calculated for C<sub>30</sub>H<sub>27</sub>N<sub>2</sub>O<sub>3</sub> [M+H]<sup>+</sup> = 463.2016, found = 463.2018.

## 2. Transformations of the product 3q

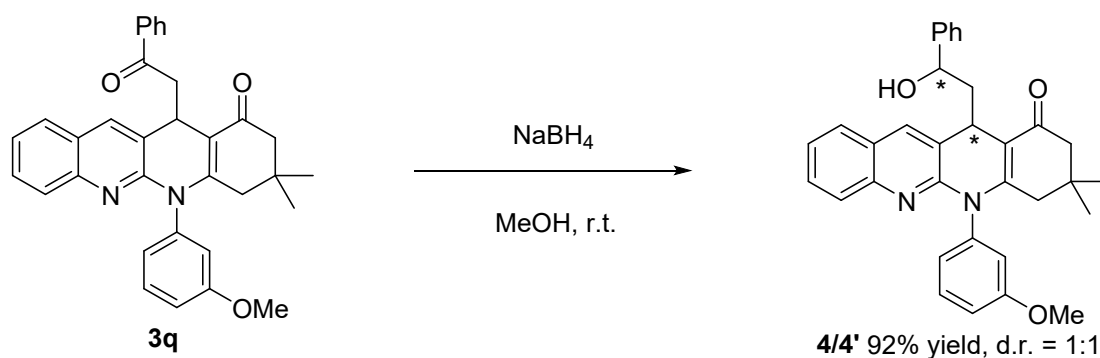

To a 50-mL flame-dried flask was charged with **3q** (150.6 mg, 0.3 mmol) in MeOH (5 mL) was added NaBH<sub>4</sub> (22.6 mg, 0.6 mmol). The reaction mixture was stirred for 1.0 h at room temperature, and the solvent saturated aq. NaHCO<sub>3</sub> (3 mL) was added. The phases were separated and the aqueous layer was extracted with DCM (3 x 2 mL). The combined organic extracts, dried over Na<sub>2</sub>SO<sub>4</sub>, filtered, and concentrated in vacuo. The crude residue was purified by flash column chromatography (PE: EA = 5:1) on silica gel to give the compound **4** (70mg, 46% yield) and **4'** (69mg, 46% yield).

### 12-(2-hydroxy-2-phenylethyl)-5-(3-methoxyphenyl)-3,3-dimethyl-3,4,5,12-tetrahydrobenzo[*b,g*][1,8]naphthyridin-1(2*H*)-one (**4**)

Yellow foam solid, m.p.: 72-73 °C, <sup>1</sup>H NMR (400 MHz, CDCl<sub>3</sub>): δ 7.93 (s, 1H), 7.68 (d, *J* = 8.0 Hz, 1H), 7.60 (d, *J* = 8.4 Hz, 1H), 7.52-7.43 (m, 2H), 7.39-7.27 (m, 5H), 7.20 (t, *J* = 7.2 Hz, 1H), 7.10-7.05 (m, 1H), 6.88 (d, *J* = 8.8 Hz, 2H), 4.66 (dd, *J* = 11.6, 3.6 Hz, 1H), 4.62-4.56 (m, 1H), 3.89 (s, 3H), 2.48-2.34 (m, 2H), 2.24 (q, *J* = 17.6 Hz, 2H), 2.07-1.95 (m, 1H), 1.92-1.79 (m, 2H), 1.15 (s, 3H), 1.05 (s, 3H). <sup>13</sup>C NMR (100 MHz, CDCl<sub>3</sub>): δ 197.6, 160.4, 156.0, 150.3, 145.5, 143.8, 140.0, 135.5, 129.9, 129.0, 128.2, 126.9, 126.8, 126.8, 125.7, 124.8, 124.1, 113.8, 110.6, 69.5, 55.5, 51.6, 49.9, 42.5, 32.1, 31.2, 29.9, 26.6. HRMS (ESI) *m/z* calculated for C<sub>33</sub>H<sub>33</sub>N<sub>2</sub>O<sub>3</sub> [M+H]<sup>+</sup> = 505.2486, found = 505.2486.

**12-(2-hydroxy-2-phenylethyl)-5-(3-methoxyphenyl)-3,3-dimethyl-3,4,5,12-tetrahydrodibenzo[*b,g*][1,8]naphthyridin-1(2*H*)-one (4')**

Yellow foam solid, m.p.: 75-76 °C, <sup>1</sup>H NMR (400 MHz, CDCl<sub>3</sub>): δ 8.11 (s, 1H), 7.75 (d, *J* = 7.2 Hz, 1H), 7.62 (d, *J* = 8.4 Hz, 1H), 7.54-7.48 (m, 1H), 7.45 (t, *J* = 8.0 Hz, 1H), 7.39-7.33 (m, 1H), 7.29-7.26 (m, 3H), 7.22-7.16 (m, 1H), 7.08-7.02 (m, 1H), 6.86 (dd, *J* = 8.0, 4.8 Hz, 2H), 4.76 (dd, *J* = 10.0, 3.2 Hz, 1H), 4.69 (dd, *J* = 8.4, 4.0 Hz, 1H), 3.87 (s, 3H), 2.25 (q, *J* = 16.4 Hz, 2H), 2.18-2.01 (m, 3H), 1.95 (ddd, *J* = 14.0, 8.8, 3.6 Hz, 1H), 0.98 (s, 6H). <sup>13</sup>C NMR (100 MHz, CDCl<sub>3</sub>): δ 195.9, 160.4, 154.4, 150.4, 145.7, 144.9, 140.2, 136.1, 129.8, 129.0, 128.3, 128.2, 127.1, 126.6, 125.7, 124.6, 123.0, 113.9, 111.7, 71.0, 55.5, 50.1, 48.2, 42.1, 32.6, 31.2, 29.1, 27.3. HRMS (ESI) *m/z* calculated for C<sub>33</sub>H<sub>33</sub>N<sub>2</sub>O<sub>3</sub> [M+H]<sup>+</sup> = 505.2486, found = 505.2489.

### 3. Characterization of 3

**5-(4-methoxyphenyl)-3,3-dimethyl-12-(2-oxo-2-phenylethyl)-3,4,5,12-tetrahydrobenzo[*b,g*][1,8]naphthyridin-1(2*H*)-one (3a).** 96% yield, red oily, <sup>1</sup>H NMR (400 MHz, CDCl<sub>3</sub>): δ 8.02-7.96 (m, 2H), 7.83 (s, 1H), 7.64-7.47 (m, 4H), 7.45-7.38 (m, 3H), 7.30-7.26 (m, 2H), 7.06 (d, *J* = 8.8 Hz, 2H), 4.96 (dd, *J* = 7.6, 3.6 Hz, 1H), 3.91 (s, 3H), 3.56-3.29 (m, 2H), 2.34-2.21 (m, 2H), 2.16-2.02 (m, 2H), 0.99 (s, 3H), 0.98 (s, 3H). <sup>13</sup>C{<sup>1</sup>H} NMR (100 MHz, CDCl<sub>3</sub>): δ 198.2, 195.4, 159.0, 155.4, 151.0, 145.7, 137.0, 136.2, 132.8, 132.0, 131.1, 128.9, 128.5, 128.2, 128.1, 126.8, 124.4, 122.3, 114.4, 109.7, 55.4, 50.0, 46.6, 42.4, 32.5, 31.7, 29.1, 27.3. HRMS (ESI) *m/z* calculated for C<sub>33</sub>H<sub>31</sub>N<sub>2</sub>O<sub>3</sub> [M+H]<sup>+</sup> = 503.2329, found = 503.2330.

**3,3-dimethyl-12-(2-oxo-2-phenylethyl)-5-phenyl-3,4,5,12-tetrahydrobenzo[*b,g*][1,8]naphthyridin-1(2*H*)-one (3b).** 75% yield, red oily, <sup>1</sup>H NMR (400 MHz, CDCl<sub>3</sub>): δ 8.03-7.96 (m, 2H), 7.85 (s, 1H), 7.62-7.47 (m, 6H), 7.62-7.48 (m, 5H), 7.29-7.26 (m, 1H), 4.98 (dd, *J* = 7.6, 3.6 Hz, 1H), 3.56-3.33 (m, 2H), 2.35-2.22 (m, 2H), 2.18-2.00 (m, 2H), 0.99 (s, 3H), 0.98 (s, 3H). <sup>13</sup>C{<sup>1</sup>H} NMR (100 MHz, CDCl<sub>3</sub>): δ 198.1, 195.4, 154.83, 150.8, 145.6, 139.4, 137.0, 136.2, 132.8, 130.3, 129.2, 128.9, 128.5, 128.2, 128.1, 128.0, 126.8, 126.3, 124.5, 122.2, 109.7, 50.1, 46.6, 42.3, 32.5, 31.7, 29.1, 27.2. HRMS (ESI) *m/z* calculated for C<sub>32</sub>H<sub>29</sub>N<sub>2</sub>O<sub>2</sub> [M+H]<sup>+</sup> = 473.2224, found = 473.2232.

**3,3-dimethyl-12-(2-oxo-2-phenylethyl)-5-(*p*-tolyl)-3,4,5,12-tetrahydrobenzo[*b,g*][1,8]naphthyridin-1(2*H*)-one (3c).** 96% yield, red oily, <sup>1</sup>H NMR (400 MHz, CDCl<sub>3</sub>): δ 8.00 (d, *J* = 7.2 Hz, 2H), 7.83 (s, 1H), 7.60 (d, *J* = 8.0 Hz,

1H), 7.56-7.48 (m, 2H), 7.47-7.40 (m, 3H), 7.35 (d,  $J = 8.0$  Hz, 2H), 7.26-7.22 (m, 3H), 4.97 (dd,  $J = 7.2, 3.6$  Hz, 1H), 3.50-3.31 (m, 2H), 2.50 (s, 3H), 2.33-2.22 (m, 2H), 2.17-2.03 (m, 2H), 0.99 (s, 3H), 0.98 (s, 3H).  $^{13}\text{C}\{^1\text{H}\}$  NMR (100 MHz,  $\text{CDCl}_3$ ):  $\delta$  198.2, 195.3, 155.1, 150.9, 145.6, 137.9, 137.0, 136.7, 136.2, 132.8, 129.9, 128.9, 128.5, 128.3, 128.0, 126.8, 126.3, 124.4, 122.2, 109.7, 50.1, 46.6, 42.3, 32.5, 31.7, 29.1, 27.3, 21.3. HRMS (ESI)  $m/z$  calculated for  $\text{C}_{33}\text{H}_{31}\text{N}_2\text{O}_2$   $[\text{M}+\text{H}]^+ = 487.2381$ , found = 487.2388.

**5-(4-ethylphenyl)-3,3-dimethyl-12-(2-oxo-2-phenylethyl)-3,4,5,12-tetrahydrobenzo[*b,g*][1,8]naphthyridin-1(2*H*)-one (3d).** 82% yield, red oily,  $^1\text{H}$  NMR (400 MHz,  $\text{CDCl}_3$ ):  $\delta$  8.04-7.97 (m, 2H), 7.83 (s, 1H), 7.62-7.48 (m, 3H), 7.46-7.35 (m, 5H), 7.29-7.25 (m, 3H), 4.98 (dd,  $J = 7.6, 3.6$  Hz, 1H), 3.52-3.31 (m, 2H), 2.80 (q,  $J = 7.6$  Hz, 2H), 2.35-2.21 (m, 2H), 2.18-2.01 (m, 2H), 1.37 (t,  $J = 7.6$  Hz, 3H), 0.99 (s, 6H).  $^{13}\text{C}\{^1\text{H}\}$  NMR (100 MHz,  $\text{CDCl}_3$ ):  $\delta$  198.2, 195.4, 155.2, 150.9, 145.7, 144.1, 137.0, 136.8, 136.3, 132.9, 129.9, 128.9, 128.6, 128.5, 128.3, 128.1, 126.8, 126.3, 124.4, 122.3, 109.8, 50.2, 46.7, 42.3, 32.5, 31.8, 29.1, 28.5, 27.3, 15.2. HRMS (ESI)  $m/z$  calculated for  $\text{C}_{34}\text{H}_{33}\text{N}_2\text{O}_2$   $[\text{M}+\text{H}]^+ = 501.2537$ , found = 501.2546.

**5-(4-isopropylphenyl)-3,3-dimethyl-12-(2-oxo-2-phenylethyl)-3,4,5,12-tetrahydrobenzo[*b,g*][1,8]naphthyridin-1(2*H*)-one (3e).** 95% yield, red oily,  $^1\text{H}$  NMR (400 MHz,  $\text{CDCl}_3$ ):  $\delta$  8.03-7.97 (m, 2H), 7.83 (s, 1H), 7.62-7.48 (m, 3H), 7.46-7.37 (m, 5H), 7.28-7.26 (m, 3H), 4.98 (dd,  $J = 7.6, 3.6$  Hz, 1H), 3.52-3.31 (m, 2H), 3.05 (dt,  $J = 13.6, 6.8$  Hz, 1H), 2.36-2.21 (m, 2H), 2.16-2.00 (m, 2H), 1.37 (d,  $J = 6.8$  Hz, 6H), 0.99 (s, 6H).  $^{13}\text{C}\{^1\text{H}\}$  NMR (100 MHz,  $\text{CDCl}_3$ ):  $\delta$  198.2, 195.4, 155.2, 150.9,

148.7, 145.7, 137.0, 136.9, 136.2, 132.9, 129.9, 128.9, 128.5, 128.3, 128.1, 127.2, 126.8, 126.3, 124.4, 122.3, 109.8, 50.2, 46.6, 42.3, 33.8, 32.5, 31.8, 29.1, 27.4, 24.0, 23.9. HRMS (ESI)  $m/z$  calculated for  $C_{35}H_{35}N_2O_2$   $[M+H]^+$  = 515.2694, found = 515.2698.

**5-(4-(tert-butyl)phenyl)-3,3-dimethyl-12-(2-oxo-2-phenylethyl)-3,4,5,12-tetrahydrodibenzo[*b,g*][1,8]naphthyridin-1(2*H*)-one (3f).** 72% yield, red oily,  $^1H$  NMR (600 MHz,  $CDCl_3$ ):  $\delta$  8.04-7.95 (m, 2H), 7.83 (s, 1H), 7.60 (d,  $J$  = 7.2 Hz, 1H), 7.55 (d,  $J$  = 8.4 Hz, 3H), 7.53-7.49 (m, 1H), 7.45-7.40 (m, 3H), 7.30-7.26 (m, 3H), 4.98 (dd,  $J$  = 7.8, 3.6 Hz, 1H), 3.49-3.30 (m, 2H), 2.34-2.22 (m, 2H), 2.18-2.03 (m, 2H), 1.44 (s, 9H), 1.00 (s, 6H).  $^{13}C\{^1H\}$  NMR (150 MHz,  $CDCl_3$ ):  $\delta$  198.2, 195.4, 155.2, 151.02, 150.96, 145.7, 137.1, 136.6, 136.3, 132.9, 129.6, 128.9, 128.5, 128.3, 128.2, 126.8, 126.3, 126.1, 124.5, 122.3, 109.8, 50.2, 46.7, 42.4, 34.8, 32.6, 31.8, 31.4, 29.1, 27.4. HRMS (ESI)  $m/z$  calculated for  $C_{36}H_{37}N_2O_2$   $[M+H]^+$  = 529.2850, found = 529.2863.

**5-([1,1'-biphenyl]-4-yl)-3,3-dimethyl-12-(2-oxo-2-phenylethyl)-3,4,5,12-tetrahydrodibenzo[*b,g*][1,8]naphthyridin-1(2*H*)-one (3g).** 87% yield, red oily,  $^1H$  NMR (400 MHz,  $CDCl_3$ ):  $\delta$  8.04-7.97 (m, 2H), 7.86 (s, 1H), 7.80 (d,  $J$  = 8.4 Hz, 2H), 7.76-7.71 (m, 2H), 7.66-7.55 (m, 2H), 7.54-7.49 (m, 3H), 7.48-7.38 (m, 6H), 7.31-7.26 (m, 1H), 5.00 (dd,  $J$  = 7.6, 3.6 Hz, 1H), 3.59-3.35 (m, 2H), 2.38-2.24 (m, 2H), 2.23-2.10 (m, 2H), 1.02 (s, 3H), 1.01 (s, 3H).  $^{113}C\{^1H\}$  NMR (100 MHz,  $CDCl_3$ ):  $\delta$  198.2, 195.4, 154.9, 150.9, 145.7, 140.9, 140.2, 138.6, 137.0, 136.3, 132.9, 130.6, 129.0, 128.9, 128.5, 128.3, 128.1, 127.9, 127.7, 127.1, 126.9, 126.4, 124.5, 122.3, 110.0, 50.2, 46.7, 42.5, 32.6, 31.8, 29.1, 27.4. HRMS (ESI)  $m/z$  calculated for  $C_{38}H_{33}N_2O_2$   $[M+H]^+$  = 549.2537, found = 549.2538.

**3,3-dimethyl-5-(4-(methylthio)phenyl)-12-(2-oxo-2-phenylethyl)-3,4,5,12-**

**tetrahydrobenzo[*b,g*][1,8]naphthyridin-1(2*H*)-one (3h).** 96% yield, red oily, <sup>1</sup>H NMR (400 MHz, CDCl<sub>3</sub>): δ 8.01-7.95 (m, 2H), 7.83 (s, 1H), 7.63-7.48 (m, 3H), 7.47-7.38 (m, 5H), 7.33-7.27 (m, 3H), 4.96 (dd, *J* = 7.2, 3.6 Hz, 1H), 3.58-3.28 (m, 2H), 2.59 (s, 3H), 2.35-2.21 (m, 2H), 2.16-2.02 (m, 2H), 0.99 (s, 3H), 0.98 (s, 3H). <sup>13</sup>C{<sup>1</sup>H} NMR (100 MHz, CDCl<sub>3</sub>): δ 198.2, 195.4, 154.9, 150.9, 145.7, 138.7, 137.0, 136.3, 136.2, 132.9, 130.6, 129.0, 128.5, 128.3, 128.1, 126.8, 126.7, 126.3, 124.5, 122.3, 109.9, 50.1, 46.6, 42.4, 32.5, 31.7, 29.1, 27.4, 15.5. HRMS (ESI) *m/z* calculated for C<sub>33</sub>H<sub>31</sub>N<sub>2</sub>O<sub>2</sub>S [M+H]<sup>+</sup> = 519.2101, found = 519.2101.

**3,3-dimethyl-12-(2-oxo-2-phenylethyl)-5-(4-phenoxyphenyl)-3,4,5,12-tetrahydrobenzo[*b,g*][1,8]naphthyridin-1(2*H*)-one (3i).** 94% yield, red oily, <sup>1</sup>H NMR (600 MHz, CDCl<sub>3</sub>): δ 8.01-7.96 (m, 2H), 7.84 (s, 1H), 7.64-7.58 (m, 2H), 7.53-7.49 (m, 1H), 7.48-7.40 (m, 5H), 7.34 (d, *J* = 8.4 Hz, 2H), 7.31-7.27 (m, 1H), 7.22 - 7.15 (m, 5H), 4.97 (dd, *J* = 7.8, 3.6 Hz, 1H), 3.55-3.33 (m, 2H), 2.35-2.24 (m, 2H), 2.20-2.09 (m, 2H), 1.02 (s, 3H), 1.00 (s, 3H). <sup>13</sup>C{<sup>1</sup>H} NMR (150 MHz, CDCl<sub>3</sub>): δ 198.2, 195.4, 157.1, 156.5, 155.0, 151.0, 145.7, 137.0, 136.2, 134.2, 132.9, 131.6, 129.9, 129.0, 128.5, 128.3, 128.1, 126.9, 126.4, 124.5, 123.9, 122.4, 119.6, 118.8, 109.9, 50.2, 46.6, 42.5, 32.6, 31.7, 29.1, 27.4. HRMS (ESI) *m/z* calculated for C<sub>38</sub>H<sub>33</sub>N<sub>2</sub>O<sub>2</sub> [M+H]<sup>+</sup> = 565.2486, found = 565.2495.

**5-(4-fluorophenyl)-3,3-dimethyl-12-(2-oxo-2-phenylethyl)-3,4,5,12-tetrahydrobenzo[*b,g*][1,8]naphthyridin-1(2*H*)-one (3j).** 88% yield, red oily, <sup>1</sup>H NMR (400 MHz, CDCl<sub>3</sub>): δ 8.00-7.93 (m, 2H), 7.84 (s, 1H), 7.61 (d, *J* = 8.0 Hz, 1H), 7.57-7.48 (m, 2H), 7.47-7.36 (m, 5H), 7.30-7.23 (m, 3H), 4.94 (dd, *J* = 6.8, 3.6 Hz, 1H), 3.63-3.31 (m, 2H), 2.35-2.21 (m, 2H), 2.16-2.00 (m, 2H), 1.00 (s, 3H), 0.97 (s,



3H).  $^{13}\text{C}\{^1\text{H}\}$  NMR (100 MHz,  $\text{CDCl}_3$ ):  $\delta$  198.2, 195.4, 162.1 (d,  $J_{\text{C-F}} = 246.0$  Hz), 154.8, 150.9, 145.6, 137.0, 136.2, 135.4 (d,  $J_{\text{C-F}} = 3.0$  Hz), 132.9, 132.0 (d,  $J_{\text{C-F}} = 6.0$  Hz), 129.0, 128.5, 128.2, 128.0, 126.8, 126.3, 124.6, 122.4, 116.2 (d,  $J_{\text{C-F}} = 22.0$  Hz), 109.9, 50.1, 46.6, 42.4, 32.5, 31.7, 29.1, 27.3.  $^{19}\text{F}$  NMR (377 MHz,  $\text{CDCl}_3$ ):  $\delta$  -113.11 – -113.21 (m). HRMS (ESI)  $m/z$  calculated for  $\text{C}_{32}\text{H}_{28}\text{FN}_2\text{O}_2$   $[\text{M}+\text{H}]^+ = 491.2130$ , found = 491.2140.

**5-(4-chlorophenyl)-3,3-dimethyl-12-(2-oxo-2-phenylethyl)-3,4,5,12-tetrahydrobenzo[*b,g*][1,8]naphthyridin-1(2*H*)-one (3k).** 95% yield, red oily,  $^1\text{H}$  NMR (600 MHz,  $\text{CDCl}_3$ ):  $\delta$  7.96 (d,  $J = 7.4$  Hz, 2H), 7.85 (s, 1H), 7.61 (d,  $J = 7.8$  Hz, 1H), 7.54 (d,  $J = 8.4$  Hz, 3H), 7.52-7.48 (m, 1H), 7.47-7.39 (m, 3H), 7.35 (d,  $J = 8.4$  Hz, 2H), 7.31-7.27 (m, 1H), 4.94 (dd,  $J = 7.2, 3.6$  Hz, 1H), 3.60-3.32 (m, 2H), 2.35-2.22 (m, 2H), 2.16-2.02 (m, 2H), 1.00 (s, 3H), 0.98 (s, 3H).  $^{13}\text{C}\{^1\text{H}\}$  NMR (150 MHz,  $\text{CDCl}_3$ ):  $\delta$  198.1, 195.4, 154.4, 150.8, 145.6, 138.1, 137.0, 136.2, 134.0, 132.9, 131.8, 129.5, 129.1, 128.5, 128.2, 128.0, 126.8, 126.4, 124.6, 122.3, 110.0, 50.1, 46.6, 42.4, 32.6, 31.6, 29.1, 27.3. HRMS (ESI)  $m/z$  calculated for  $\text{C}_{32}\text{H}_{28}\text{N}_2\text{O}_2$   $[\text{M}+\text{H}]^+ = 507.1834$ , found = 507.1847.

**5-(4-bromophenyl)-3,3-dimethyl-12-(2-oxo-2-phenylethyl)-3,4,5,12-tetrahydrobenzo[*b,g*][1,8]naphthyridin-1(2*H*)-one (3l).** 94% yield, red oily,  $^1\text{H}$  NMR (400 MHz,  $\text{CDCl}_3$ ):  $\delta$  7.99-7.93 (m, 2H), 7.84 (s, 1H), 7.69 (d,  $J = 8.6$  Hz, 2H), 7.63-7.58 (m, 1H), 7.57-7.38 (m, 5H), 7.32-7.26 (m, 3H), 4.94 (dd,  $J = 7.2, 3.6$  Hz, 1H), 3.61-3.29 (m, 2H), 2.34-2.21 (m, 2H), 2.14-2.01 (m, 2H), 1.00 (s, 3H), 0.97 (s, 3H).  $^{13}\text{C}\{^1\text{H}\}$  NMR (100 MHz,  $\text{CDCl}_3$ ):  $\delta$  198.1, 195.4, 154.3, 150.7, 145.5, 138.6,

136.9, 136.2, 132.9, 132.5, 132.1, 129.1, 128.5, 128.2, 128.0, 126.8, 126.3, 124.6, 122.3, 122.1, 110.0, 50.1, 46.5, 42.4, 32.5, 31.6, 29.1, 27.3. HRMS (ESI)  $m/z$  calculated for  $C_{32}H_{28}BrN_2O_2$   $[M+H]^+ = 551.1329$ , found = 551.1336.

**5-(4-iodophenyl)-3,3-dimethyl-12-(2-oxo-2-phenylethyl)-3,4,5,12-tetrahydrodibenzo[*b,g*][1,8]naphthyridin-1(2*H*)-one (3m).** 91% yield, red oily,  $^1H$  NMR (400 MHz,  $CDCl_3$ ):  $\delta$  7.97-7.93 (m, 2H), 7.89 (d,  $J = 8.8$  Hz, 2H), 7.84 (s, 1H), 7.61 (d,  $J = 8.0$  Hz, 1H), 7.55-7.48 (m, 2H), 7.46-7.38 (m, 3H), 7.31-7.26 (m, 1H), 7.15 (d,  $J = 8.4$  Hz, 2H), 4.94 (dd,  $J = 7.2, 3.6$  Hz, 1H), 3.58-3.32 (m, 2H), 2.33-2.22 (m, 2H), 2.14-2.02 (m, 2H), 1.00 (s, 3H), 0.97 (s, 3H).  $^{13}C\{^1H\}$  NMR (100 MHz,  $CDCl_3$ ):  $\delta$  198.2, 195.4, 154.3, 150.7, 145.6, 139.3, 138.5, 137.0, 136.2, 132.9, 132.4, 129.1, 128.5, 128.2, 128.0, 126.9, 126.4, 124.7, 122.3, 110.1, 93.7, 50.1, 46.6, 42.5, 32.6, 31.6, 29.1, 27.4. HRMS (ESI)  $m/z$  calculated for  $C_{32}H_{28}IN_2O_2$   $[M+H]^+ = 599.1190$ , found = 599.1192.

**3,3-dimethyl-12-(2-oxo-2-phenylethyl)-5-(4-(trifluoromethyl)phenyl)-3,4,5,12-tetrahydrodibenzo[*b,g*][1,8]naphthyridin-1(2*H*)-one (3n).** 76% yield, red oily,  $^1H$  NMR (400 MHz,  $CDCl_3$ ):  $\delta$  7.96 (d,  $J = 7.2$  Hz, 2H), 7.87 (s, 1H), 7.86-7.81 (m, 3H), 7.65-7.49 (m, 5H), 7.48-7.38 (m, 3H), 7.34-7.27 (m, 1H), 4.95 (dd,  $J = 6.4, 3.6$  Hz, 1H), 3.66-3.33 (m, 2H), 2.36-2.23 (m, 2H), 2.13-1.97 (m, 2H), 1.00 (s, 3H), 0.97 (s, 3H).  $^{13}C\{^1H\}$  NMR (100 MHz,  $CDCl_3$ ):  $\delta$  198.2, 195.5, 154.0, 150.7, 145.5, 142.9, 137.0, 136.3, 133.0, 131.1, 130.1, 129.2, 128.5, 128.2, 128.0, 126.9, 126.4 (q,  $J_{C-F} = 7.0$  Hz,  $J_{C-F} = 3.0$  Hz), 124.8, 122.3, 110.2, 50.2, 46.6, 42.5, 32.7, 31.6, 29.1, 27.4.  $^{19}F$  NMR (377 MHz,  $CDCl_3$ ):  $\delta$  -62.32. HRMS (ESI)  $m/z$  calculated for

$C_{33}H_{28}F_3N_2O_2 [M+H]^+ = 541.2097$ , found = 541.2099.

**3,3-dimethyl-5-(4-nitrophenyl)-12-(2-oxo-2-phenylethyl)-3,4,5,12-tetrahydrobenzo[*b,g*][1,8]naphthyridin-1(2*H*)-one (3o).** 88% yield, red oily,  $^1H$  NMR (400 MHz,  $CDCl_3$ ):  $\delta$  8.44 (d,  $J = 8.9$  Hz, 2H), 7.97-7.91 (m, 2H), 7.88 (s, 1H), 7.69-7.61 (m, 3H), 7.54-7.38 (m, 5H), 7.34-7.28 (m, 1H), 4.92 (dd,  $J = 6.0, 4.0$  Hz, 1H), 3.75-3.29 (m, 2H), 2.36-2.23 (m, 2H), 2.14-1.96 (m, 2H), 1.00 (s, 3H), 0.96 (s, 3H).  $^{13}C\{^1H\}$  NMR (100 MHz,  $CDCl_3$ ):  $\delta$  198.2, 195.5, 153.5, 150.6, 147.4, 145.7, 145.4, 136.9, 136.3, 133.0, 131.8, 129.3, 128.6, 128.1, 127.9, 126.9, 126.44, 124.9, 124.6, 122.3, 110.6, 50.1, 46.5, 42.6, 32.7, 31.5, 29.1, 27.4. HRMS (ESI)  $m/z$  calculated for  $C_{32}H_{28}N_3O_4 [M+H]^+ = 518.2075$ , found = 518.2084.

**3,3-dimethyl-12-(2-oxo-2-phenylethyl)-5-(*m*-tolyl)-3,4,5,12-tetrahydrobenzo[*b,g*][1,8]naphthyridin-1(2*H*)-one (3p).** 96% yield, red oily,  $^1H$  NMR (400 MHz,  $CDCl_3$ )  $\delta$  8.04-7.98 (m, 2H), 7.83 (s, 1H), 7.60 (dd,  $J = 8.0, 0.8$  Hz, 1H), 7.57-7.49 (m, 2H), 7.48-7.41 (m, 4H), 7.33-7.27 (m, 2H), 7.17 (d,  $J = 1.2$  Hz, 2H), 4.98 (dd,  $J = 7.6, 4.0$  Hz, 1H), 3.51-3.32 (m, 2H), 2.47 (s, 3H), 2.34-2.22 (m, 2H), 2.17-2.03 (m, 2H), 0.99 (s, 3H), 0.99 (s, 3H).  $^{13}C\{^1H\}$  NMR (100 MHz,  $CDCl_3$ ):  $\delta$  198.2, 195.4, 155.0, 150.9, 145.7, 139.3, 139.2, 137.0, 136.2, 132.9, 128.9, 128.5, 128.3, 128.1, 126.9, 126.3, 124.5, 122.2, 109.7, 50.2, 46.7, 42.4, 32.6, 31.8, 29.1, 27.4, 21.4. HRMS (ESI)  $m/z$  calculated for  $C_{33}H_{31}N_2O_2 [M+H]^+ = 487.2380$ , found = 487.2396.

**5-(3-methoxyphenyl)-3,3-dimethyl-12-(2-oxo-2-phenylethyl)-3,4,5,12-tetrahydrobenzo[*b,g*][1,8]naphthyridin-1(2*H*)-one (3q).** 91% yield, red oily,  $^1H$

**NMR** (400 MHz, CDCl<sub>3</sub>): δ 8.02-7.94 (m, 2H), 7.84 (s, 1H), 7.63-7.54 (m, 2H), 7.52-7.38 (m, 5H), 7.30-7.24 (m, 1H), 7.07-7.02 (m, 1H), 7.00-6.94 (m, 2H), 4.97 (dd, *J* = 7.6, 3.6 Hz, 1H), 3.87 (s, 3H), 3.55-3.32 (m, 2H), 2.36-2.22 (m, 2H), 2.20-2.07 (m, 2H), 0.99 (d, *J* = 3.3 Hz, 6H). **<sup>13</sup>C{<sup>1</sup>H}** **NMR** (100 MHz, CDCl<sub>3</sub>): δ 198.1, 195.3, 160.3, 154.8, 150.7, 145.6, 140.5, 136.9, 136.1, 132.8, 129.7, 128.8, 128.4, 128.2, 128.0, 126.8, 126.3, 124.4, 122.2, 113.8, 109.7, 55.4, 50.1, 46.6, 42.1, 32.5, 31.7, 29.1, 27.2. HRMS (ESI) *m/z* calculated for C<sub>33</sub>H<sub>31</sub>N<sub>2</sub>O<sub>3</sub> [M+H]<sup>+</sup> = 503.2329, found = 503.233d3.

**5-(3-fluorophenyl)-3,3-dimethyl-12-(2-oxo-2-phenylethyl)-3,4,5,12-tetrahydrobenzo[*b,g*][1,8]naphthyridin-1(2*H*)-one (3r)**. 90% yield, red oily, **<sup>1</sup>H NMR** (400 MHz, CDCl<sub>3</sub>): δ 7.96 (d, *J* = 8.0 Hz, 2H), 7.85 (s, 1H), 7.61 (d, *J* = 8.0 Hz, 1H), 7.55-7.48 (m, 3H), 7.47-7.39 (m, 3H), 7.32-7.24 (m, 2H), 7.22-7.17 (m, 2H), 4.97-4.91 (m, 1H), 3.61-3.31 (m, 2H), 2.33-2.22 (m, 2H), 2.17-2.03 (m, 2H), 1.00 (s, 3H), 0.98 (s, 3H). **<sup>13</sup>C{<sup>1</sup>H}** **NMR** (100 MHz, CDCl<sub>3</sub>): δ 198.1, 195.5, 163.1 (d, *J*<sub>C-F</sub> = 246.0 Hz), 154.4, 150.7, 145.6, 141.0 (d, *J*<sub>C-F</sub> = 10.0 Hz), 137.0, 136.2, 132.9, 130.2 (d, *J*<sub>C-F</sub> = 9.0 Hz), 129.1, 128.5, 128.2, 128.1, 126.9, 126.4, 126.3 (d, *J*<sub>C-F</sub> = 2.0 Hz), 124.7, 122.3, 118.1 (d, *J*<sub>C-F</sub> = 22.0 Hz), 115.5 (d, *J*<sub>C-F</sub> = 20.0), 110.0, 50.2, 46.6, 42.3, 32.6, 31.6, 29.1, 27.3. **<sup>19</sup>F NMR** (377 MHz, CDCl<sub>3</sub>): δ -111.3 – -111.69 (m). HRMS (ESI) *m/z* calculated for C<sub>32</sub>H<sub>28</sub>FN<sub>2</sub>O<sub>2</sub> [M+H]<sup>+</sup> = 491.2129, found = 491.2142.

**5-(3-chlorophenyl)-3,3-dimethyl-12-(2-oxo-2-phenylethyl)-3,4,5,12-tetrahydrobenzo[*b,g*][1,8]naphthyridin-1(2*H*)-one (3s)**. 96% yield, red oily, **<sup>1</sup>H NMR** (400 MHz, CDCl<sub>3</sub>): δ 8.00-7.93 (m, 2H), 7.86 (s, 1H), 7.64-7.59 (m, 1H), 7.57-7.52 (m, 1H), 7.52-7.39 (m, 7H), 7.34-7.27 (m, 2H), 4.94 (dd, *J* = 7.2, 3.6 Hz, 1H), 3.62-3.30 (m, 2H), 2.35-2.22 (m, 2H), 2.17-2.00 (m, 2H), 1.01 (s, 3H), 0.98 (s, 3H).

$^{13}\text{C}\{^1\text{H}\}$  NMR (100 MHz,  $\text{CDCl}_3$ ):  $\delta$  198.1, 195.5, 154.3, 150.7, 145.6, 143.0, 140.7, 136.7, 136.3, 134.7, 133.0, 130.7, 130.1, 129.1, 128.5, 128.2, 128.1, 128.0, 126.9, 126.4, 124.7, 122.3, 110.1, 50.2, 46.6, 42.4, 32.6, 31.6, 29.1, 27.4. HRMS (ESI)  $m/z$  calculated for  $\text{C}_{32}\text{H}_{28}\text{ClN}_2\text{O}_2$   $[\text{M}+\text{H}]^+ = 507.1834$ , found = 507.1836.

**5-(3-bromophenyl)-3,3-dimethyl-12-(2-oxo-2-phenylethyl)-3,4,5,12-tetrahydrodibenzo[*b,g*][1,8]naphthyridin-1(2*H*)-one (3t).** 91% yield, red oily,  $^1\text{H}$  NMR (600 MHz,  $\text{CDCl}_3$ ):  $\delta$  8.00-7.93 (m, 2H), 7.86 (s, 1H), 7.66-7.60 (m, 2H), 7.60-7.58 (m, 1H), 7.55 (d,  $J = 8.4$  Hz, 1H), 7.52-7.49 (m, 1H), 7.47-7.39 (m, 4H), 7.37 (d,  $J = 7.8$  Hz, 1H), 7.31-7.27 (m, 1H), 4.95 (dd,  $J = 7.2, 3.6$  Hz, 1H), 3.59-3.33 (m, 2H), 2.33-2.24 (m, 2H), 2.15-2.03 (m, 2H), 1.01 (s, 3H), 0.99 (s, 3H).  $^{13}\text{C}\{^1\text{H}\}$  NMR (150 MHz,  $\text{CDCl}_3$ ):  $\delta$  198.1, 195.4, 154.2, 150.6, 145.5, 140.8, 136.9, 136.3, 133.5, 132.9, 131.4, 130.4, 129.4, 129.1, 128.5, 128.2, 128.1, 126.9, 126.4, 124.7, 122.5, 122.2, 110.1, 50.1, 46.6, 42.4, 32.6, 31.59, 29.1, 27.4. HRMS (ESI)  $m/z$  calculated for  $\text{C}_{32}\text{H}_{28}\text{BrN}_2\text{O}_2$   $[\text{M}+\text{H}]^+ = 551.1329$ , found = 551.1329.

**5-(3-iodophenyl)-3,3-dimethyl-12-(2-oxo-2-phenylethyl)-3,4,5,12-tetrahydrodibenzo[*b,g*][1,8]naphthyridin-1(2*H*)-one (3u).** 95% yield, red oily,  $^1\text{H}$  NMR (600 MHz,  $\text{CDCl}_3$ ):  $\delta$  7.99-7.94 (m, 2H), 7.86 (s, 1H), 7.84 (d,  $J = 7.8$  Hz, 1H), 7.79-7.74 (m, 1H), 7.61 (d,  $J = 7.8$  Hz, 1H), 7.55 (d,  $J = 8.4$  Hz, 1H), 7.53-7.49 (m, 1H), 7.47-7.44 (m, 1H), 7.43-7.37 (m, 3H), 7.32-7.27 (m, 2H), 4.94 (dd,  $J = 7.2, 3.6$  Hz, 1H), 3.59-3.29 (m, 2H), 2.35-2.22 (m, 2H), 2.14-2.01 (m, 2H), 1.00 (s, 3H), 0.99 (s, 3H).  $^{13}\text{C}\{^1\text{H}\}$  NMR (150 MHz,  $\text{CDCl}_3$ ):  $\delta$  198.1, 195.4, 154.3, 150.6, 145.5, 140.6, 139.1, 137.3, 136.9, 136.3, 132.9, 130.6, 130.0, 129.1, 128.5, 128.2, 128.1, 126.9, 126.4, 124.7, 122.2, 110.1, 93.8, 50.1, 46.6, 42.4, 32.6, 31.6, 29.0, 27.4. HRMS (ESI)

m/z calculated for C<sub>32</sub>H<sub>28</sub>N<sub>2</sub>O<sub>2</sub> [M+H]<sup>+</sup> = 599.1190, found = 599.1205.

**5-(benzo[d][1,3]dioxol-5-yl)-3,3-dimethyl-12-(2-oxo-2-phenylethyl)-3,4,5,12-tetrahydrobenzo[b,g][1,8]naphthyridin-1(2H)-one (3v).** 89% yield, red oily, <sup>1</sup>H NMR (400 MHz, CDCl<sub>3</sub>): δ 8.01-7.94 (m, 2H), 7.83 (s, 1H), 7.65-7.57 (m, 2H), 7.53-7.39 (m, 4H), 7.31-7.27 (m, 1H), 6.96 (d, *J* = 8.2 Hz, 1H), 6.91-6.82 (m, 2H), 6.11 (dd, *J* = 7.2, 1.2 Hz, 2H), 4.94 (dd, *J* = 7.3, 3.6 Hz, 1H), 3.55-3.30 (m, 2H), 2.35-2.22 (m, 2H), 2.22-2.10 (m, 2H), 1.01 (s, 3H), 0.99 (s, 3H). <sup>13</sup>C{<sup>1</sup>H} NMR (100 MHz, CDCl<sub>3</sub>): δ 198.1, 195.4, 155.2, 151.0, 147.3, 145.7, 137.0, 136.2, 133.1, 132.9, 129.0, 128.5, 128.2, 128.1, 126.8, 126.3, 124.5, 122.4, 109.8, 108.3f, 101.7, 50.1, 46.6, 42.2, 32.5, 31.7, 29.2, 27.3. HRMS (ESI) m/z calculated for C<sub>33</sub>H<sub>29</sub>N<sub>2</sub>O<sub>4</sub> [M+H]<sup>+</sup> = 517.2122, found = 517.2129.

**5-(2-methoxyphenyl)-3,3-dimethyl-12-(2-oxo-2-phenylethyl)-3,4,5,12-tetrahydrobenzo[b,g][1,8]naphthyridin-1(2H)-one (3w).** 96% yield, red oily, d.r. = 1:1, <sup>1</sup>H NMR (600 MHz, CDCl<sub>3</sub>): δ 8.08-7.99 (m, 2H), 7.84-7.81 (m, 1H), 7.60 (d, *J* = 8.0 Hz, 1H), 7.56-7.47 (m, 3H), 7.46-7.35 (m, 4H), 7.28-7.26 (m, 1H), 7.17-7.13 (m, 1H), 7.10-7.06 (m, 1H), 5.07-4.97 (m, 1H), 3.77 (d, *J* = 82.0 Hz, 3H), 3.55-3.29 (m, 2H), 2.34-2.23 (m, 2H), 2.23-1.99 (m, 2H), 1.06-0.97 (m, 6H). <sup>13</sup>C{<sup>1</sup>H} NMR (150 MHz, CDCl<sub>3</sub>): δ 198.35, 198.32, 195.4, 195.2, 156.8, 155.7, 155.5, 155.2, 150.4, 150.1, 145.9, 145.7, 137.2, 137.1, 136.8, 136.1, 133.1, 132.85, 132.81, 130.6, 129.9, 129.6, 128.9, 128.7, 128.6, 128.54, 128.52, 128.4, 128.3, 128.1, 128.0, 127.3, 127.1, 126.9, 126.4, 126.4, 124.3, 124.2, 122.2, 122.1, 121.4, 120.4, 112.2, 111.8, 110.7, 109.4, 55.9, 55.7, 50.2, 46.6, 46.4, 41.7, 40.9, 32.4, 31.9, 31.8, 29.6, 28.9, 27.8, 27.0.

HRMS (ESI)  $m/z$  calculated for  $C_{33}H_{31}N_2O_3$   $[M+H]^+ = 503.2329$ , found = 503.2342.

**5-(2-fluorophenyl)-3,3-dimethyl-12-(2-oxo-2-phenylethyl)-3,4,5,12-tetrahydrobenzo[*b,g*][1,8]naphthyridin-1(2*H*)-one (3x).** 95% yield, red oily, d.r. = 1:1,  $^1H$  NMR (400 MHz,  $CDCl_3$ ):  $\delta$  8.04-7.97 (m, 2H), 7.96-7.82 (m, 1H), 7.66-7.59 (m, 1H), 7.57-7.40 (m, 7H), 7.39-7.27 (m, 3H), 5.12-4.94(m, 1H), 3.61-3.25 (m, 2H), 2.41-2.03 (m, 4H), 1.10-0.92 (m, 6H).  $^{13}C\{^1H\}$  NMR (100 MHz,  $CDCl_3$ ):  $\delta$  198.3, 198.1, 195.6, 195.3, 159.9 (d,  $J_{C-F} = 249.0$  Hz), 159.9 (d,  $J_{C-F} = 247.0$  Hz), 154.7, 153.9, 150.2, 149.8, 145.8, 145.6, 137.2, 137.1, 136.3, 133.5, 133.0, 132.9, 131.4, 130.5 (d,  $J_{C-F} = 8.0$  Hz), 130.2 (d,  $J_{C-F} = 8.0$  Hz), 129.2, 129.1, 128.6, 128.4, 128.3, 128.2, 128.0, 127.4 (d,  $J_{C-F} = 14.0$  Hz), 127.3, 127.2, 127.0, 126.6, 125.2 (d,  $J_{C-F} = 4.0$  Hz), 124.7, 124.6, 124.2 (d,  $J_{C-F} = 4.0$  Hz), 122.15, 122.07, 116.7 (d,  $J_{C-F} = 20.0$  Hz), 116.3 (d,  $J_{C-F} = 20.0$  Hz), 111.3, 110.1, 50.2, 46.5, 46.3, 41.9, 41.3, 32.6, 32.5, 31.8, 31.2, 29.7, 29.4, 29.0, 27.5, 27.2.  $^{19}F$  NMR (377 MHz,  $CDCl_3$ ):  $\delta$  -118.98 – -119.20 (m), -121.95 – -122.13 (m). HRMS (ESI)  $m/z$  calculated for  $C_{32}H_{28}FN_2O_2$   $[M+H]^+ = 491.2129$ , found = 491.2138.

**5-(2,5-dimethylphenyl)-3,3-dimethyl-12-(2-oxo-2-phenylethyl)-3,4,5,12-tetrahydrobenzo[*b,g*][1,8]naphthyridin-1(2*H*)-one (3y).** 89% yield, red oily, d.r. = 1:1,  $^1H$  NMR (600 MHz,  $CDCl_3$ ):  $\delta$  8.09-7.98 (m, 2H), 7.86-7.80 (m, 1H), 7.62-7.58 (m, 1H), 7.56-7.49 (m, 2H), 7.48-7.45 (m, 1H), 7.44-7.41 (m, 2H), 7.28-7.26 (m, 1H), 7.23 (d,  $J = 7.4$  Hz, 1H), 7.20-7.00 (m, 2H), 5.07-4.97 (m, 1H), 3.53-3.25 (m, 2H), 2.46 (s, 3H), 2.35-2.10 (m, 5H), 2.01 (s, 2H), 1.91-1.84 (m, 1H), 1.04-0.98 (m, 6H).  $^{13}C\{^1H\}$  NMR (150 MHz,  $CDCl_3$ ):  $\delta$  198.2, 198.0, 195.3, 195.2, 155.1, 154.6,

150.03, 149.98, 146.1, 145.9, 138.3 138.2, 137.7, 137.1, 136.9, 136.5, 136.3, 136.2, 136.1, 135.5, 132.94, 132.86, 131.7, 131.5, 130.5, 128.9, 128.8, 128.7, 128.6, 128.5, 128.4, 128.3, 128.2, 128.1, 128.0, 127.4, 127.0, 126.9, 126.4, 126.3, 124.44, 124.39, 122.2, 122.0, 109.9, 109.5, 50.22, 50.15, 47.3, 46.8, 42.3, 41.5, 32.6, 32.3, 31.9, 31.8, 30.0, 28.5, 28.2, 26.6, 21.3, 18.0, 17.9. HRMS (ESI)  $m/z$  calculated for  $C_{34}H_{33}N_2O_2$   $[M+H]^+ = 501.2537$ , found = 501.2550.

**3,3-dimethyl-5-(naphthalen-1-yl)-12-(2-oxo-2-phenylethyl)-3,4,5,12-tetrahydrobenzo[*b,g*][1,8]naphthyridin-1(2*H*)-one (3z).** 92% yield, red oily, d.r. = 1:1,  $^1H$  NMR (600 MHz,  $CDCl_3$ ):  $\delta$  8.32-8.10 (m, 1H), 8.06 -7.97 (m, 3H), 7.92-7.85 (m, 1H), 7.71-7.65 (m, 1H), 7.64-7.28 (m, 9H), 7.26-7.20 (m, 2H), 5.17-5.03 (m, 1H), 3.75-3.40 (m, 2H), 2.34-2.23 (m, 2H), 2.13-1.76 (m, 2H), 0.90 (d,  $J = 1.8$  Hz, 3H), 0.87 (s, 3H).  $^{13}C\{^1H\}$  NMR (150 MHz,  $CDCl_3$ ):  $\delta$  198.3, 198.2, 195.6, 195.5, 155.5, 155.3, 151.0, 150.7, 145.8, 145.7, 137.1, 137.0, 137.0, 136.2, 136.1, 135.7, 134.5, 134.2, 133.0, 132.9, 132.3, 132.0, 129.0, 128.9, 128.8, 128.71, 128.66, 128.6, 128.53, 128.46, 128.43, 128.41, 128.3, 128.2, 128.1, 127.4, 127.2, 126.9, 126.79, 126.77, 126.5, 126.38, 126.35, 126.3, 126.0, 125.4, 124.5, 124.4, 123.4, 122.6, 122.2, 122.1, 109.9, 109.6, 50.3, 50.2, 47.2, 46.9, 42.1, 41.0, 32.5, 32.2, 32.0, 31.9, 29.7, 28.3, 27.8, 26.2. HRMS (ESI)  $m/z$  calculated for  $C_{36}H_{31}N_2O_2$   $[M+H]^+ = 523.2380$ , found = 523.2398.

**5-(4-methoxyphenyl)-4,4-dimethyl-12-(2-oxo-2-phenylethyl)-3,4,5,12-tetrahydrobenzo[*b,g*][1,8]naphthyridin-1(2*H*)-one (3aa).** 90% yield, red oily,  $^1H$  NMR (400 MHz,  $CDCl_3$ ):  $\delta$  8.02-7.95 (m, 2H), 7.83 (s, 1H), 7.63-7.49 (m, 3H), 7.47-



7.40 (m, 3H), 7.29-7.25 (m, 3H), 7.05 (d,  $J = 9.2$  Hz, 2H), 4.96 (dd,  $J = 7.6, 4.0$  Hz, 1H), 3.91 (s, 3H), 3.49-3.15 (m, 2H), 2.31-2.07 (m, 2H), 1.69-1.65 (m, 2H), 1.13 (s, 3H), 1.10 (s, 3H).  $^{13}\text{C}\{^1\text{H}\}$  NMR (150 MHz,  $\text{CDCl}_3$ ):  $\delta$  200.6, 198.4, 159.1, 155.0, 150.9, 145.8, 137.2, 136.3, 132.9, 132.0, 131.2, 128.9, 128.5, 128.4, 128.1, 126.9, 126.4, 124.4, 122.3, 114.4, 109.1, 55.5, 46.9, 39.3, 35.0, 32.4, 25.8, 25.1, 24.2. HRMS (ESI)  $m/z$  calculated for  $\text{C}_{33}\text{H}_{31}\text{N}_2\text{O}_3$   $[\text{M}+\text{H}]^+ = 503.2329$ , found = 503.2332.

**5-(4-methoxyphenyl)-12-(2-oxo-2-phenylethyl)-3,4,5,12-tetrahydrobenzo[*b,g*][1,8]naphthyridin-1(2*H*)-one (3ab).** 81% yield, red oily,  $^1\text{H}$  NMR (400 MHz,  $\text{CDCl}_3$ ):  $\delta$  8.01-7.96 (m, 2H), 7.87 (s, 1H), 7.64-7.60 (m, 1H), 7.55 (d,  $J = 8.4$  Hz, 1H), 7.53-7.48 (m, 1H), 7.46-7.38 (m, 3H), 7.30-7.25 (m, 3H), 7.07-7.02 (d,  $J = 9.0$  Hz, 2H), 4.99 (dd,  $J = 7.6, 3.6$  Hz, 1H), 3.90 (s, 3H), 3.55-3.23 (m, 2H), 2.48-2.29 (m, 2H), 2.25-2.17 (m, 2H), 1.94-1.86 (m, 1H), 1.83-1.71 (m, 1H).  $^{13}\text{C}\{^1\text{H}\}$  NMR (100 MHz,  $\text{CDCl}_3$ ):  $\delta$  198.3, 195.6, 159.1, 157.0, 150.9, 145.7, 137.1, 136.3, 132.9, 132.1, 128.9, 128.5, 128.3, 128.1, 126.9, 126.4, 124.4, 122.4, 114.4, 110.8, 55.4, 46.8, 36.5, 31.8, 29.0, 21.4. HRMS (ESI)  $m/z$  calculated for  $\text{C}_{31}\text{H}_{27}\text{N}_2\text{O}_3$   $[\text{M}+\text{H}]^+ = 475.2016$ , found = 475.2032.

**5-(4-methoxyphenyl)-12-(2-oxo-2-phenylethyl)-3-phenyl-3,4,5,12-tetrahydrobenzo[*b,g*][1,8]naphthyridin-1(2*H*)-one (3ac).** 87% yield, red oily, d.r. = 1:1,  $^1\text{H}$  NMR (600 MHz,  $\text{CDCl}_3$ ):  $\delta$  8.04-7.97 (m, 2H), 7.93-7.87 (m, 1H), 7.66-7.61 (m, 1H), 7.60-7.51 (m, 2H), 7.48-7.41 (m, 3H), 7.35-7.25 (m, 5H), 7.24-7.18 (m, 1H), 7.16-7.11 (m, 2H), 7.05-6.98 (m, 2H), 5.05 (dd,  $J = 7.4, 3.8$  Hz, 1H), 5.07-4.97 (m, 1H), 3.90-3.84 (m, 3H), 3.67-3.49 (m, 1H), 3.42-3.00 (m, 2H), 2.76-2.57 (m, 2H),

2.53-2.40 (m, 2H).  $^{13}\text{C}\{^1\text{H}\}$  NMR (150 MHz,  $\text{CDCl}_3$ ):  $\delta$  198.3, 198.2, 194.8, 194.5, 159.1, 156.2, 156.1, 151.1, 150.7, 145.7, 145.7, 142.9, 142.8, 137.2, 137.0, 136.3, 136.2, 133.0, 132.9, 131.95, 131.6, 129.0, 128.7, 128.6, 128.6, 128.5, 128.31, 128.28, 128.2, 128.1, 126.92, 126.86, 126.76, 126.7, 126.42, 126.39, 124.6, 124.5, 122.4, 122.2, 114.6, 114.3, 111.2, 110.1, 55.4, 46.9, 46.3, 43.6, 43.4, 40.1, 39.2, 36.5, 35.9, 32.0, 31.8. HRMS (ESI)  $m/z$  calculated for  $\text{C}_{37}\text{H}_{31}\text{N}_2\text{O}_3$   $[\text{M}+\text{H}]^+ = 551.2329$ , found = 551.2347.

**5-(4-methoxyphenyl)-3,3,9-trimethyl-12-(2-oxo-2-phenylethyl)-3,4,5,12-tetrahydrodibenzo[*b,g*][1,8]naphthyridin-1(2*H*)-one (3ad).** 93% yield, red oily,  $^1\text{H}$  NMR (400 MHz,  $\text{CDCl}_3$ ):  $\delta$  8.05-7.98 (m, 2H), 7.73 (s, 1H), 7.55-7.49 (m, 1H), 7.48-7.40 (m, 3H), 7.37 (s, 1H), 7.27 (d,  $J = 7.5$  Hz, 3H), 7.06 (d,  $J = 8.9$  Hz, 2H), 4.95 (dd,  $J = 7.4, 4.1$  Hz, 1H), 3.92 (s, 3H), 3.39 (qd,  $J = 15.3, 5.9$  Hz, 2H), 2.41 (s, 3H), 2.33-2.22 (m, 2H), 2.16-2.05 (m, 2H), 0.99 (s, 3H), 0.98 (s, 3H).  $^{13}\text{C}\{^1\text{H}\}$  NMR (100 MHz,  $\text{CDCl}_3$ ):  $\delta$  198.2, 195.3, 159.0, 155.4, 150.5, 144.2, 137.0, 135.6, 134.1, 132.9, 132.1, 131.1, 128.5, 128.3, 127.8, 126.3, 125.9, 122.1, 114.4, 109.6, 55.4, 50.1, 46.7, 42.4, 32.5, 31.9, 29.2, 27.4, 21.3. HRMS (ESI)  $m/z$  calculated for  $\text{C}_{34}\text{H}_{33}\text{N}_2\text{O}_3$   $[\text{M}+\text{H}]^+ = 517.2491$ , found = 517.2492.

**9-methoxy-5-(4-methoxyphenyl)-3,3-dimethyl-12-(2-oxo-2-phenylethyl)-3,4,5,12-tetrahydrodibenzo[*b,g*][1,8]naphthyridin-1(2*H*)-one (3ae).** 80% yield, red oily,  $^1\text{H}$  NMR (600 MHz,  $\text{CDCl}_3$ ):  $\delta$  8.00 (d,  $J = 7.8$  Hz, 2H), 7.75 (s, 1H), 7.50 (t,  $J = 7.2$  Hz, 1H), 7.47-7.40 (m, 3H), 7.25 (s, 1H), 7.10 (d,  $J = 9.0$  Hz, 1H), 7.05 (d,  $J = 7.8$  Hz, 2H), 6.91 (s, 1H), 4.96 (d,  $J = 6.0$  Hz, 1H), 3.91 (s, 3H), 3.83 (s, 3H), 3.48-

3.30 (m, 2H), 2.32-2.22 (m, 2H), 2.14-2.04 (m, 2H), 0.98 (s, 6H).  $^{13}\text{C}\{^1\text{H}\}$  NMR (150 MHz,  $\text{CDCl}_3$ ):  $\delta$  198.2, 195.3, 159.0, 156.4, 155.4, 149.5, 141.4, 137.0, 135.2, 132.9, 132.1, 131.2, 129.5, 128.5, 128.3, 127.0, 122.4, 121.3, 114.4, 109.3, 104.9, 55.4, 55.4, 50.1, 46.6, 42.4, 32.5, 31.7, 29.1, 27.3. HRMS (ESI)  $m/z$  calculated for  $\text{C}_{34}\text{H}_{33}\text{N}_2\text{O}_5$   $[\text{M}+\text{H}]^+ = 533.2440$ , found = 533.2448.

**5-(4-methoxyphenyl)-3,3-dimethyl-9-(methylthio)-12-(2-oxo-2-phenylethyl)-3,4,5,12-tetrahydrodibenzo[*b,g*][1,8]naphthyridin-1(2*H*)-one (3af).** 82% yield, red oily,  $^1\text{H}$  NMR (400 MHz,  $\text{CDCl}_3$ ):  $\delta$  8.03-7.96 (m, 2H), 7.74 (s, 1H), 7.51 (t,  $J = 7.3$  Hz, 1H), 7.47-7.40 (m, 3H), 7.38-7.31 (m, 2H), 7.28-7.25 (m, 2H), 7.05 (d,  $J = 8.8$  Hz, 2H), 4.95 (dd,  $J = 7.6, 3.6$  Hz, 1H), 3.91 (s, 3H), 3.51-3.30 (m, 2H), 2.50 (s, 3H), 2.34-2.21 (m, 2H), 2.17-2.01 (m, 2H), 0.99 (s, 3H), 0.98 (s, 3H).  $^{13}\text{C}\{^1\text{H}\}$  NMR (100 MHz,  $\text{CDCl}_3$ ):  $\delta$  198.2, 195.3, 159.1, 155.2, 150.6, 143.9, 137.0, 135.1, 134.6, 132.9, 132.0, 128.8, 128.5, 128.4, 128.3, 126.8, 122.9, 122.5, 114.4, 109.6, 55.4, 50.1, 46.6, 42.4, 32.5, 31.7, 29.1, 27.3, 16.0. HRMS (ESI)  $m/z$  calculated for  $\text{C}_{34}\text{H}_{33}\text{N}_2\text{O}_3\text{S}$   $[\text{M}+\text{H}]^+ = 549.2212$ , found = 549.2219.

**9-fluoro-5-(4-methoxyphenyl)-3,3-dimethyl-12-(2-oxo-2-phenylethyl)-3,4,5,12-tetrahydrodibenzo[*b,g*][1,8]naphthyridin-1(2*H*)-one (3ag).** 88% yield, red oil,  $^1\text{H}$  NMR (400 MHz,  $\text{CDCl}_3$ ):  $\delta$  7.99 (d,  $J = 7.6$  Hz, 2H), 7.76 (s, 1H), 7.58-7.49 (m, 2H), 7.48-7.39 (m, 2H), 7.28-7.17 (m, 4H), 7.06 (d,  $J = 8.8$  Hz, 2H), 4.94 (dd,  $J = 7.6, 3.6$  Hz, 1H), 3.92 (s, 3H), 3.53-3.31 (m, 2H), 2.34-2.21 (m, 2H), 2.18-2.03 (m, 2H), 0.99 (s, 3H), 0.97 (s, 3H).  $^{13}\text{C}\{^1\text{H}\}$  NMR (100 MHz,  $\text{CDCl}_3$ ):  $\delta$  198.2, 195.3, 159.3 (d,  $J_{\text{C-F}} = 243.0$  Hz), 159.1, 158.10, 155.3, 150.7 (d,  $J_{\text{C-F}} = 3.0$  Hz), 142.7, 136.9,

135.5 (d,  $J_{C-F} = 5.0$  Hz), 133.0, 133.0, 131.2, 130.3 (d,  $J_{C-F} = 9.0$  Hz), 128.6, 128.3, 126.6 (d,  $J_{C-F} = 10.0$  Hz), 123.4, 118.8 (d,  $J_{C-F} = 26.0$  Hz), 114.5, 110.1 (d,  $J_{C-F} = 21.0$  Hz), 109.6, 55.5, 50.1, 46.5, 42.4, 32.5, 31.8, 29.1, 27.4.  $^{19}\text{F}$  NMR (377 MHz,  $\text{CDCl}_3$ ):  $\delta$  -116.58 (dd,  $J = 13.9, 8.5$  Hz). HRMS (ESI)  $m/z$  calculated for  $\text{C}_{33}\text{H}_{30}\text{FN}_2\text{O}_3$   $[\text{M}+\text{H}]^+ = 521.2240$ , found = 521.2256.

**9-chloro-5-(4-methoxyphenyl)-3,3-dimethyl-12-(2-oxo-2-phenylethyl)-3,4,5,12-tetrahydrodibenzo[*b,g*][1,8]naphthyridin-1(2*H*)-one (3ah).** 86% yield, red oily,  $^1\text{H}$  NMR (400 MHz,  $\text{CDCl}_3$ ):  $\delta$  8.04-7.94 (m, 2H), 7.72 (s, 1H), 7.57 (d,  $J = 2.4$  Hz, 1H), 7.55-7.40 (m, 4H), 7.39-7.34 (m, 1H), 7.30-7.24 (m, 2H), 7.06 (d,  $J = 8.8$  Hz, 2H), 4.93 (dd,  $J = 7.6, 3.6$  Hz, 1H), 3.92 (s, 3H), 3.53-3.30 (m, 2H), 2.34-2.20 (m, 2H), 2.17-2.03 (m, 2H), 0.99 (s, 3H), 0.97 (s, 3H).  $^{13}\text{C}\{^1\text{H}\}$  NMR (100 MHz,  $\text{CDCl}_3$ ):  $\delta$  198.1, 195.4, 159.2, 155.2, 151.4, 144.1, 136.9, 135.2, 133.0, 131.9, 129.9, 129.8, 129.69, 129.65, 128.6, 128.3, 126.8, 125.5, 123.5, 114.5, 109.8, 55.5, 50.1, 46.5, 42.4, 32.5, 31.8, 29.2, 27.3. HRMS (ESI)  $m/z$  calculated for  $\text{C}_{33}\text{H}_{30}\text{BrN}_2\text{O}_3$   $[\text{M}+\text{H}]^+ = 581.1440$ , found = 581.1446.

**9-bromo-5-(4-methoxyphenyl)-3,3-dimethyl-12-(2-oxo-2-phenylethyl)-3,4,5,12-tetrahydrodibenzo[*b,g*][1,8]naphthyridin-1(2*H*)-one (3ai).** 85% yield, red oily,  $^1\text{H}$  NMR (400 MHz,  $\text{CDCl}_3$ ):  $\delta$  8.03-7.94 (m, 2H), 7.74 (d,  $J = 2.0$  Hz, 1H), 7.72 (s, 1H), 7.55-7.47 (m, 2H), 7.46-7.38 (m, 3H), 7.29-7.24 (m, 2H), 7.06 (d,  $J = 9.2$  Hz, 2H), 4.93 (dd,  $J = 7.6, 3.6$  Hz, 1H), 3.92 (s, 3H), 3.53-3.30 (m, 2H), 2.34-2.21 (m, 2H), 2.17-2.00 (m, 2H), 0.99 (s, 3H), 0.97 (s, 3H).  $^{13}\text{C}\{^1\text{H}\}$  NMR (100 MHz,  $\text{CDCl}_3$ ):  $\delta$  198.1, 195.4, 159.1, 155.2, 151.4, 144.3, 136.9, 135.1, 133.0, 132.2, 131.9, 129.8,

128.8, 128.6, 128.3, 127.4, 123.5, 117.9, 114.5, 109.8, 55.5, 50.1, 46.5, 42.3, 32.5, 31.8, 29.2, 27.3. HRMS (ESI)  $m/z$  calculated for  $C_{33}H_{30}ClN_2O_3$   $[M+H]^+ = 537.1945$ , found = 537.1947.

**8-fluoro-5-(4-methoxyphenyl)-3,3-dimethyl-12-(2-oxo-2-phenylethyl)-3,4,5,12-tetrahydrodibenzo[*b,g*][1,8]naphthyridin-1(2*H*)-one (3aj).** 87% yield, red oily,  $^1H$  NMR (400 MHz,  $CDCl_3$ ):  $\delta$  7.98 (d,  $J = 7.6$  Hz, 2H), 7.81 (s, 1H), 7.61-7.54 (m, 1H), 7.53-7.47 (m, 1H), 7.46-7.37 (m, 2H), 7.28-7.22 (m, 2H), 7.21-7.15 (m, 1H), 7.10-6.99 (m, 3H), 4.93 (dd,  $J = 7.2, 3.2$  Hz, 1H), 3.92 (s, 3H), 3.40 (ddd,  $J = 19.0, 15.6, 5.6$  Hz, 2H), 2.33 – 2.22 (m, 2H), 2.17 – 2.04 (m, 2H), 0.99 (s, 3H), 0.98 (s, 3H).  $^{13}C\{^1H\}$  NMR (100 MHz,  $CDCl_3$ ):  $\delta$  198.2, 195.4, 163.0 (d,  $J_{C-F} = 243.0$  Hz), 159.1, 155.1, 151.9, 146.7 (d,  $J_{C-F} = 12.0$  Hz), 136.9, 136.1, 132.9, 131.9, 131.0, 128.7 (d,  $J_{C-F} = 10.0$  Hz), 128.5, 128.2, 123.2, 121.5 (d,  $J_{C-F} = 2.0$  Hz), 114.49 (d,  $J_{C-F} = 25.0$  Hz), 114.46, 111.9 (d,  $J_{C-F} = 21.0$  Hz), 110.0, 55.4, 50.1, 46.5, 42.3, 32.5, 31.6, 29.1, 27.3.  $^{19}F$  NMR (377 MHz,  $CDCl_3$ ):  $\delta$  -110.81 – -111.02 (m). HRMS (ESI)  $m/z$  calculated for  $C_{33}H_{30}FN_2O_3$   $[M+H]^+ = 521.2240$ , found = 521.2252.

**8-chloro-5-(4-methoxyphenyl)-3,3-dimethyl-12-(2-oxo-2-phenylethyl)-3,4,5,12-tetrahydrodibenzo[*b,g*][1,8]naphthyridin-1(2*H*)-one (3ak).** 88% yield, red oily,  $^1H$  NMR (600 MHz,  $CDCl_3$ ):  $\delta$  8.01-7.95 (m, 2H), 7.79 (s, 1H), 7.55 (d,  $J = 1.8$  Hz, 1H), 7.54-7.49 (m, 2H), 7.45-7.40 (m, 2H), 7.26-7.19 (m, 3H), 7.10-7.04 (m, 2H), 4.93 (dd,  $J = 7.8, 3.6$  Hz, 1H), 3.92 (s, 3H), 3.52-3.32 (m, 2H), 2.32-2.22 (m, 2H), 2.17-2.03 (m, 2H), 0.99 (s, 3H), 0.97 (s, 3H).  $^{13}C\{^1H\}$  NMR (150 MHz,  $CDCl_3$ ):  $\delta$  198.1, 195.4, 159.2, 155.1, 151.88, 146.2, 136.9, 136.0, 134.7, 133.0, 131.9, 131.0,

128.5, 128.3, 128.0, 127.1, 125.3, 124.6, 122.7, 114.5, 109.9, 55.5, 50.1, 46.5, 42.4, 32.5, 31.7, 29.2, 27.3. HRMS (ESI)  $m/z$  calculated for  $C_{33}H_{30}ClN_2O_3$   $[M+H]^+$  = 537.1945, found = 537.1965.

**5-(4-methoxyphenyl)-3,3,7,8-tetramethyl-12-(2-oxo-2-phenylethyl)-3,4,5,12-tetrahydrobenzo[*b,g*][1,8]naphthyridin-1(2*H*)-one (3al).** 80% yield, red oily,  $^1H$  NMR (400 MHz,  $CDCl_3$ ):  $\delta$  8.03-7.97 (m, 2H), 7.74 (s, 1H), 7.54-7.48 (m, 1H), 7.46-7.40 (m, 2H), 7.35 (d,  $J$  = 8.4 Hz, 1H), 7.29 (d,  $J$  = 8.8 Hz, 2H), 7.13-7.03 (m, 3H), 3.54-3.30 (dd,  $J$  = 7.6, 3.6 Hz, 1H), 3.92 (s, 3H), 3.54-3.30 (m, 2H), 2.33 (s, 3H), 2.31-2.23 (m, 2H), 2.18 (s, 3H), 2.16 (s, 2H), 1.000 (s, 3H), 0.997 (s, 3H).  $^{13}C\{^1H\}$  NMR (100 MHz,  $CDCl_3$ ):  $\delta$  198.3, 195.4, 159.0, 155.4, 149.9, 144.4, 137.1, 136.8, 136.3, 134.9, 133.1, 132.8, 132.4, 129.6, 128.5, 128.3, 127.4, 124.5, 123.7, 120.7, 115.4, 114.2, 109.5, 55.48, 50.2, 46.8, 42.4, 32.5, 31.6, 29.1, 27.4, 20.4, 12.5. HRMS (ESI)  $m/z$  calculated for  $C_{35}H_{35}N_2O_5$   $[M+H]^+$  = 531.2648, found = 531.2656.

**5-(4-methoxyphenyl)-3,3,7,9-tetramethyl-12-(2-oxo-2-phenylethyl)-3,4,5,12-tetrahydrobenzo[*b,g*][1,8]naphthyridin-1(2*H*)-one (3am).** 88% yield, red oily,  $^1H$  NMR (400 MHz,  $CDCl_3$ ):  $\delta$  8.08-8.00 (m, 2H), 7.69 (s, 1H), 7.55-7.48 (m, 1H), 7.47-7.41 (m, 2H), 7.29 (d,  $J$  = 9.2 Hz, 2H), 7.21 (s, 1H), 7.15 (s, 1H), 7.05 (d,  $J$  = 9.0 Hz, 2H), 4.96 (dd,  $J$  = 7.2, 4.8 Hz, 1H), 3.91 (s, 3H), 3.46-.34 (m, 2H), 2.37 (s, 3H), 2.34-2.23 (m, 2H), 2.21 (s, 3H), 2.16 (s, 2H), 1.00 (s, 6H).  $^{13}C\{^1H\}$  NMR (100 MHz,  $CDCl_3$ ):  $\delta$  198.3, 195.3, 158.9, 155.3, 149.4, 143.0, 137.0, 135.7, 135.5, 133.9, 132.8, 132.3, 131.3, 128.5, 128.3, 126.2, 123.6, 121.7, 114.1, 109.4, 55.4, 50.2, 46.8, 42.4, 32.5, 31.8, 29.1, 27.4, 21.3, 16.9. HRMS (ESI)  $m/z$  calculated for  $C_{35}H_{35}N_2O_5$

$[M+H]^+ = 531.2648$ , found = 531.2656.

**5-(4-methoxyphenyl)-3,3,7,10-tetramethyl-12-(2-oxo-2-phenylethyl)-3,4,5,12-tetrahydrodibenzo[*b,g*][1,8]naphthyridin-1(2*H*)-one (3an)**

90% yield, red oily,  $^1\text{H NMR}$  (600 MHz,  $\text{CDCl}_3$ ):  $\delta$  8.09-8.05 (m, 2H), 7.86 (s, 1H), 7.55-7.51 (m, 1H), 7.48-7.44 (m, 2H), 7.28 (d,  $J = 8.4$  Hz, 2H), 7.19 (d,  $J = 7.2$  Hz, 1H), 7.05 (d,  $J = 9.0$  Hz, 2H), 6.99 (d,  $J = 7.1$  Hz, 1H), 5.00 (dd,  $J = 8.4, 3.6$  Hz, 1H), 3.92 (s, 3H), 3.49-3.31 (m, 2H), 2.47 (s, 3H), 2.34-2.26 (m, 2H), 2.19 (s, 3H), 2.18-2.15 (m, 2H), 1.01 (s, 3H), 1.01 (s, 3H).  $^{13}\text{C}\{^1\text{H}\}$  NMR (150 MHz,  $\text{CDCl}_3$ ):  $\delta$  198.5, 195.3, 159.0, 155.3, 149.4, 144.8, 137.0, 133.8, 133.1, 132.9, 132.2, 131.3, 128.7, 128.6, 128.4, 125.4, 124.8, 120.8, 114.2, 109.5, 55.5, 50.2, 47.1, 42.4, 32.6, 32.3, 29.1, 27.4, 18.4, 17.0. HRMS (ESI)  $m/z$  calculated for  $\text{C}_{35}\text{H}_{35}\text{N}_2\text{O}_5$   $[M+H]^+ = 531.2648$ , found = 531.2658.

**6-(4-methoxyphenyl)-8,8-dimethyl-11-(2-oxo-2-phenylethyl)-7,8,9,11-tetrahydro-[1,3]dioxolo[4',5':4,5]benzo[1,2-*b*]benzo[*g*][1,8]naphthyridin-10(6*H*)-one (3ao)**

84% yield, red oily,  $^1\text{H NMR}$  (400 MHz,  $\text{CDCl}_3$ ):  $\delta$  8.01 (d,  $J = 7.2$  Hz, 2H), 7.61 (s, 1H), 7.54-7.48 (m, 1H), 7.46-7.37 (m, 2H), 7.23 (d,  $J = 8.4$  Hz, 2H), 7.04 (d,  $J = 8.4$  Hz, 2H), 6.86 (s, 2H), 5.95 (d,  $J = 3.2$  Hz, 2H), 4.90 (t,  $J = 5.2$  Hz, 1H), 3.90 (s, 3H), 3.45-3.23 (m, 2H), 2.35-2.19 (m, 2H), 2.15-1.96 (m, 2H), 0.98 (s, 7H).  $^{13}\text{C}\{^1\text{H}\}$  NMR (100 MHz,  $\text{CDCl}_3$ ):  $\delta$  198.4, 195.3, 159.0, 155.3, 150.2, 149.7, 146.3, 143.5, 137.0, 135.3, 132.8, 132.1, 128.5, 128.3, 122.6, 119.6, 114.3, 109.4, 105.1, 102.3, 101.3, 55.4, 50.1, 46.7, 42.3, 32.5, 31.7, 29.1, 27.3. HRMS (ESI)  $m/z$

calculated for  $C_{34}H_{31}N_2O_5$   $[M+H]^+ = 547.2233$ , found = 547.2239.

**13-(4-methoxyphenyl)-11,11-dimethyl-8-(2-oxo-2-phenylethyl)-8,11,12,13-tetrahydrobenzo[*b*]naphtho[2,1-*g*][1,8]naphthyridin-9(10*H*)-one (3ap).** 85% yield, red oily,  $^1H$  NMR (600 MHz,  $CDCl_3$ ):  $\delta$  8.41 (d,  $J = 7.8$  Hz, 1H), 8.01 (d,  $J = 7.8$  Hz, 2H), 7.86 (s, 1H), 7.76 (d,  $J = 7.8$  Hz, 1H), 7.58 (d,  $J = 8.8$  Hz, 1H), 7.54-7.48 (m, 3H), 7.48-7.41 (m, 3H), 7.36 (d,  $J = 9.0$  Hz, 2H), 7.14 (d,  $J = 9.0$  Hz, 2H), 5.02 (dd,  $J = 7.8, 3.6$  Hz, 1H), 3.98 (s, 3H), 3.53-3.33 (m, 2H), 2.36-2.25 (m, 2H), 2.17 (s, 2H), 1.02 (s, 6H).  $^{13}C\{^1H\}$  NMR (150 MHz,  $CDCl_3$ ):  $\delta$  198.3, 195.4, 159.1, 155.3, 150.2, 143.4, 137.1, 136.4, 133.6, 132.8, 132.2, 130.9, 128.5, 128.3, 127.5, 127.4, 126.4, 125.5, 124.7, 124.1, 123.7, 121.6, 114.4, 109.4, 55.55, 50.2, 46.8, 42.3, 32.5, 31.7, 29.2, 27.4. HRMS (ESI)  $m/z$  calculated for  $C_{37}H_{33}N_2O_5$   $[M+H]^+ = 553.2491$ , found = 553.2498.

**5-(4-methoxyphenyl)-3,3-dimethyl-12-(2-oxopropyl)-3,4,5,12-tetrahydrodibenzo[*b,g*][1,8]naphthyridin-1(2*H*)-one (3aq).** 51% yield, red oily,  $^1H$  NMR (600 MHz,  $CDCl_3$ ):  $\delta$  7.97 (s, 1H), 7.67 (d,  $J = 7.8$  Hz, 1H), 7.59 (d,  $J = 8.4$  Hz, 1H), 7.48-7.45 (m, 1H), 7.33-.29 (m, 1H), 7.27-7.26 (m, 2H), 7.09-7.03 (m, 2H), 4.78 (dd,  $J = 6.6, 4.2$  Hz, 1H), 3.92 (s, 3H), 3.04-2.69 (m, 2H), 2.26 (s, 2H), 2.14-2.06 (m, 3H), 2.03 (s, 3H), 1.00 (s, 3H), 0.99 (s, 3H).  $^{13}C\{^1H\}$  NMR (150 MHz,  $CDCl_3$ ):  $\delta$  206.7, 195.3, 159.1, 155.2, 151.1, 145.6, 136.3, 132.0, 129.1, 128.1, 126.9, 126.4, 124.6, 122.8, 114.5, 109.7, 55.5, 51.6, 50.1, 42.4, 32.5, 30.7, 30.5, 29.4, 27.2. HRMS (ESI)  $m/z$  calculated for  $C_{28}H_{29}N_2O_3$   $[M+H]^+ = 441.2173$ , found = 441.2192.

**Ethyl 2-(6-(4-methoxyphenyl)-8,8-dimethyl-10-oxo-6,7,8,9,10,11-hexahydro-**



**dibenzo[*b,g*][1,8]naphthyridin-11-yl)acetate (3ar).** 43% yield, red oily,  $^1\text{H}$  NMR (600 MHz,  $\text{CDCl}_3$ ):  $\delta$  8.00 (s, 1H), 7.69-7.66 (m, 1H), 7.63 (d,  $J = 8.4$  Hz, 1H), 7.51-7.46 (m, 1H), 7.34-7.30 (m, 1H), 7.25-7.21 (m, 2H), 7.08-7.03 (m, 2H), 4.80 (dd,  $J = 7.2, 5.6$  Hz, 1H), 3.98 (q,  $J = 7.2$  Hz, 2H), 3.93 (s, 3H), 2.78-2.62 (m, 2H), 2.28 (s, 2H), 2.16-2.06 (m, 2H), 1.06 (t,  $J = 7.2$  Hz, 3H), 1.03 (s, 3H), 0.99 (s, 3H).  $^{13}\text{C}\{^1\text{H}\}$  NMR (150 MHz,  $\text{CDCl}_3$ ):  $\delta$  195.1, 171.2, 159.2, 155.0, 151.0, 145.6, 136.5, 131.9, 131.0, 129.2, 128.1, 126.9, 126.4, 124.6, 122.1, 114.5, 109.7, 60.2, 55.5, 50.1, 42.5, 42.4, 32.4, 31.5, 29.5, 27.0, 14.1. HRMS (ESI)  $m/z$  calculated for  $\text{C}_{29}\text{H}_{31}\text{N}_2\text{O}_4$   $[\text{M}+\text{H}]^+ = 471.2278$ , found = 471.2296.

#### 4. X-ray of 4

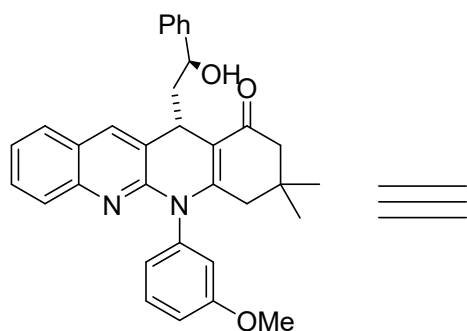

4

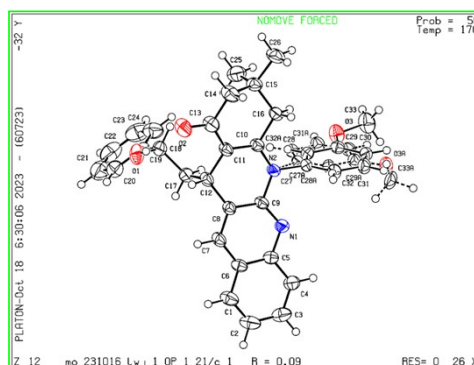

CCDC: 2306087

**Table 1 Crystal data and structure refinement for 4.**

|                                             |                                                               |
|---------------------------------------------|---------------------------------------------------------------|
| Identification code                         | mo_231016_LWJ_1_0m                                            |
| Empirical formula                           | C <sub>33</sub> H <sub>32</sub> N <sub>2</sub> O <sub>3</sub> |
| Formula weight                              | 504.60                                                        |
| Temperature/K                               | 170.00                                                        |
| Crystal system                              | monoclinic                                                    |
| Space group                                 | P2 <sub>1</sub> /c                                            |
| a/Å                                         | 11.9232(3)                                                    |
| b/Å                                         | 10.4301(4)                                                    |
| c/Å                                         | 22.0572(8)                                                    |
| α/°                                         | 90                                                            |
| β/°                                         | 100.9190(10)                                                  |
| γ/°                                         | 90                                                            |
| Volume/Å <sup>3</sup>                       | 2693.38(16)                                                   |
| Z                                           | 4                                                             |
| ρ <sub>calc</sub> /g/cm <sup>3</sup>        | 1.244                                                         |
| μ/mm <sup>-1</sup>                          | 0.080                                                         |
| F(000)                                      | 1072.0                                                        |
| Crystal size/mm <sup>3</sup>                | 0.45 × 0.16 × 0.1                                             |
| Radiation                                   | MoKα (λ = 0.71073)                                            |
| 2θ range for data collection/°              | 4.334 to 55.016                                               |
| Index ranges                                | -15 ≤ h ≤ 15, -13 ≤ k ≤ 13, -28 ≤ l ≤ 28                      |
| Reflections collected                       | 39856                                                         |
| Independent reflections                     | 6193 [R <sub>int</sub> = 0.0771, R <sub>sigma</sub> = 0.0488] |
| Data/restraints/parameters                  | 6193/284/421                                                  |
| Goodness-of-fit on F <sup>2</sup>           | 1.173                                                         |
| Final R indexes [I >= 2σ (I)]               | R <sub>1</sub> = 0.0875, wR <sub>2</sub> = 0.1551             |
| Final R indexes [all data]                  | R <sub>1</sub> = 0.1233, wR <sub>2</sub> = 0.1717             |
| Largest diff. peak/hole / e Å <sup>-3</sup> | 0.24/-0.27                                                    |

**Table 2 Fractional Atomic Coordinates ( $\times 10^4$ ) and Equivalent Isotropic Displacement Parameters ( $\text{\AA}^2 \times 10^3$ ) for 4.  $U_{\text{eq}}$  is defined as 1/3 of the trace of the orthogonalised  $U_{ij}$  tensor.**

| Atom | <i>x</i>   | <i>y</i> | <i>z</i>   | $U(\text{eq})$ |
|------|------------|----------|------------|----------------|
| O1   | -258.4(17) | 6600(3)  | 2797.4(11) | 52.8(6)        |
| N1   | 4973.1(19) | 4082(2)  | 3579.8(11) | 34.9(5)        |
| C1   | 3391(3)    | 1328(3)  | 2764.1(15) | 46.4(8)        |
| O2   | 552.8(17)  | 6844(3)  | 4092.3(11) | 57.6(7)        |
| N2   | 4383.1(18) | 6009(2)  | 3945.9(11) | 35.3(6)        |
| C2   | 4283(3)    | 566(3)   | 2691.3(17) | 52.4(9)        |
| O3   | 7453(2)    | 8544(3)  | 3544.7(12) | 44.8(7)        |
| O3A  | 8354(9)    | 6412(11) | 4761(5)    | 41(2)          |
| C3   | 5411(3)    | 970(3)   | 2909.6(16) | 51.3(9)        |
| C4   | 5633(3)    | 2126(3)  | 3197.0(15) | 42.1(7)        |
| C5   | 4722(2)    | 2926(3)  | 3284.7(13) | 33.8(6)        |
| C6   | 3591(2)    | 2524(3)  | 3065.7(13) | 34.6(6)        |
| C7   | 2708(2)    | 3360(3)  | 3148.0(13) | 35.7(6)        |
| C8   | 2942(2)    | 4520(3)  | 3424.9(13) | 31.2(6)        |
| C9   | 4113(2)    | 4820(3)  | 3638.0(13) | 31.1(6)        |
| C10  | 3554(2)    | 6719(3)  | 4154.9(13) | 32.7(6)        |
| C11  | 2424(2)    | 6456(3)  | 3959.8(13) | 33.5(6)        |
| C12  | 2033(2)    | 5515(3)  | 3447.6(13) | 34.3(6)        |
| C13  | 1583(3)    | 7094(3)  | 4246.8(15) | 44.4(8)        |
| C14  | 1982(3)    | 8053(4)  | 4752.0(17) | 54.4(10)       |
| C15  | 3064(3)    | 8753(3)  | 4678.4(14) | 39.3(7)        |
| C16  | 3966(2)    | 7746(3)  | 4626.6(14) | 38.3(7)        |
| C17  | 1758(2)    | 6161(3)  | 2808.2(14) | 38.7(7)        |
| C18  | 791(2)     | 7150(3)  | 2704.6(15) | 40.8(7)        |
| C19  | 635(2)     | 7629(3)  | 2051.3(15) | 41.2(7)        |
| C20  | -83(3)     | 7017(4)  | 1571.3(16) | 51.3(8)        |
| C21  | -174(3)    | 7423(4)  | 969.0(18)  | 64.7(11)       |
| C22  | 452(4)     | 8447(4)  | 833(2)     | 70.7(12)       |
| C23  | 1183(4)    | 9062(4)  | 1303(2)    | 75.4(13)       |
| C24  | 1273(3)    | 8656(3)  | 1909.9(19) | 59.9(10)       |
| C25  | 2860(3)    | 9616(3)  | 4109.7(17) | 57.2(9)        |
| C26  | 3483(3)    | 9584(3)  | 5250.5(16) | 54.5(9)        |
| C27  | 5598(3)    | 6337(3)  | 4126.9(17) | 29.2(8)        |
| C27A | 5470(11)   | 6680(16) | 3875(7)    | 28(2)          |
| C28  | 5994(3)    | 7225(3)  | 3763.0(16) | 29.5(7)        |
| C28A | 6333(11)   | 6286(15) | 4338(7)    | 30(2)          |

**Table 2 Fractional Atomic Coordinates ( $\times 10^4$ ) and Equivalent Isotropic Displacement Parameters ( $\text{\AA}^2 \times 10^3$ ) for 4.  $U_{\text{eq}}$  is defined as 1/3 of the trace of the orthogonalised  $U_{\text{IJ}}$  tensor.**

| Atom | $x$      | $y$      | $z$        | $U(\text{eq})$ |
|------|----------|----------|------------|----------------|
| C29  | 7136(3)  | 7609(4)  | 3913.8(17) | 30.7(8)        |
| C29A | 7422(12) | 6764(17) | 4335(8)    | 32(2)          |
| C30  | 7850(3)  | 7077(3)  | 4413.2(17) | 32.2(8)        |
| C30A | 7604(13) | 7634(18) | 3901(8)    | 33(2)          |
| C31  | 7426(3)  | 6183(4)  | 4773.2(17) | 38.6(8)        |
| C31A | 6743(11) | 8043(15) | 3435(7)    | 36(2)          |
| C32  | 6291(3)  | 5805(3)  | 4638.4(17) | 35.0(8)        |
| C32A | 5646(12) | 7541(14) | 3429(7)    | 31(2)          |
| C33  | 8560(3)  | 9101(4)  | 3732(2)    | 54.4(11)       |
| C33A | 8150(14) | 5417(16) | 5168(8)    | 47(4)          |

**Table 3 Anisotropic Displacement Parameters ( $\text{\AA}^2 \times 10^3$ ) for 4. The Anisotropic displacement factor exponent takes the form:  $-2\pi^2[h^2a^*2U_{11}+2hka^*b^*U_{12}+\dots]$ .**

| Atom | $U_{11}$ | $U_{22}$ | $U_{33}$ | $U_{23}$  | $U_{13}$ | $U_{12}$  |
|------|----------|----------|----------|-----------|----------|-----------|
| O1   | 26.4(11) | 75.7(17) | 56.8(14) | -0.6(13)  | 8.9(10)  | -4.7(11)  |
| N1   | 31.6(12) | 30.4(13) | 43.1(14) | -5.7(11)  | 7.6(10)  | -2.6(10)  |
| C1   | 50.2(19) | 38.4(18) | 55(2)    | -13.5(15) | 19.6(16) | -13.6(15) |
| O2   | 30.6(12) | 79.8(18) | 67.6(16) | -30.0(14) | 22.5(11) | -12.0(11) |
| N2   | 23.7(11) | 32.2(13) | 49.9(14) | -13.5(11) | 6.8(10)  | -5.0(9)   |
| C2   | 66(2)    | 34.7(18) | 63(2)    | -13.8(16) | 30.0(18) | -10.7(16) |
| O3   | 38.9(14) | 50.6(16) | 44.4(15) | 10.2(13)  | 7.0(11)  | -13.6(12) |
| O3A  | 31(4)    | 42(5)    | 47(5)    | 9(4)      | 0(4)     | -6(4)     |
| C3   | 58(2)    | 37.9(18) | 63(2)    | -5.5(16)  | 25.2(18) | 5.2(16)   |
| C4   | 42.4(17) | 35.2(17) | 50.1(19) | -2.5(14)  | 12.3(14) | 0.8(13)   |
| C5   | 39.9(15) | 28.0(14) | 35.1(15) | -1.0(12)  | 11.1(12) | -1.9(12)  |
| C6   | 41.7(16) | 27.5(14) | 37.0(16) | -4.0(12)  | 13.9(13) | -8.7(12)  |
| C7   | 30.1(14) | 36.3(16) | 41.5(16) | -6.5(13)  | 8.8(12)  | -11.6(12) |
| C8   | 26.6(13) | 32.7(15) | 35.1(15) | -3.5(12)  | 7.8(11)  | -6.2(11)  |
| C9   | 31.5(14) | 28.0(14) | 34.4(15) | -5.7(12)  | 7.8(11)  | -6.7(11)  |
| C10  | 30.9(14) | 31.0(15) | 37.4(15) | -5.9(12)  | 9.6(12)  | -4.6(11)  |
| C11  | 27.9(14) | 37.5(16) | 37.0(15) | -9.9(13)  | 11.2(11) | -7.9(12)  |
| C12  | 26.0(13) | 41.1(17) | 37.0(15) | -10.6(13) | 8.7(11)  | -8.0(12)  |
| C13  | 34.8(16) | 53(2)    | 50.1(19) | -15.4(16) | 19.3(14) | -9.1(14)  |
| C14  | 44.1(18) | 67(2)    | 58(2)    | -29.4(19) | 25.9(16) | -13.5(17) |
| C15  | 38.0(16) | 37.2(17) | 45.3(17) | -10.5(14) | 15.0(13) | -2.5(13)  |

**Table 3 Anisotropic Displacement Parameters ( $\text{\AA}^2 \times 10^3$ ) for 4. The Anisotropic displacement factor exponent takes the form:  $-2\pi^2[h^2a^*U_{11}+2hka^*b^*U_{12}+\dots]$ .**

| Atom | $U_{11}$ | $U_{22}$ | $U_{33}$ | $U_{23}$  | $U_{13}$ | $U_{12}$ |
|------|----------|----------|----------|-----------|----------|----------|
| C16  | 32.4(15) | 36.2(16) | 45.6(17) | -12.6(14) | 5.7(13)  | -4.7(12) |
| C17  | 31.0(15) | 42.0(17) | 43.8(17) | -11.1(14) | 8.5(12)  | 1.6(13)  |
| C18  | 27.5(14) | 45.2(18) | 50.3(18) | -9.4(15)  | 8.4(13)  | -0.4(13) |
| C19  | 32.8(15) | 35.4(16) | 55.8(19) | -6.6(15)  | 9.5(14)  | 9.3(13)  |
| C20  | 47.5(19) | 53(2)    | 53(2)    | -2.7(17)  | 8.3(16)  | 3.9(16)  |
| C21  | 66(2)    | 71(3)    | 56(2)    | -1(2)     | 8.1(19)  | 14(2)    |
| C22  | 79(3)    | 74(3)    | 64(3)    | 11(2)     | 25(2)    | 29(2)    |
| C23  | 94(3)    | 47(2)    | 95(3)    | 17(2)     | 41(3)    | 8(2)     |
| C24  | 69(2)    | 41(2)    | 72(3)    | -3.9(19)  | 19(2)    | -2.3(18) |
| C25  | 66(2)    | 44(2)    | 61(2)    | -3.1(18)  | 10.5(18) | 7.4(18)  |
| C26  | 53(2)    | 55(2)    | 58(2)    | -29.3(18) | 17.4(17) | -7.7(17) |
| C27  | 23.7(16) | 27.2(18) | 35.4(19) | -2.9(15)  | 2.0(14)  | -2.8(13) |
| C27A | 23(4)    | 26(4)    | 35(5)    | -7(4)     | 4(4)     | -1(4)    |
| C28  | 30.2(16) | 27.5(16) | 29.7(17) | 0.7(14)   | 3.1(13)  | 1.3(13)  |
| C28A | 26(4)    | 28(4)    | 33(4)    | 2(4)      | 1(4)     | -1(3)    |
| C29  | 33.2(18) | 27.7(16) | 32.5(16) | -1.4(13)  | 9.2(15)  | -3.3(16) |
| C29A | 28(4)    | 31(4)    | 37(4)    | 2(3)      | 3(3)     | -5(3)    |
| C30  | 26.9(17) | 29.9(18) | 39.1(18) | -0.7(15)  | 4.2(15)  | -1.5(14) |
| C30A | 31(4)    | 31(4)    | 38(4)    | 0(4)      | 8(4)     | -5(4)    |
| C31  | 34.5(18) | 36.9(19) | 40.4(18) | 6.5(15)   | -2.5(15) | -1.2(15) |
| C31A | 35(4)    | 34(4)    | 38(4)    | 1(4)      | 4(4)     | -7(4)    |
| C32  | 32.7(17) | 32.2(18) | 38.5(19) | 8.6(16)   | 3.0(14)  | -5.0(14) |
| C32A | 28(4)    | 29(4)    | 36(4)    | -1(4)     | 3(4)     | 0(4)     |
| C33  | 45(2)    | 58(3)    | 61(3)    | 14(2)     | 11.0(19) | -20(2)   |
| C33A | 35(8)    | 45(9)    | 53(9)    | 15(8)     | -8(7)    | 9(7)     |

**Table 4 Bond Lengths for 4.**

| Atom Atom | Length/ $\text{\AA}$ | Atom Atom | Length/ $\text{\AA}$ |
|-----------|----------------------|-----------|----------------------|
| O1 C18    | 1.426(3)             | C12 C17   | 1.541(4)             |
| N1 C5     | 1.376(4)             | C13 C14   | 1.506(4)             |
| N1 C9     | 1.308(3)             | C14 C15   | 1.517(4)             |
| C1 C2     | 1.361(5)             | C15 C16   | 1.524(4)             |
| C1 C6     | 1.413(4)             | C15 C25   | 1.526(5)             |
| O2 C13    | 1.239(3)             | C15 C26   | 1.535(4)             |
| N2 C9     | 1.421(3)             | C17 C18   | 1.532(4)             |
| N2 C10    | 1.382(3)             | C18 C19   | 1.503(5)             |

**Table 4 Bond Lengths for 4.**

| Atom | Atom | Length/Å  | Atom | Atom | Length/Å  |
|------|------|-----------|------|------|-----------|
| N2   | C27  | 1.469(4)  | C19  | C20  | 1.384(5)  |
| N2   | C27A | 1.507(13) | C19  | C24  | 1.383(5)  |
| C2   | C3   | 1.404(5)  | C20  | C21  | 1.378(5)  |
| O3   | C29  | 1.369(4)  | C21  | C22  | 1.369(6)  |
| O3   | C33  | 1.430(4)  | C22  | C23  | 1.379(6)  |
| O3A  | C29A | 1.364(14) | C23  | C24  | 1.389(6)  |
| O3A  | C33A | 1.422(14) | C27  | C28  | 1.366(5)  |
| C3   | C4   | 1.365(4)  | C27  | C32  | 1.382(5)  |
| C4   | C5   | 1.411(4)  | C27A | C28A | 1.369(14) |
| C5   | C6   | 1.407(4)  | C27A | C32A | 1.377(15) |
| C6   | C7   | 1.404(4)  | C28  | C29  | 1.397(5)  |
| C7   | C8   | 1.361(4)  | C28A | C29A | 1.391(15) |
| C8   | C9   | 1.421(4)  | C29  | C30  | 1.375(5)  |
| C8   | C12  | 1.509(4)  | C29A | C30A | 1.365(15) |
| C10  | C11  | 1.363(4)  | C30  | C31  | 1.381(5)  |
| C10  | C16  | 1.509(4)  | C30A | C31A | 1.376(15) |
| C11  | C12  | 1.502(4)  | C31  | C32  | 1.387(5)  |
| C11  | C13  | 1.445(4)  | C31A | C32A | 1.407(15) |

**Table 5 Bond Angles for 4.**

| Atom | Atom | Atom | Angle/°   | Atom | Atom | Atom | Angle/°  |
|------|------|------|-----------|------|------|------|----------|
| C9   | N1   | C5   | 117.3(2)  | C14  | C15  | C25  | 111.5(3) |
| C2   | C1   | C6   | 120.3(3)  | C14  | C15  | C26  | 109.6(3) |
| C9   | N2   | C27  | 117.1(2)  | C16  | C15  | C25  | 110.5(3) |
| C9   | N2   | C27A | 118.5(7)  | C16  | C15  | C26  | 109.0(3) |
| C10  | N2   | C9   | 121.0(2)  | C25  | C15  | C26  | 108.6(3) |
| C10  | N2   | C27  | 121.0(2)  | C10  | C16  | C15  | 113.5(2) |
| C10  | N2   | C27A | 118.0(7)  | C18  | C17  | C12  | 117.0(2) |
| C1   | C2   | C3   | 120.2(3)  | O1   | C18  | C17  | 111.3(3) |
| C29  | O3   | C33  | 117.5(3)  | O1   | C18  | C19  | 108.6(2) |
| C29A | O3A  | C33A | 114.7(11) | C19  | C18  | C17  | 108.6(2) |
| C4   | C3   | C2   | 120.9(3)  | C20  | C19  | C18  | 121.8(3) |
| C3   | C4   | C5   | 120.0(3)  | C24  | C19  | C18  | 120.0(3) |
| N1   | C5   | C4   | 118.6(3)  | C24  | C19  | C20  | 118.1(3) |
| N1   | C5   | C6   | 122.1(3)  | C21  | C20  | C19  | 121.4(4) |
| C6   | C5   | C4   | 119.3(3)  | C22  | C21  | C20  | 120.2(4) |
| C5   | C6   | C1   | 119.3(3)  | C21  | C22  | C23  | 119.5(4) |

**Table 5 Bond Angles for 4.**

| Atom | Atom | Atom | Angle/°  | Atom | Atom | Atom | Angle/°   |
|------|------|------|----------|------|------|------|-----------|
| C7   | C6   | C1   | 123.0(3) | C22  | C23  | C24  | 120.3(4)  |
| C7   | C6   | C5   | 117.6(3) | C19  | C24  | C23  | 120.6(4)  |
| C8   | C7   | C6   | 121.0(3) | C28  | C27  | N2   | 115.5(3)  |
| C7   | C8   | C9   | 116.7(3) | C28  | C27  | C32  | 122.2(3)  |
| C7   | C8   | C12  | 122.7(2) | C32  | C27  | N2   | 122.3(3)  |
| C9   | C8   | C12  | 120.3(2) | C28A | C27A | N2   | 108.8(10) |
| N1   | C9   | N2   | 116.7(2) | C28A | C27A | C32A | 122.3(12) |
| N1   | C9   | C8   | 125.3(2) | C32A | C27A | N2   | 128.9(11) |
| N2   | C9   | C8   | 118.0(2) | C27  | C28  | C29  | 118.9(3)  |
| N2   | C10  | C16  | 116.8(2) | C27A | C28A | C29A | 117.3(13) |
| C11  | C10  | N2   | 120.9(2) | O3   | C29  | C28  | 115.4(3)  |
| C11  | C10  | C16  | 122.2(2) | O3   | C29  | C30  | 124.4(3)  |
| C10  | C11  | C12  | 121.1(2) | C30  | C29  | C28  | 120.2(3)  |
| C10  | C11  | C13  | 119.7(3) | O3A  | C29A | C28A | 122.6(12) |
| C13  | C11  | C12  | 119.2(2) | O3A  | C29A | C30A | 116.4(12) |
| C8   | C12  | C17  | 107.4(2) | C30A | C29A | C28A | 121.0(12) |
| C11  | C12  | C8   | 110.6(2) | C29  | C30  | C31  | 119.6(3)  |
| C11  | C12  | C17  | 112.6(2) | C29A | C30A | C31A | 122.3(14) |
| O2   | C13  | C11  | 121.1(3) | C30  | C31  | C32  | 121.2(3)  |
| O2   | C13  | C14  | 120.1(3) | C30A | C31A | C32A | 116.9(13) |
| C11  | C13  | C14  | 118.8(3) | C27  | C32  | C31  | 117.9(3)  |
| C13  | C14  | C15  | 113.4(2) | C27A | C32A | C31A | 120.2(13) |
| C14  | C15  | C16  | 107.6(3) |      |      |      |           |

**Table 6 Torsion Angles for 4.**

| A  | B   | C   | D   | Angle/°   | A   | B   | C   | D   | Angle/°   |
|----|-----|-----|-----|-----------|-----|-----|-----|-----|-----------|
| O1 | C18 | C19 | C20 | -33.0(4)  | C11 | C12 | C17 | C18 | -62.1(3)  |
| O1 | C18 | C19 | C24 | 151.2(3)  | C11 | C13 | C14 | C15 | 30.9(5)   |
| N1 | C5  | C6  | C1  | 179.8(3)  | C12 | C8  | C9  | N1  | -172.4(3) |
| N1 | C5  | C6  | C7  | 1.1(4)    | C12 | C8  | C9  | N2  | 8.4(4)    |
| C1 | C2  | C3  | C4  | 0.0(5)    | C12 | C11 | C13 | O2  | 2.5(5)    |
| C1 | C6  | C7  | C8  | -178.0(3) | C12 | C11 | C13 | C14 | -178.9(3) |
| O2 | C13 | C14 | C15 | -150.5(3) | C12 | C17 | C18 | O1  | -58.6(3)  |
| N2 | C10 | C11 | C12 | -8.6(4)   | C12 | C17 | C18 | C19 | -178.1(2) |
| N2 | C10 | C11 | C13 | 171.6(3)  | C13 | C11 | C12 | C8  | -152.1(3) |
| N2 | C10 | C16 | C15 | 161.1(3)  | C13 | C11 | C12 | C17 | 87.7(3)   |
| N2 | C27 | C28 | C29 | 178.6(3)  | C13 | C14 | C15 | C16 | -54.7(4)  |

**Table 6 Torsion Angles for 4.**

| A   | B    | C    | D    | Angle/°    | A    | B    | C    | D    | Angle/°    |
|-----|------|------|------|------------|------|------|------|------|------------|
| N2  | C27  | C32  | C31  | -179.6(3)  | C13  | C14  | C15  | C25  | 66.6(4)    |
| N2  | C27A | C28A | C29A | 177.3(14)  | C13  | C14  | C15  | C26  | -173.2(3)  |
| N2  | C27A | C32A | C31A | -178.5(14) | C14  | C15  | C16  | C10  | 50.1(3)    |
| C2  | C1   | C6   | C5   | 0.6(5)     | C16  | C10  | C11  | C12  | 174.3(3)   |
| C2  | C1   | C6   | C7   | 179.2(3)   | C16  | C10  | C11  | C13  | -5.5(5)    |
| C2  | C3   | C4   | C5   | 0.8(5)     | C17  | C18  | C19  | C20  | 88.2(3)    |
| O3  | C29  | C30  | C31  | 176.8(4)   | C17  | C18  | C19  | C24  | -87.5(3)   |
| O3A | C29A | C30A | C31A | 178.3(18)  | C18  | C19  | C20  | C21  | -176.5(3)  |
| C3  | C4   | C5   | N1   | 179.5(3)   | C18  | C19  | C24  | C23  | 176.4(3)   |
| C3  | C4   | C5   | C6   | -0.9(5)    | C19  | C20  | C21  | C22  | 0.1(6)     |
| C4  | C5   | C6   | C1   | 0.2(4)     | C20  | C19  | C24  | C23  | 0.5(5)     |
| C4  | C5   | C6   | C7   | -178.5(3)  | C20  | C21  | C22  | C23  | 0.7(6)     |
| C5  | N1   | C9   | N2   | 179.7(2)   | C21  | C22  | C23  | C24  | -0.9(6)    |
| C5  | N1   | C9   | C8   | 0.5(4)     | C22  | C23  | C24  | C19  | 0.3(6)     |
| C5  | C6   | C7   | C8   | 0.6(4)     | C24  | C19  | C20  | C21  | -0.7(5)    |
| C6  | C1   | C2   | C3   | -0.7(5)    | C25  | C15  | C16  | C10  | -71.8(3)   |
| C6  | C7   | C8   | C9   | -1.6(4)    | C26  | C15  | C16  | C10  | 168.9(3)   |
| C6  | C7   | C8   | C12  | 171.7(3)   | C27  | N2   | C9   | N1   | 4.5(4)     |
| C7  | C8   | C9   | N1   | 1.1(4)     | C27  | N2   | C9   | C8   | -176.2(3)  |
| C7  | C8   | C9   | N2   | -178.1(3)  | C27  | N2   | C10  | C11  | 176.4(3)   |
| C7  | C8   | C12  | C11  | 159.2(3)   | C27  | N2   | C10  | C16  | -6.3(4)    |
| C7  | C8   | C12  | C17  | -77.5(3)   | C27  | C28  | C29  | O3   | -177.0(3)  |
| C8  | C12  | C17  | C18  | 175.9(2)   | C27  | C28  | C29  | C30  | 1.4(5)     |
| C9  | N1   | C5   | C4   | 178.0(3)   | C27A | N2   | C9   | N1   | 33.2(7)    |
| C9  | N1   | C5   | C6   | -1.6(4)    | C27A | N2   | C9   | C8   | -147.4(7)  |
| C9  | N2   | C10  | C11  | -14.4(4)   | C27A | N2   | C10  | C11  | 147.3(7)   |
| C9  | N2   | C10  | C16  | 162.9(3)   | C27A | N2   | C10  | C16  | -35.4(7)   |
| C9  | N2   | C27  | C28  | 103.4(3)   | C27A | C28A | C29A | O3A  | -178.1(17) |
| C9  | N2   | C27  | C32  | -77.9(4)   | C27A | C28A | C29A | C30A | 3(3)       |
| C9  | N2   | C27A | C28A | -90.8(13)  | C28  | C27  | C32  | C31  | -1.0(6)    |
| C9  | N2   | C27A | C32A | 88.3(18)   | C28  | C29  | C30  | C31  | -1.5(6)    |
| C9  | C8   | C12  | C11  | -27.7(4)   | C28A | C27A | C32A | C31A | 0(3)       |
| C9  | C8   | C12  | C17  | 95.6(3)    | C28A | C29A | C30A | C31A | -3(3)      |
| C10 | N2   | C9   | N1   | -165.1(3)  | C29  | C30  | C31  | C32  | 0.3(6)     |
| C10 | N2   | C9   | C8   | 14.2(4)    | C29A | C30A | C31A | C32A | 1(3)       |
| C10 | N2   | C27  | C28  | -87.0(4)   | C30  | C31  | C32  | C27  | 0.9(6)     |
| C10 | N2   | C27  | C32  | 91.7(4)    | C30A | C31A | C32A | C27A | 0(3)       |
| C10 | N2   | C27A | C28A | 107.0(12)  | C32  | C27  | C28  | C29  | -0.1(5)    |



**Table 6 Torsion Angles for 4.**

| A   | B   | C    | D    | Angle/°   | A    | B    | C    | D    | Angle/°    |
|-----|-----|------|------|-----------|------|------|------|------|------------|
| C10 | N2  | C27A | C32A | -73.9(18) | C32A | C27A | C28A | C29A | -2(3)      |
| C10 | C11 | C12  | C8   | 28.1(4)   | C33  | O3   | C29  | C28  | 171.2(3)   |
| C10 | C11 | C12  | C17  | -92.1(3)  | C33  | O3   | C29  | C30  | -7.2(6)    |
| C10 | C11 | C13  | O2   | -177.7(3) | C33A | O3A  | C29A | C28A | 7(3)       |
| C10 | C11 | C13  | C14  | 0.9(5)    | C33A | O3A  | C29A | C30A | -174.3(18) |
| C11 | C10 | C16  | C15  | -21.7(4)  |      |      |      |      |            |

**Table 7 Hydrogen Atom Coordinates ( $\text{\AA}\times 10^4$ ) and Isotropic Displacement Parameters ( $\text{\AA}^2\times 10^3$ ) for 4.**

| Atom | x       | y        | z       | U(eq) |
|------|---------|----------|---------|-------|
| H1   | -214.01 | 6431.12  | 3173.54 | 79    |
| H1A  | 2630.13 | 1053.58  | 2611.39 | 56    |
| H2   | 4142.46 | -241.56  | 2492.19 | 63    |
| H3   | 6027.6  | 431.04   | 2856.56 | 62    |
| H4   | 6400    | 2392.94  | 3337.78 | 51    |
| H7   | 1936.41 | 3110.29  | 3008.31 | 43    |
| H12  | 1329.39 | 5073.99  | 3526.48 | 41    |
| H14A | 2120.25 | 7603.54  | 5154.5  | 65    |
| H14B | 1368.45 | 8689.95  | 4757.43 | 65    |
| H16A | 4638.93 | 8175.48  | 4515.21 | 46    |
| H16B | 4214.38 | 7336.16  | 5034.89 | 46    |
| H17A | 2461.07 | 6587.68  | 2733.23 | 46    |
| H17B | 1564.87 | 5480.29  | 2493.05 | 46    |
| H18  | 998.05  | 7884.31  | 2995.9  | 49    |
| H20  | -521.9  | 6304.33  | 1658.65 | 62    |
| H21  | -672.73 | 6989.03  | 647.11  | 78    |
| H22  | 382.8   | 8733.13  | 418.8   | 85    |
| H23  | 1628.23 | 9765.82  | 1210.82 | 90    |
| H24  | 1775.99 | 9087.31  | 2230.63 | 72    |
| H25A | 3568.14 | 10067.98 | 4080.15 | 86    |
| H25B | 2262.45 | 10242.3  | 4144.75 | 86    |
| H25C | 2617.84 | 9093.03  | 3739.01 | 86    |
| H26A | 3615.36 | 9041.3   | 5619.88 | 82    |
| H26B | 2905.1  | 10232.04 | 5287.82 | 82    |
| H26C | 4197.96 | 10009.69 | 5209.32 | 82    |
| H28  | 5500.85 | 7574.97  | 3413.17 | 35    |
| H28A | 6194.82 | 5710.13  | 4649.44 | 36    |

**Table 7 Hydrogen Atom Coordinates ( $\text{\AA}\times 10^4$ ) and Isotropic Displacement Parameters ( $\text{\AA}^2\times 10^3$ ) for 4.**

| Atom | <i>x</i> | <i>y</i> | <i>z</i> | U(eq) |
|------|----------|----------|----------|-------|
| H30  | 8630.25  | 7323.69  | 4510.16  | 39    |
| H30A | 8351.95  | 7967.87  | 3921.77  | 39    |
| H31  | 7920.42  | 5821.06  | 5119.12  | 46    |
| H31A | 6883.21  | 8638.32  | 3131.96  | 43    |
| H32  | 5998.03  | 5199.53  | 4890.07  | 42    |
| H32A | 5025.31  | 7796.29  | 3115.83  | 38    |
| H33A | 8614.64  | 9880.26  | 3490.76  | 82    |
| H33B | 9143.34  | 8486.56  | 3660.39  | 82    |
| H33C | 8680.64  | 9316.98  | 4171.49  | 82    |
| H33D | 7701.13  | 4735.3   | 4929.83  | 70    |
| H33E | 7727.11  | 5762.54  | 5471.25  | 70    |
| H33F | 8880.95  | 5066.7   | 5381.85  | 70    |

**Table 8 Atomic Occupancy for 4.**

| Atom | Occupancy | Atom | Occupancy | Atom | Occupancy |
|------|-----------|------|-----------|------|-----------|
| O3   | 0.823(3)  | O3A  | 0.177(3)  | C27  | 0.823(3)  |
| C27A | 0.177(3)  | C28  | 0.823(3)  | H28  | 0.823(3)  |
| C28A | 0.177(3)  | H28A | 0.177(3)  | C29  | 0.823(3)  |
| C29A | 0.177(3)  | C30  | 0.823(3)  | H30  | 0.823(3)  |
| C30A | 0.177(3)  | H30A | 0.177(3)  | C31  | 0.823(3)  |
| H31  | 0.823(3)  | C31A | 0.177(3)  | H31A | 0.177(3)  |
| C32  | 0.823(3)  | H32  | 0.823(3)  | C32A | 0.177(3)  |
| H32A | 0.177(3)  | C33  | 0.823(3)  | H33A | 0.823(3)  |
| H33B | 0.823(3)  | H33C | 0.823(3)  | C33A | 0.177(3)  |
| H33D | 0.177(3)  | H33E | 0.177(3)  | H33F | 0.177(3)  |

## 5. NMR Spectra

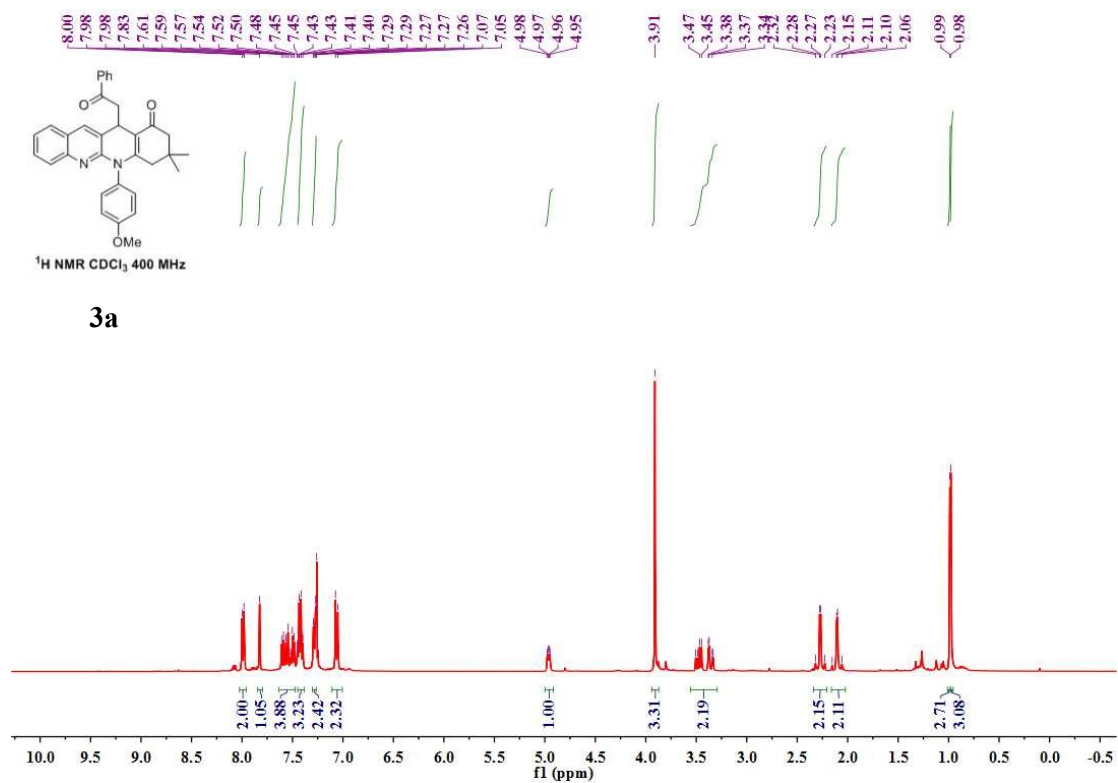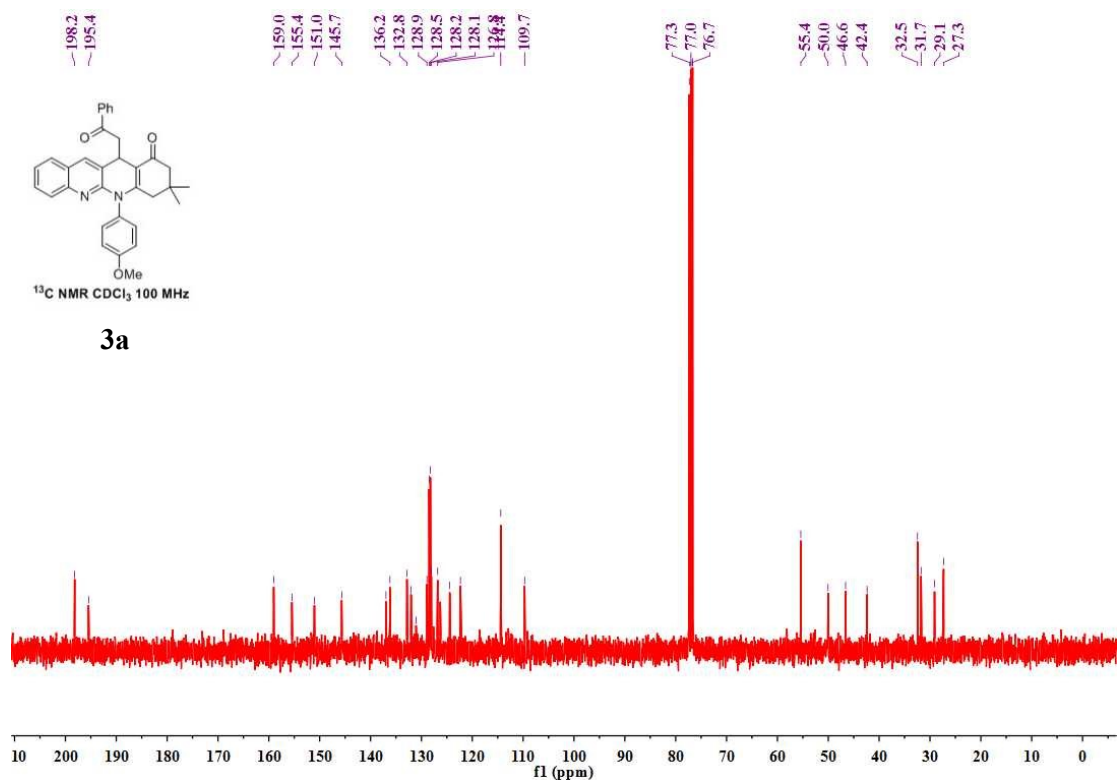

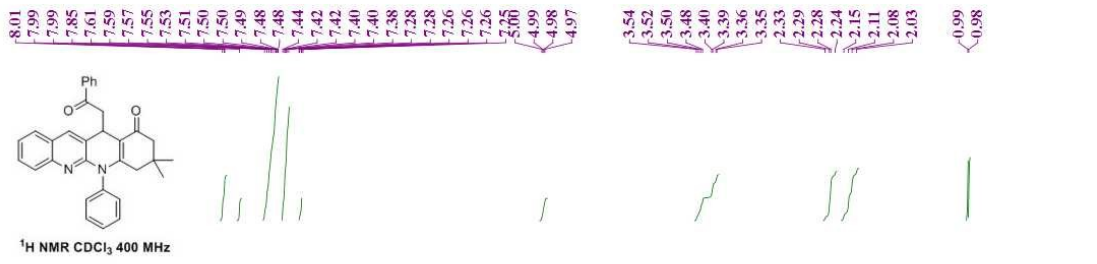

**3b**

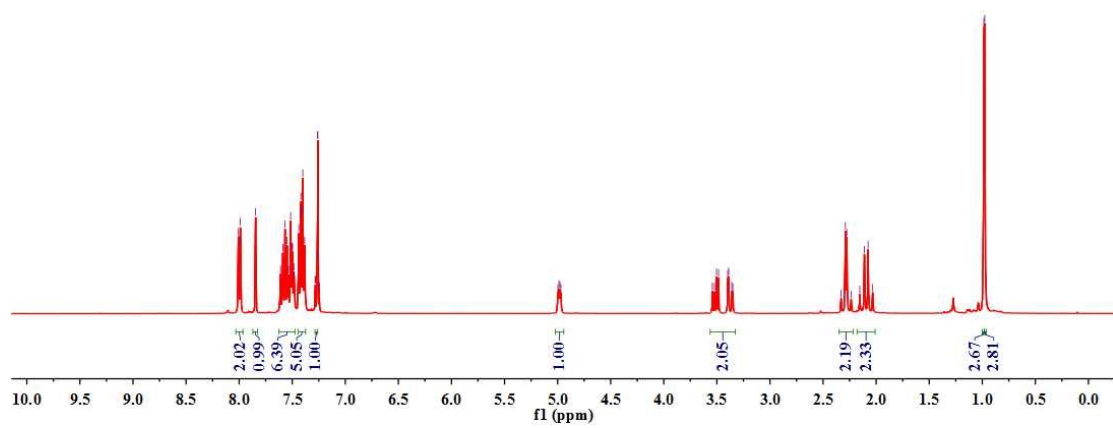

**3b**

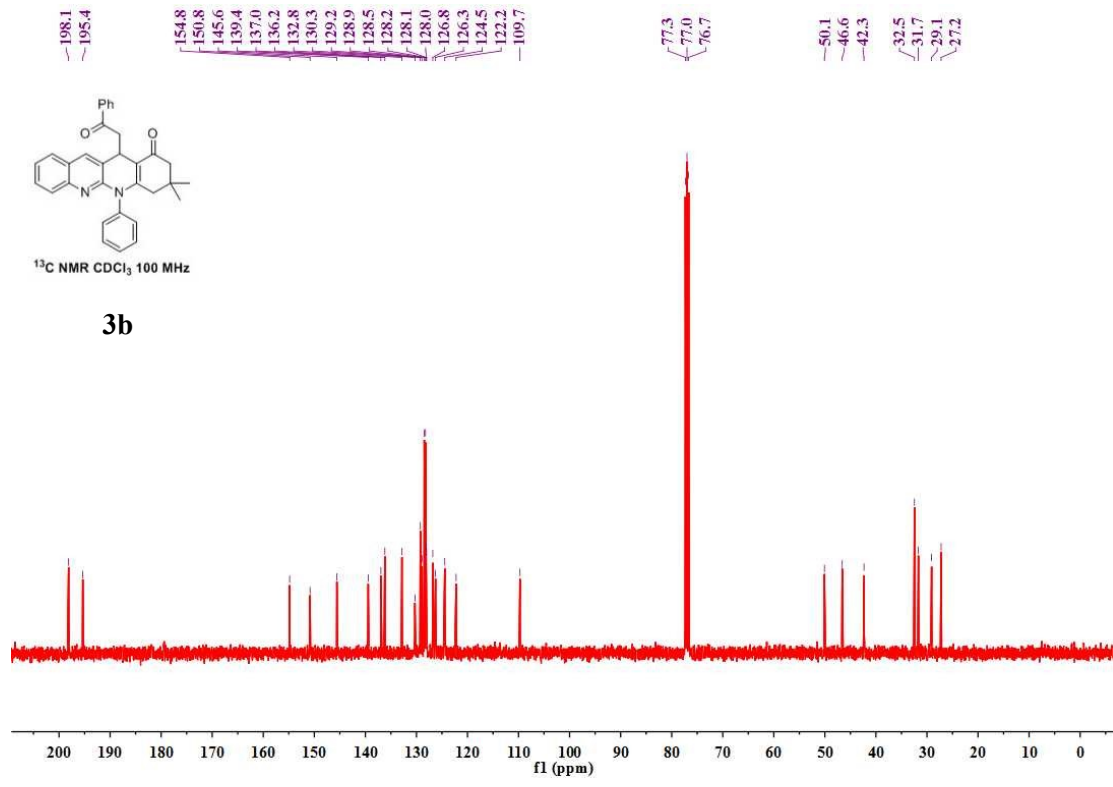

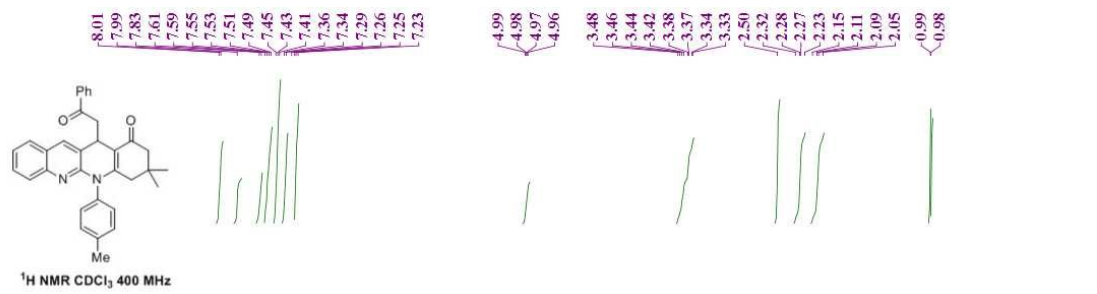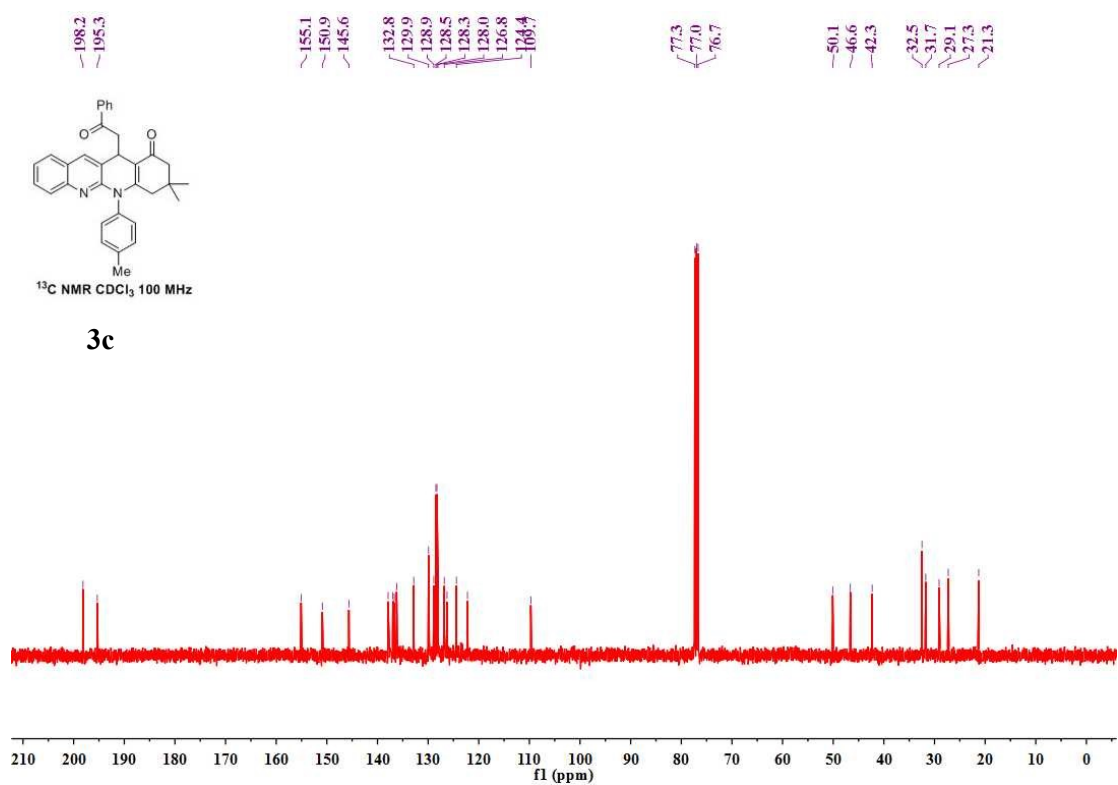

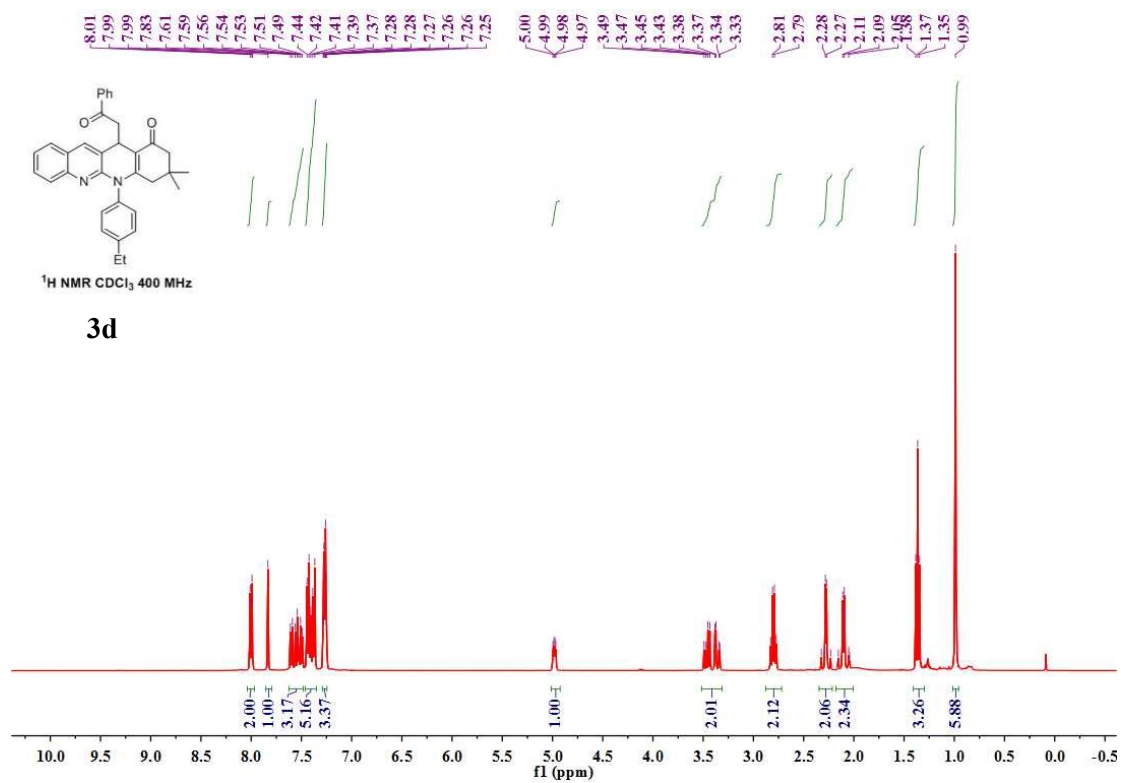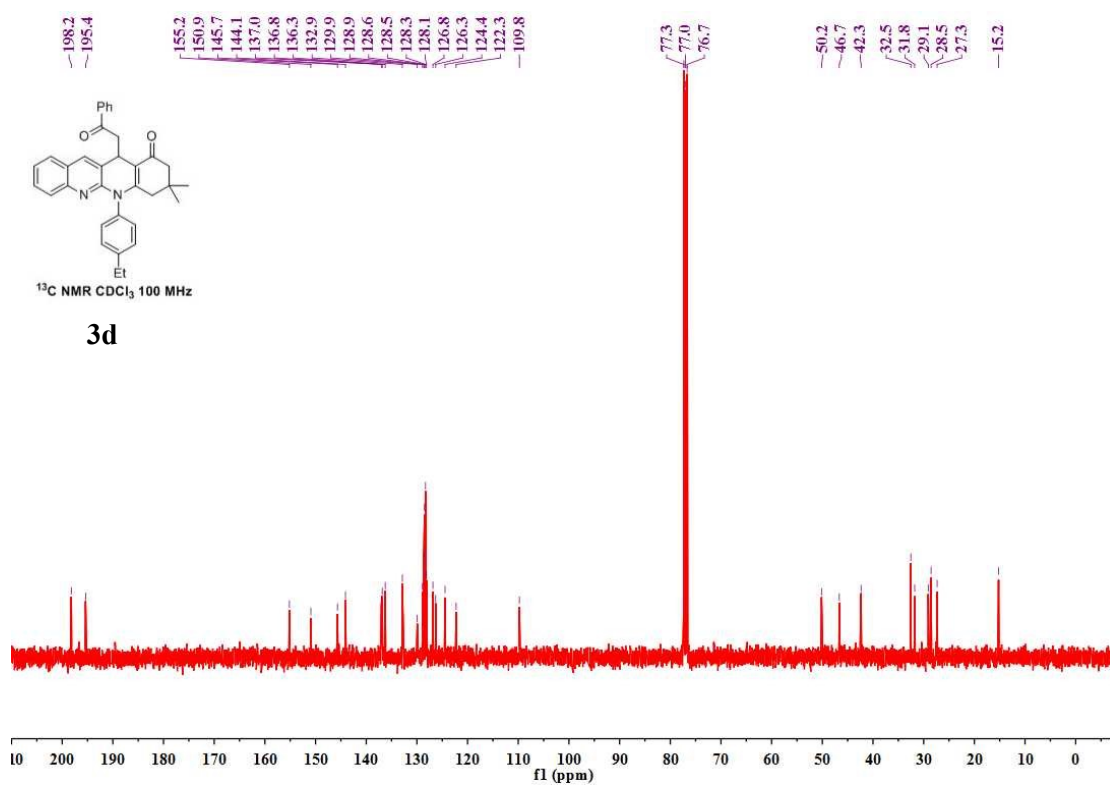

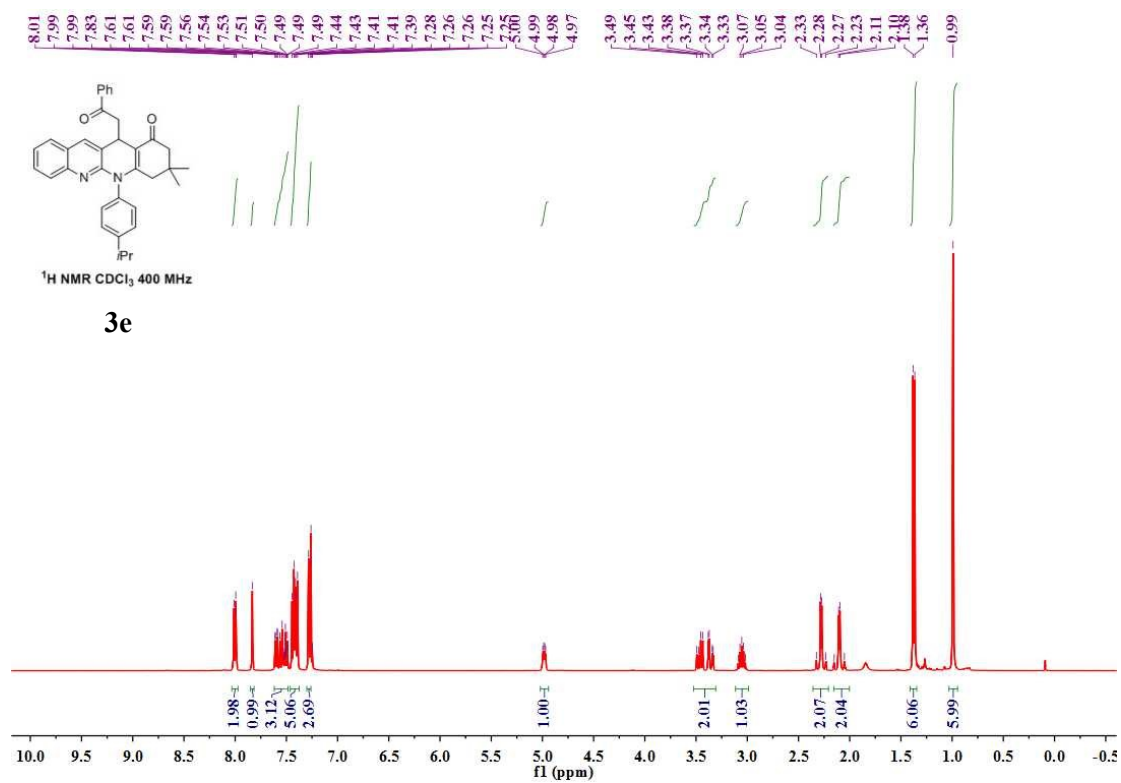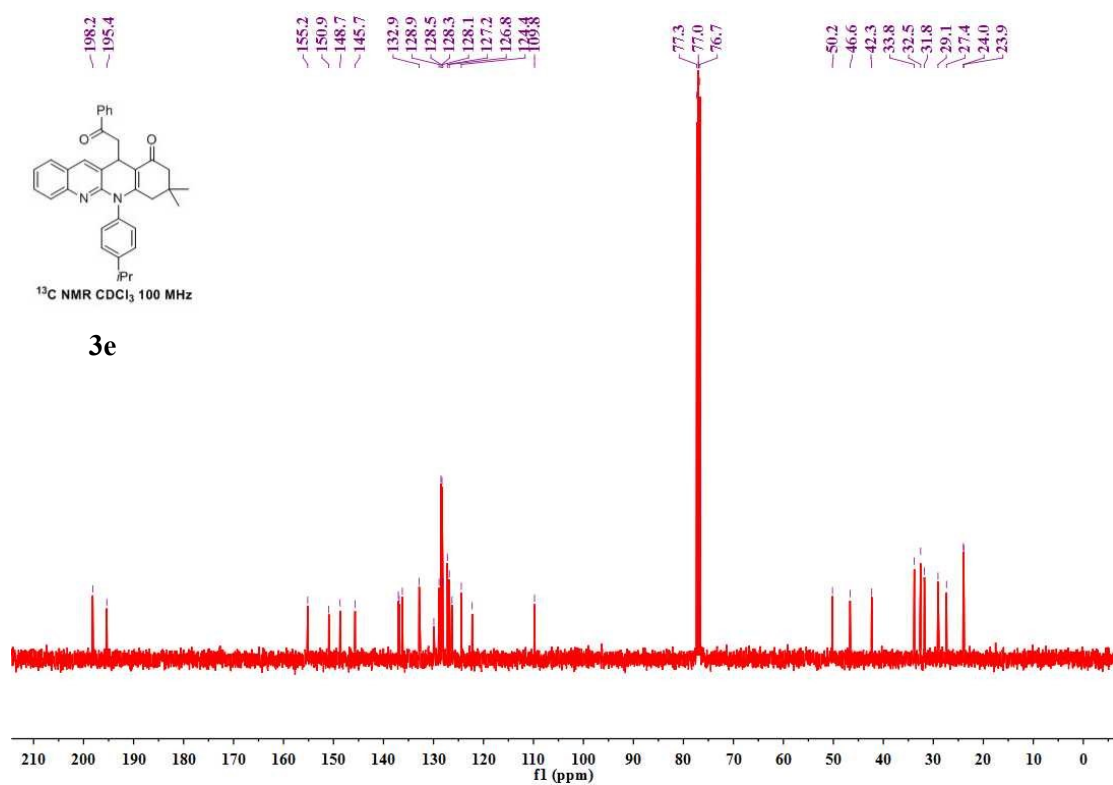

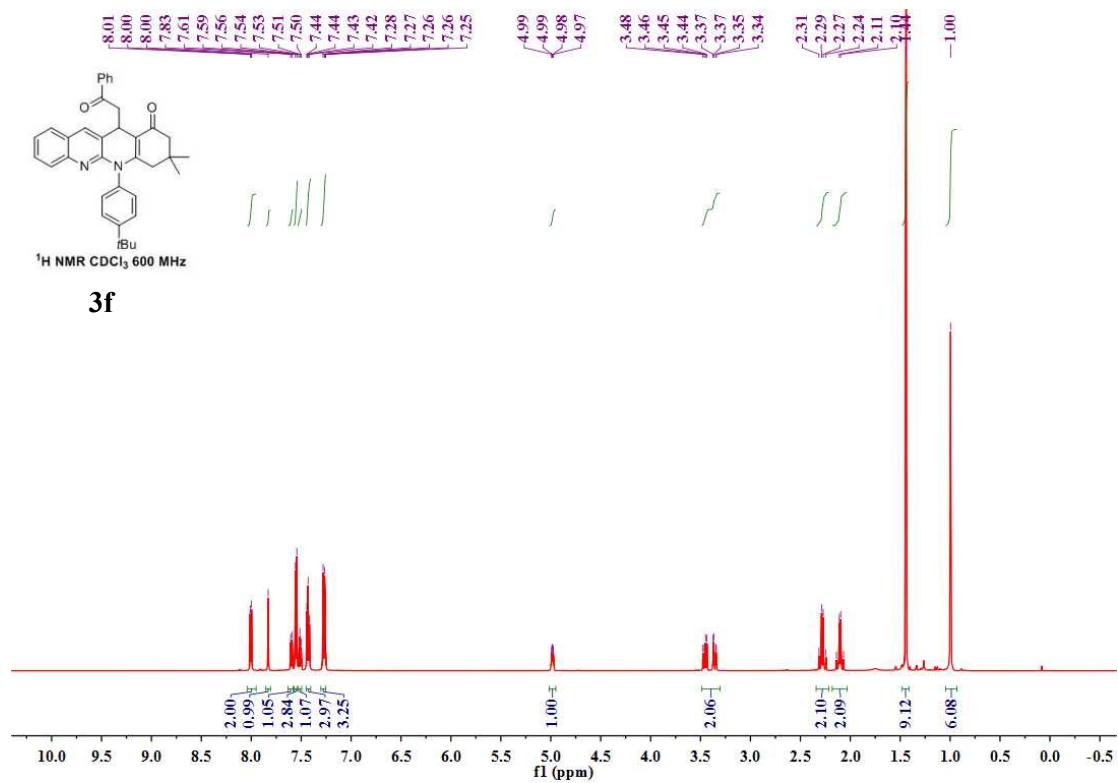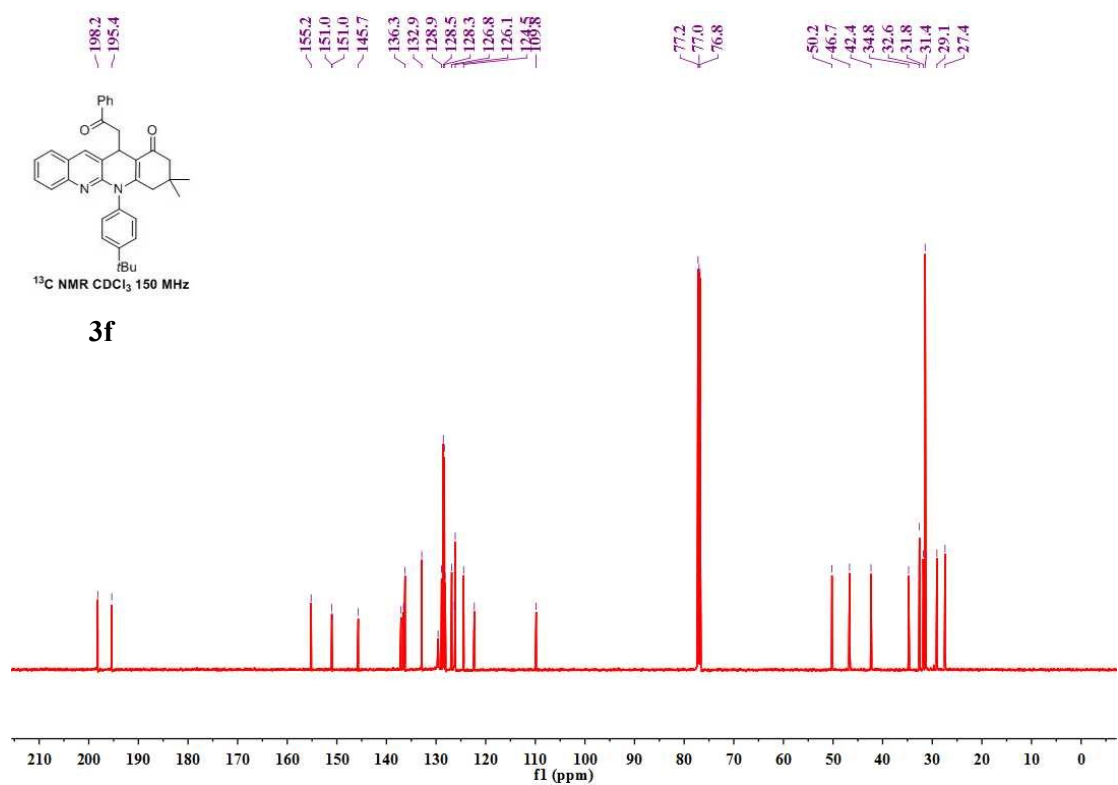



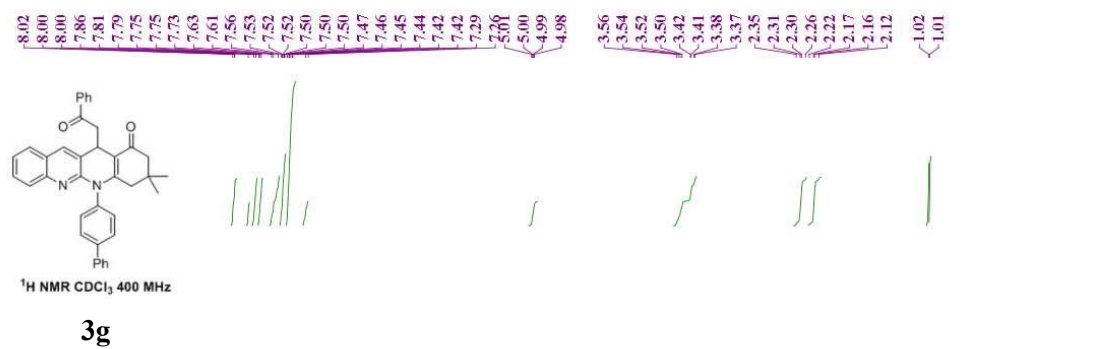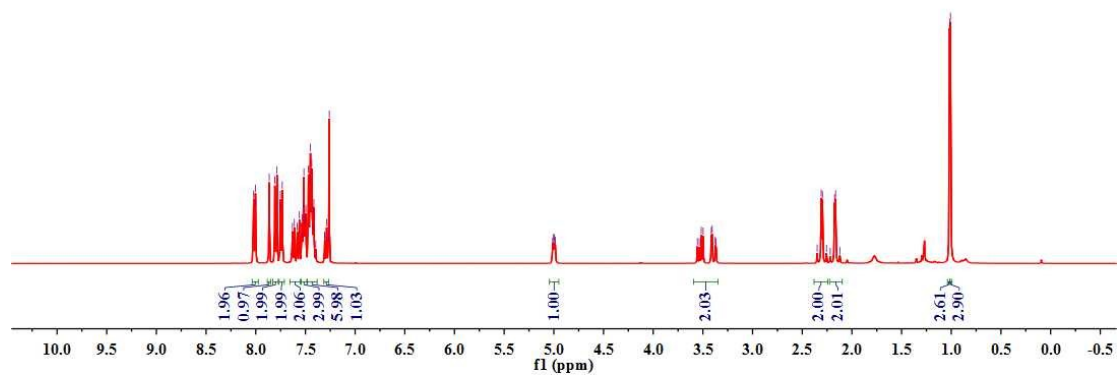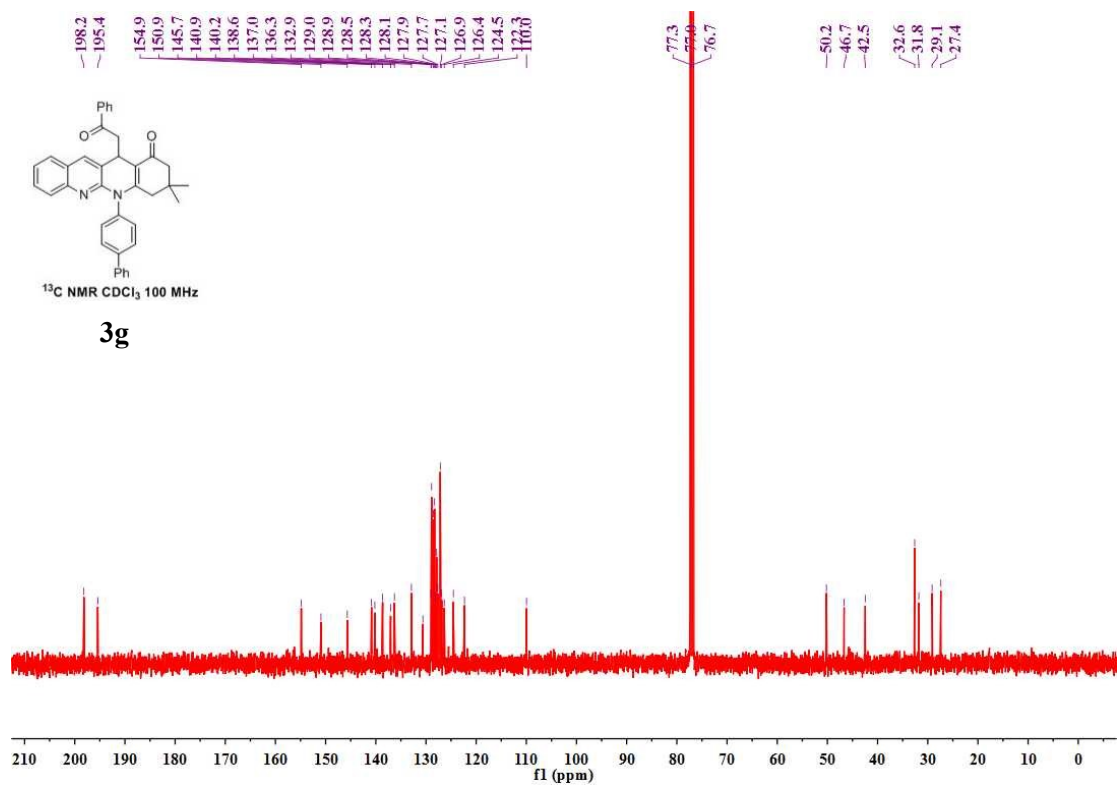

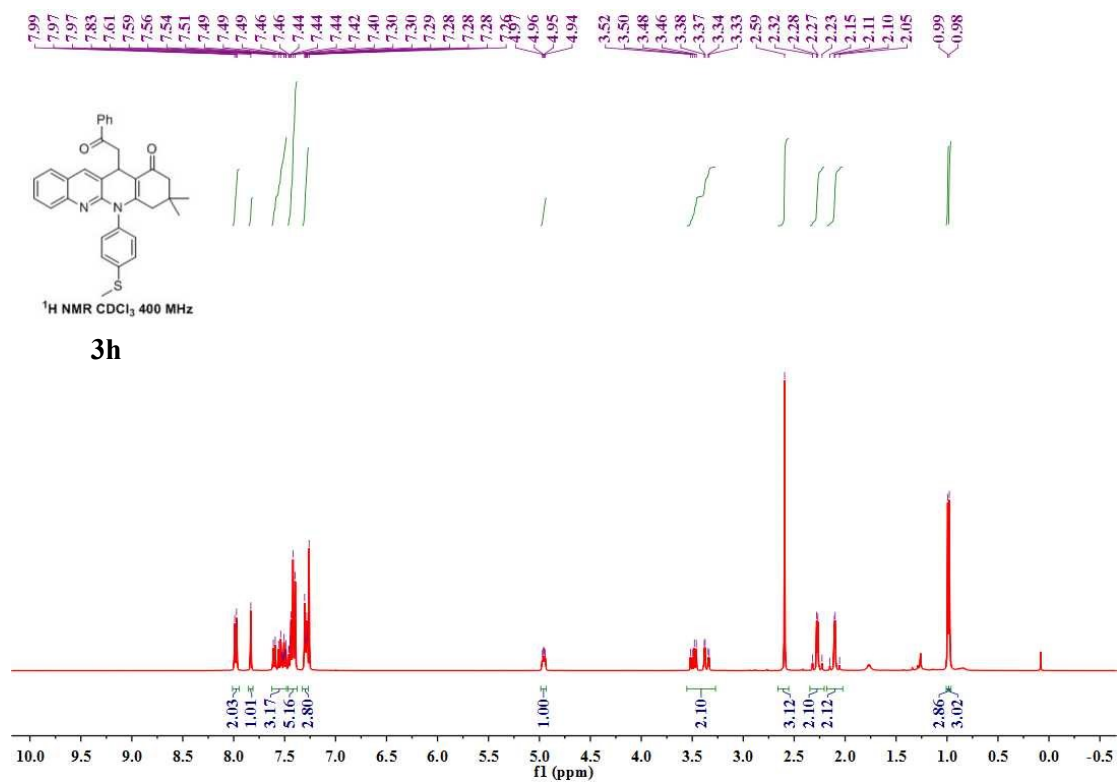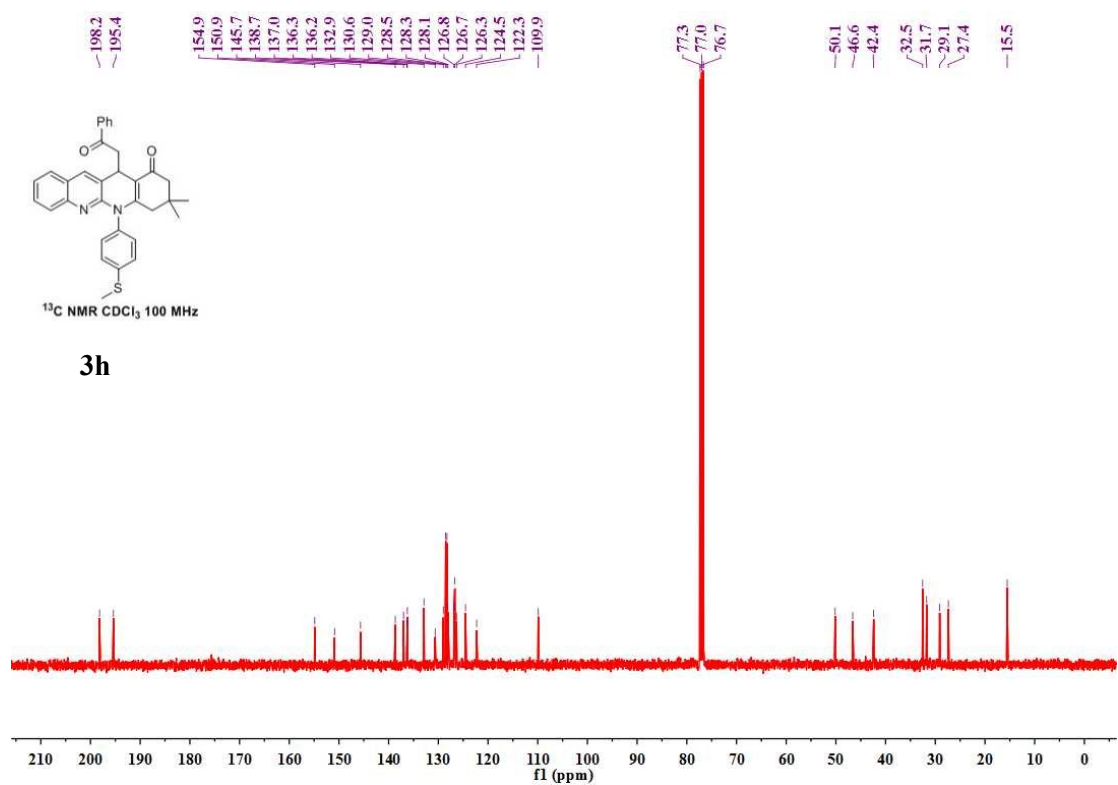

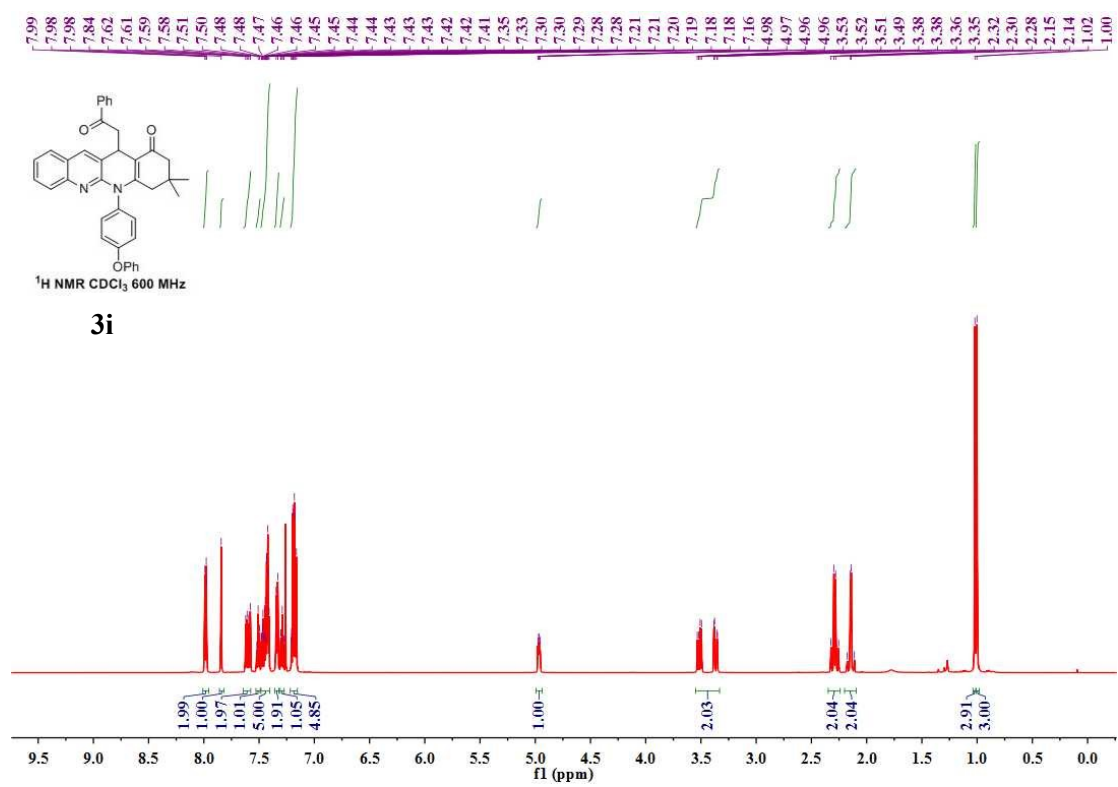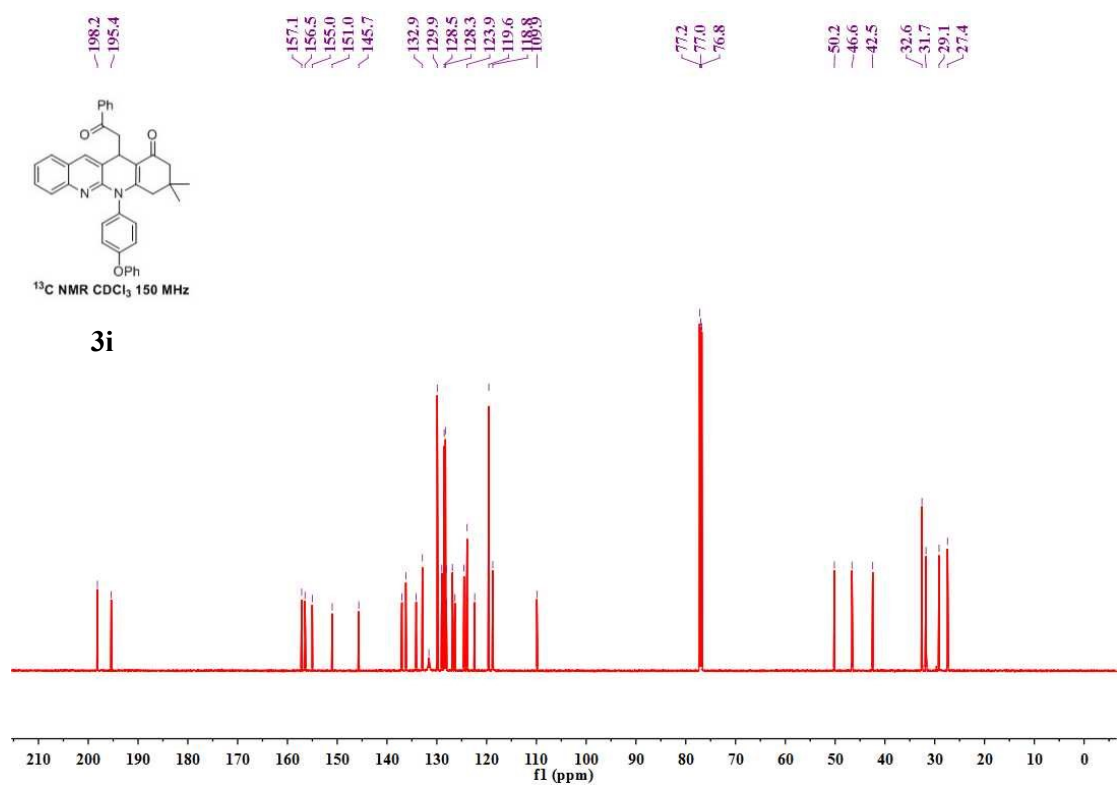

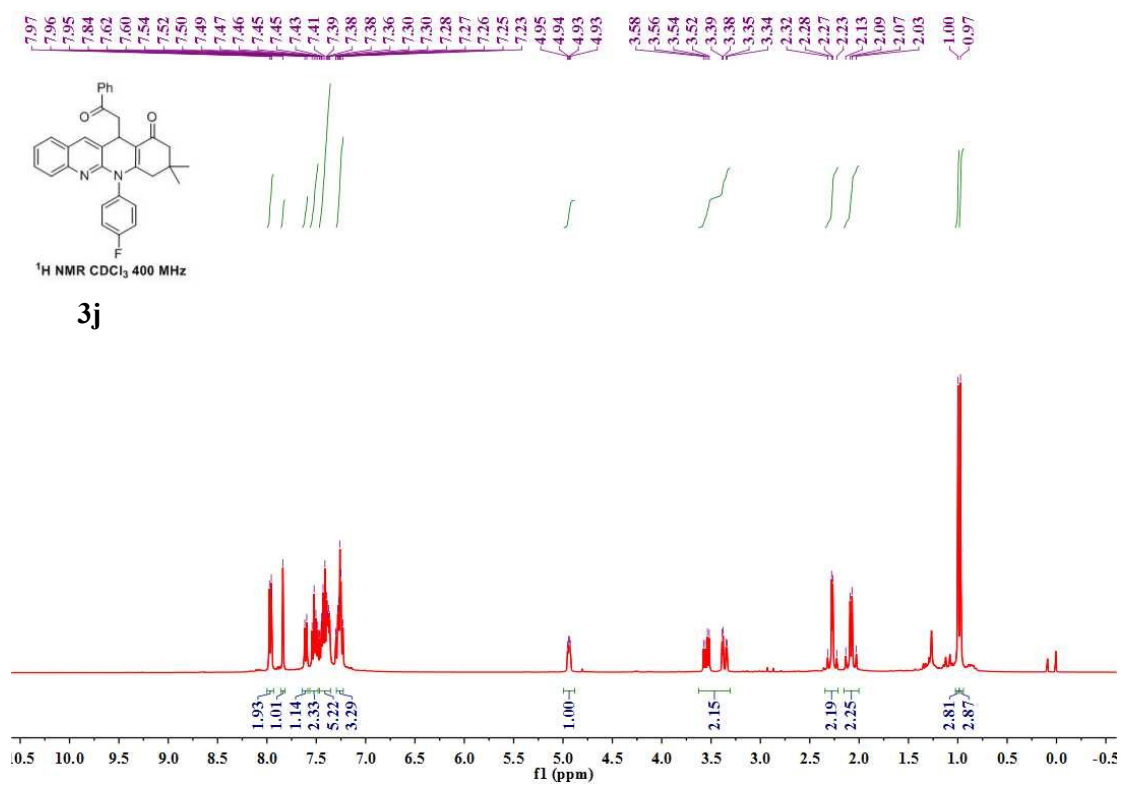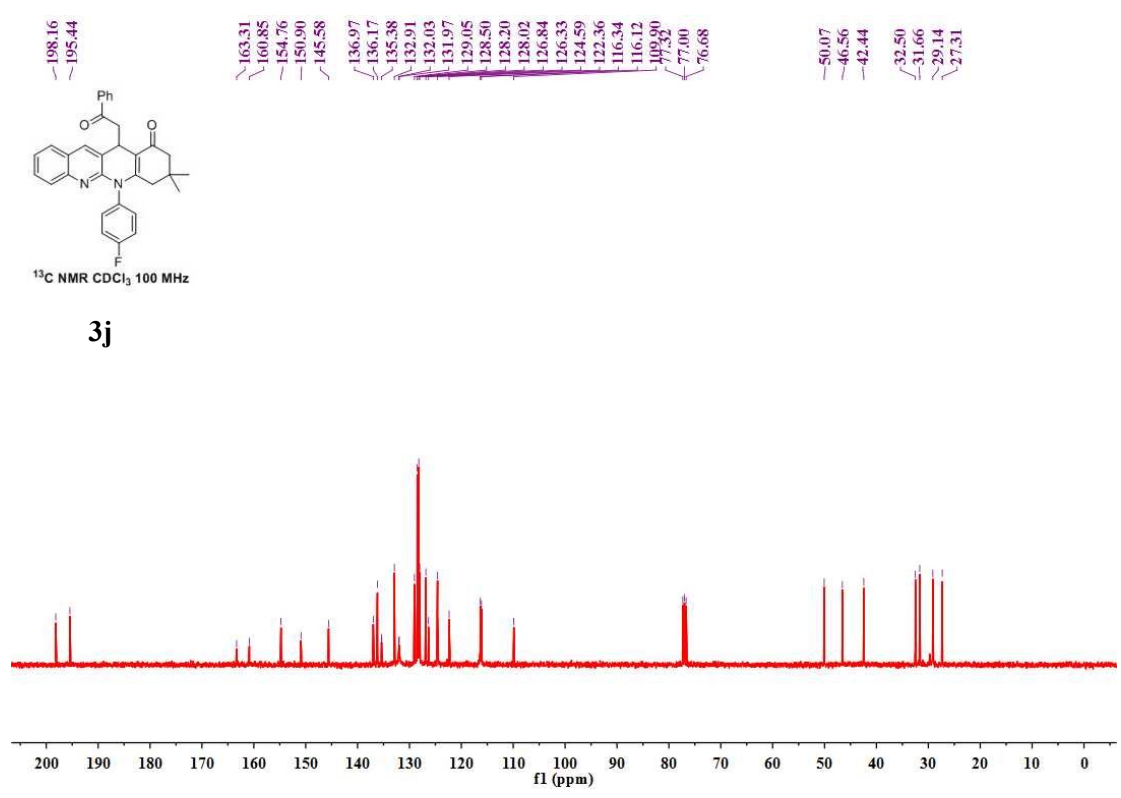

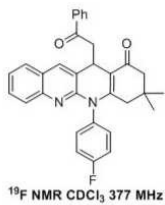

**3j**

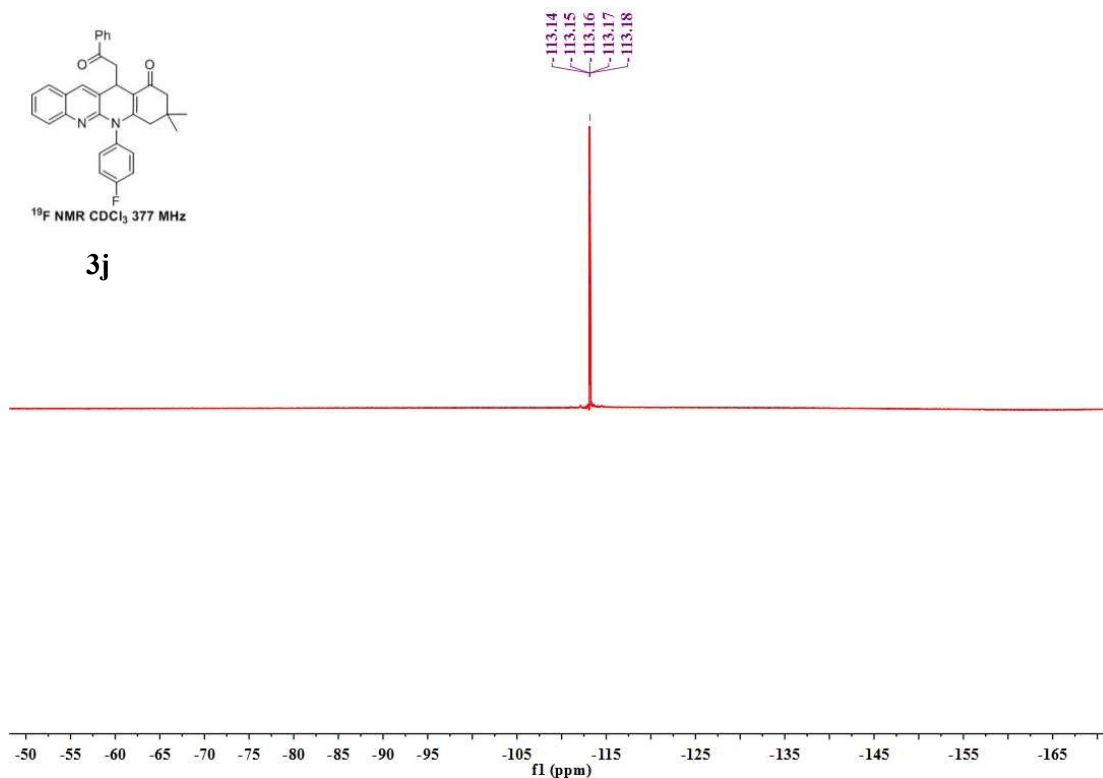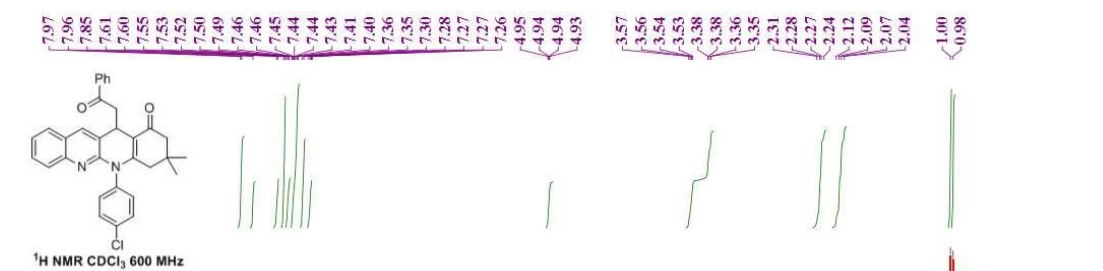

**3k**

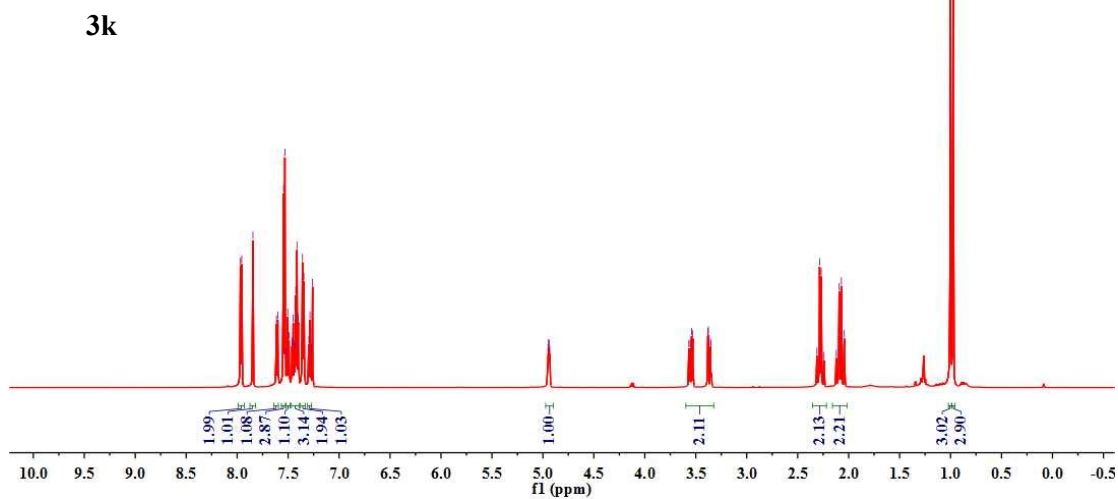

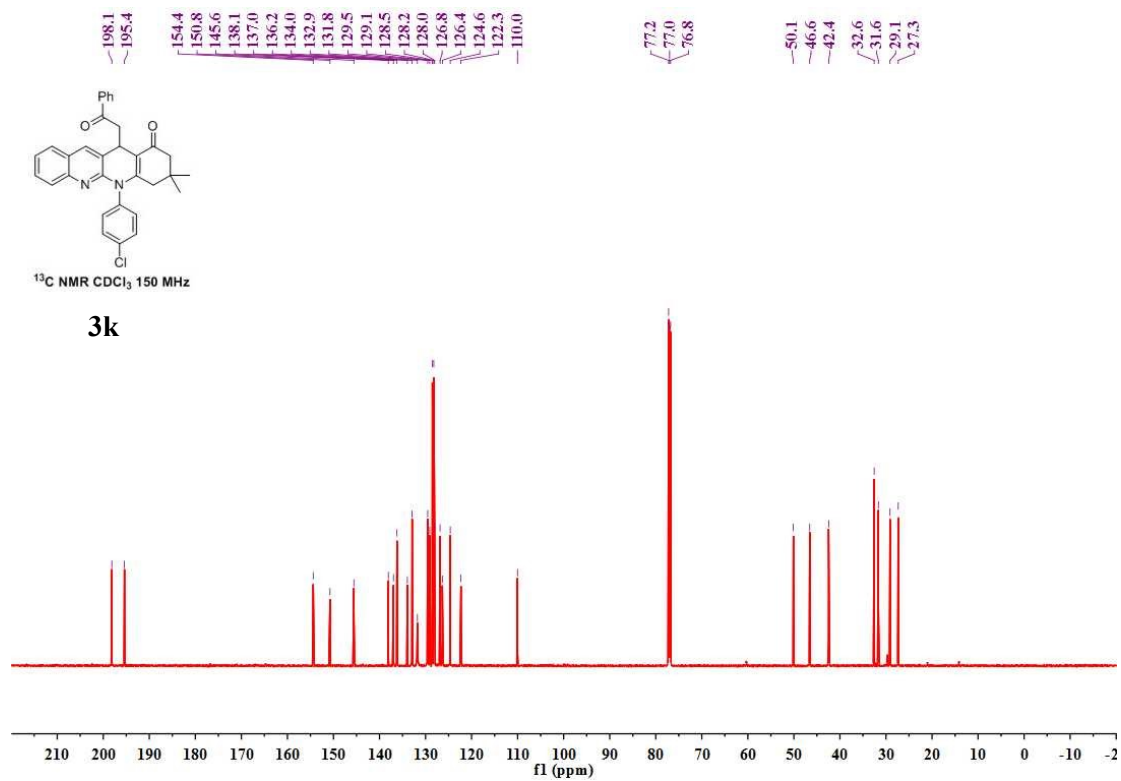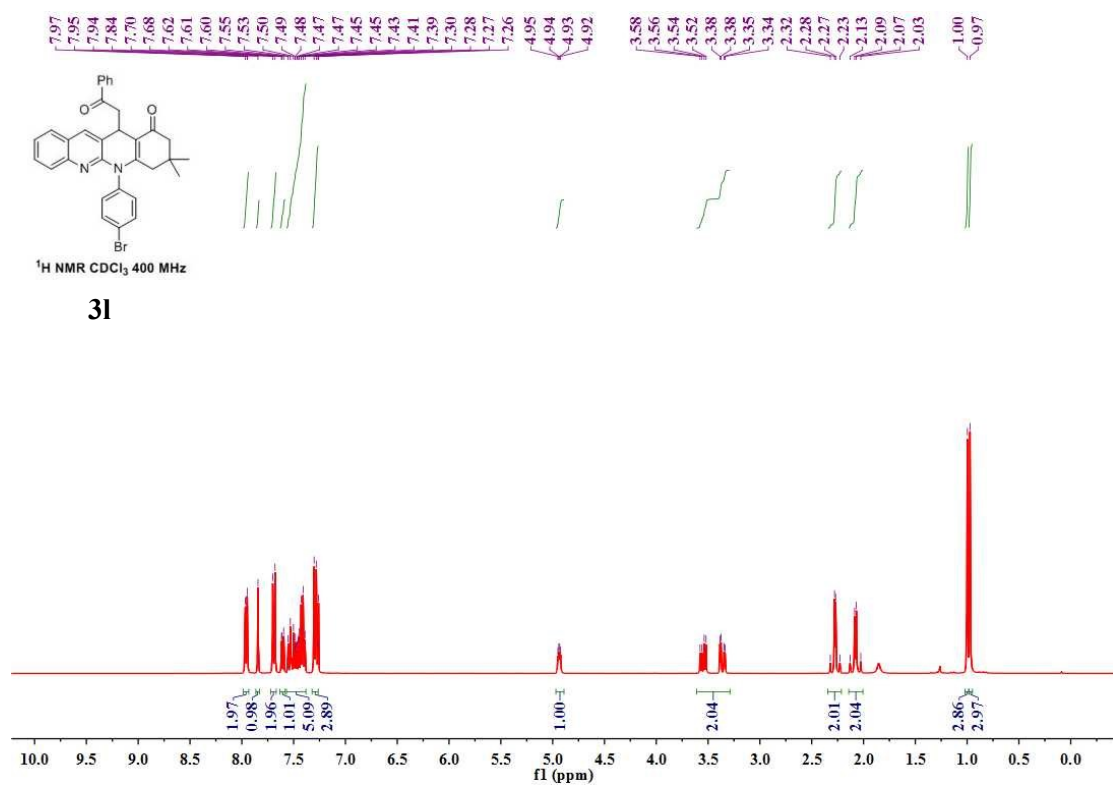

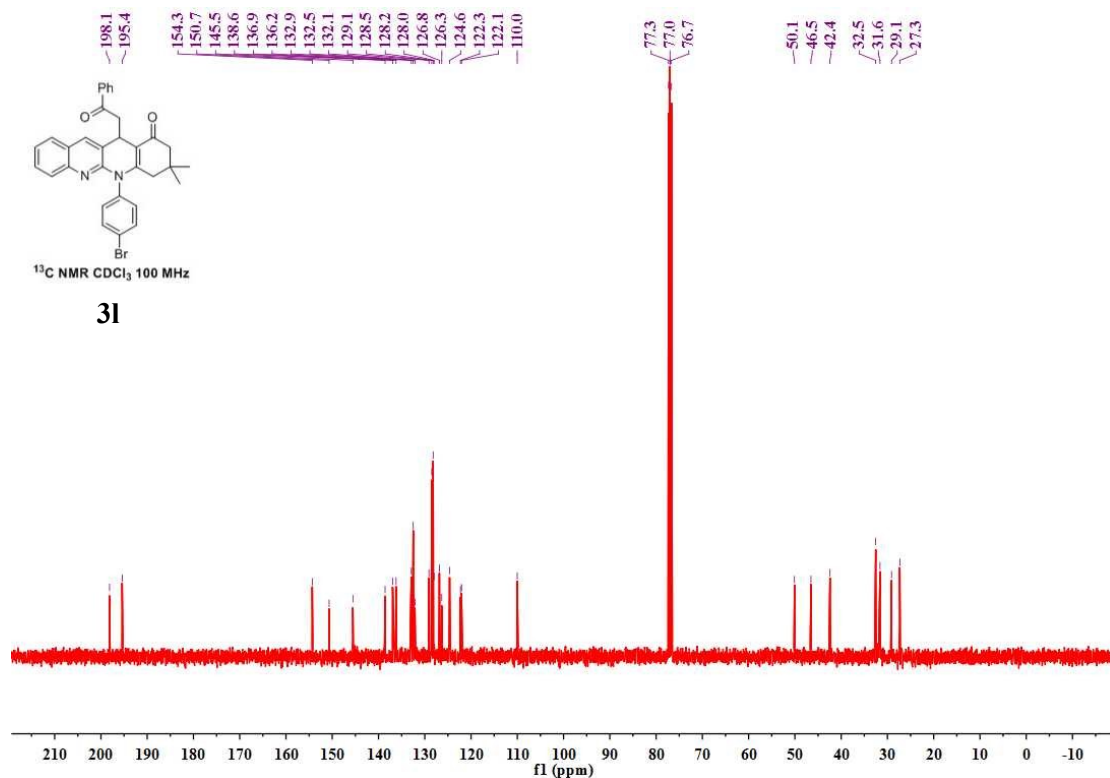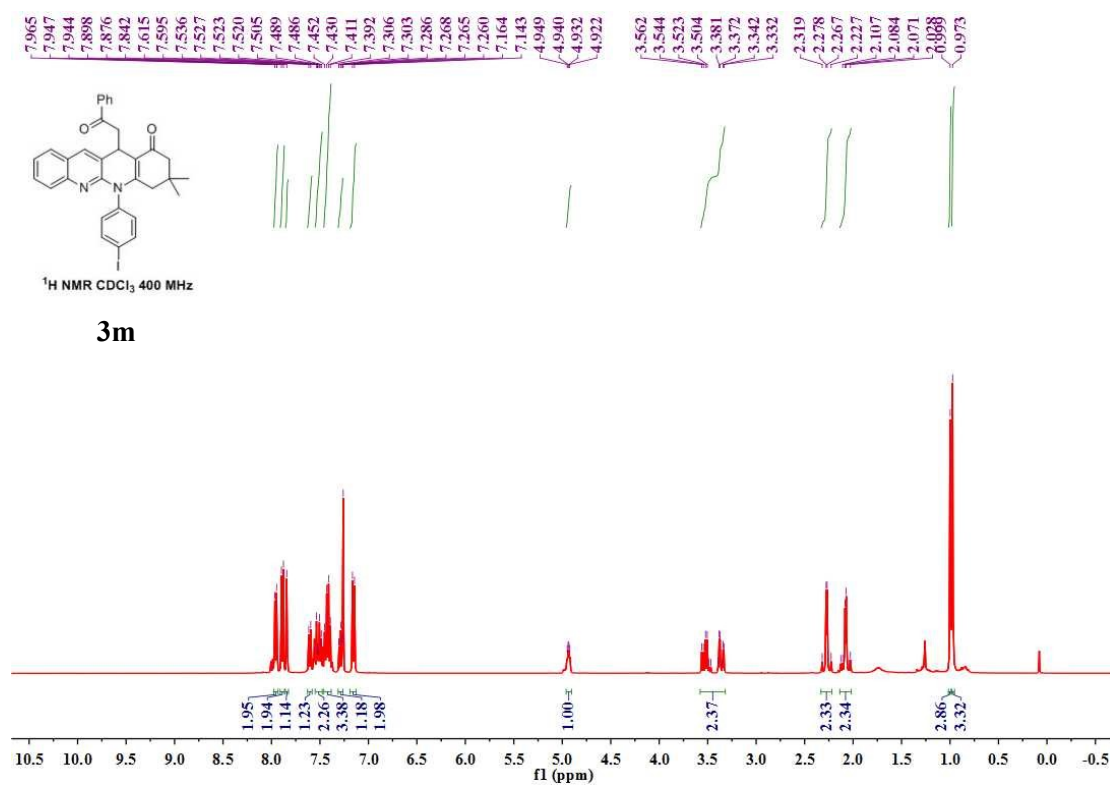

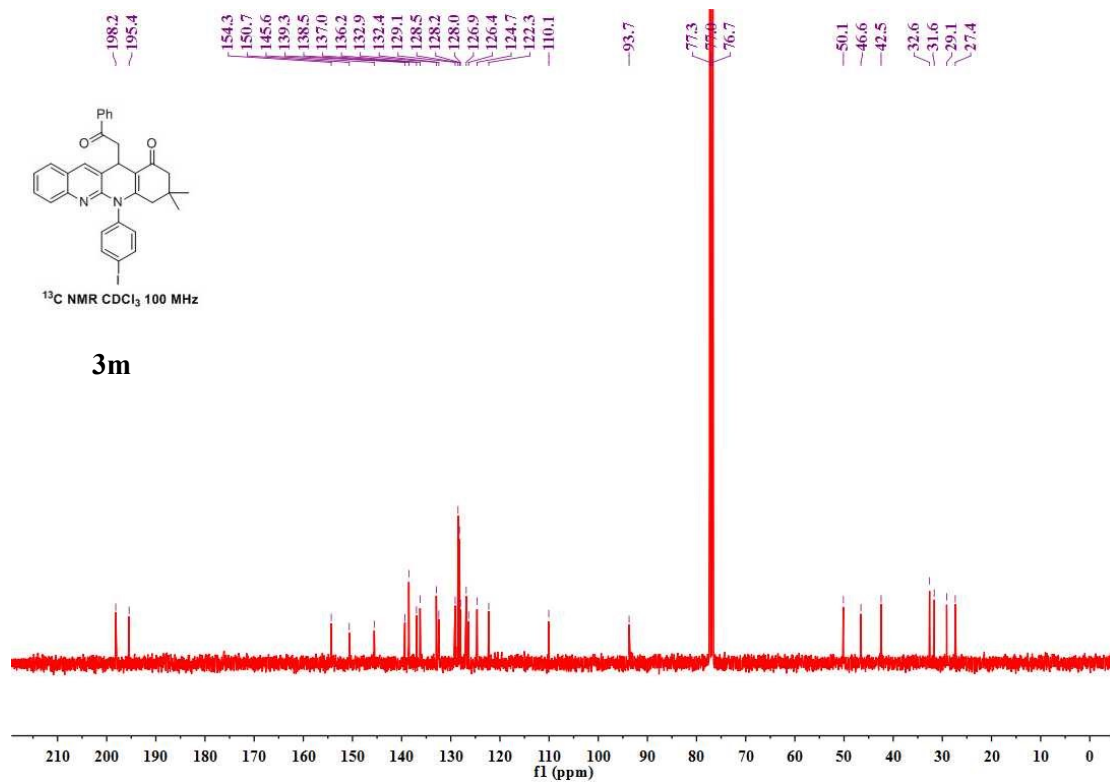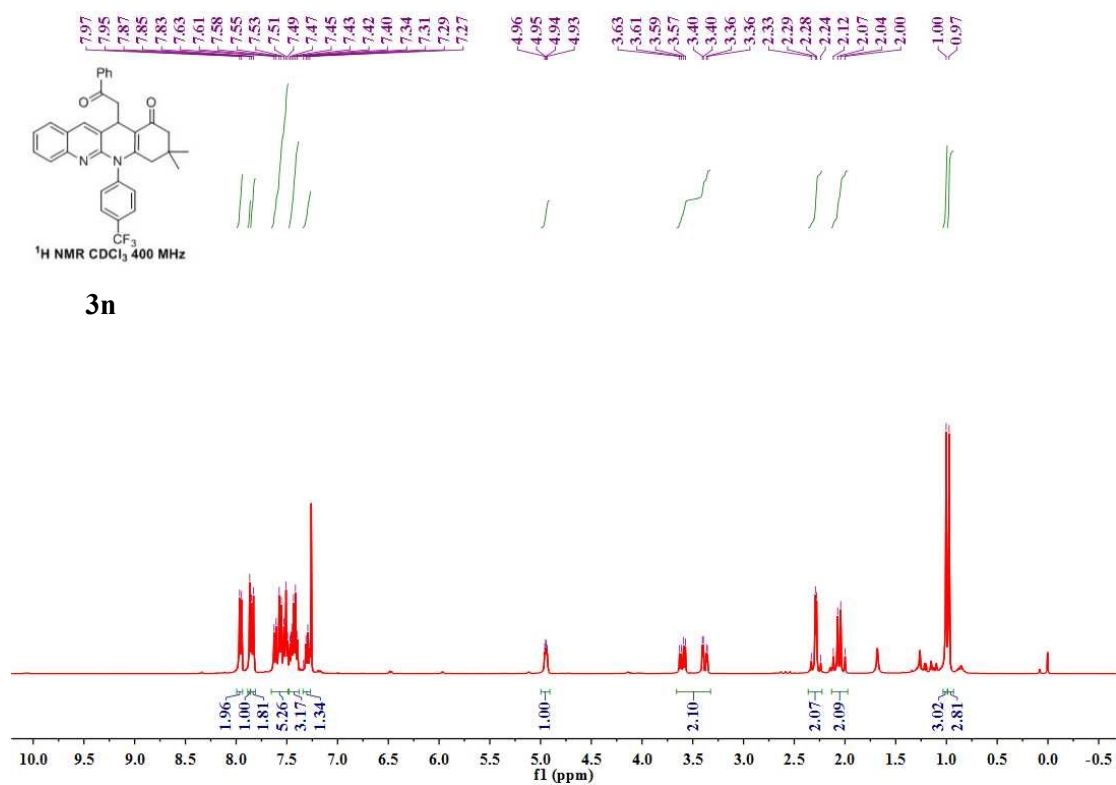



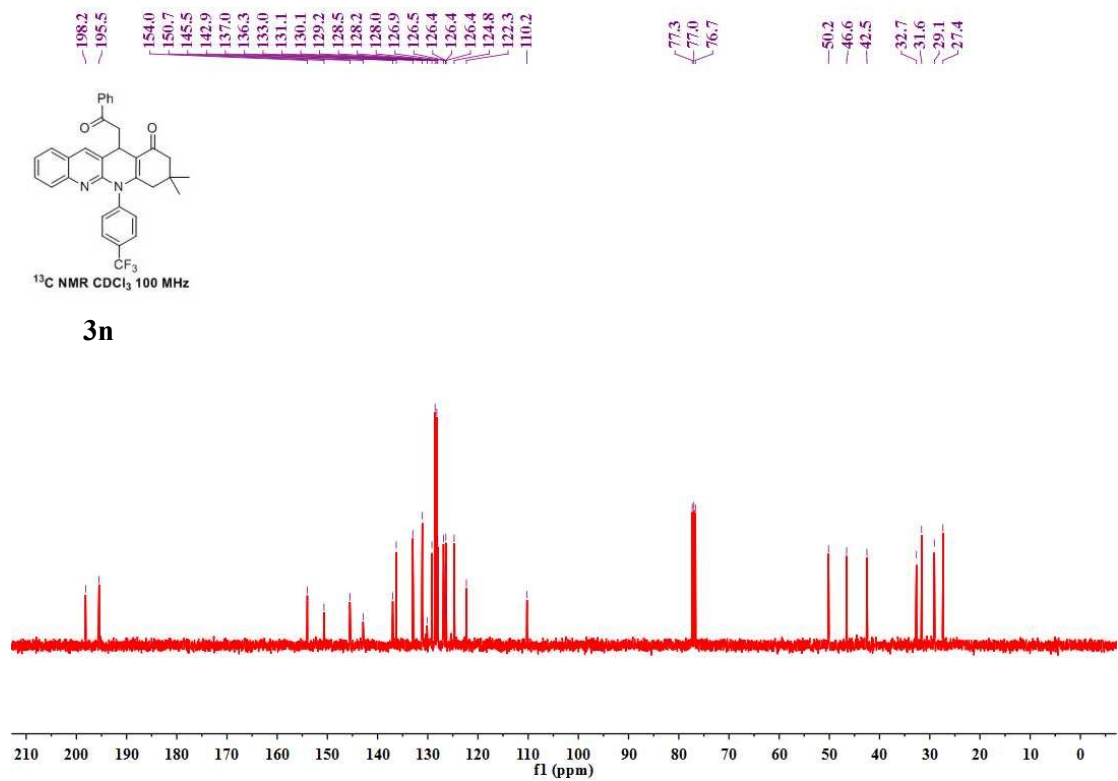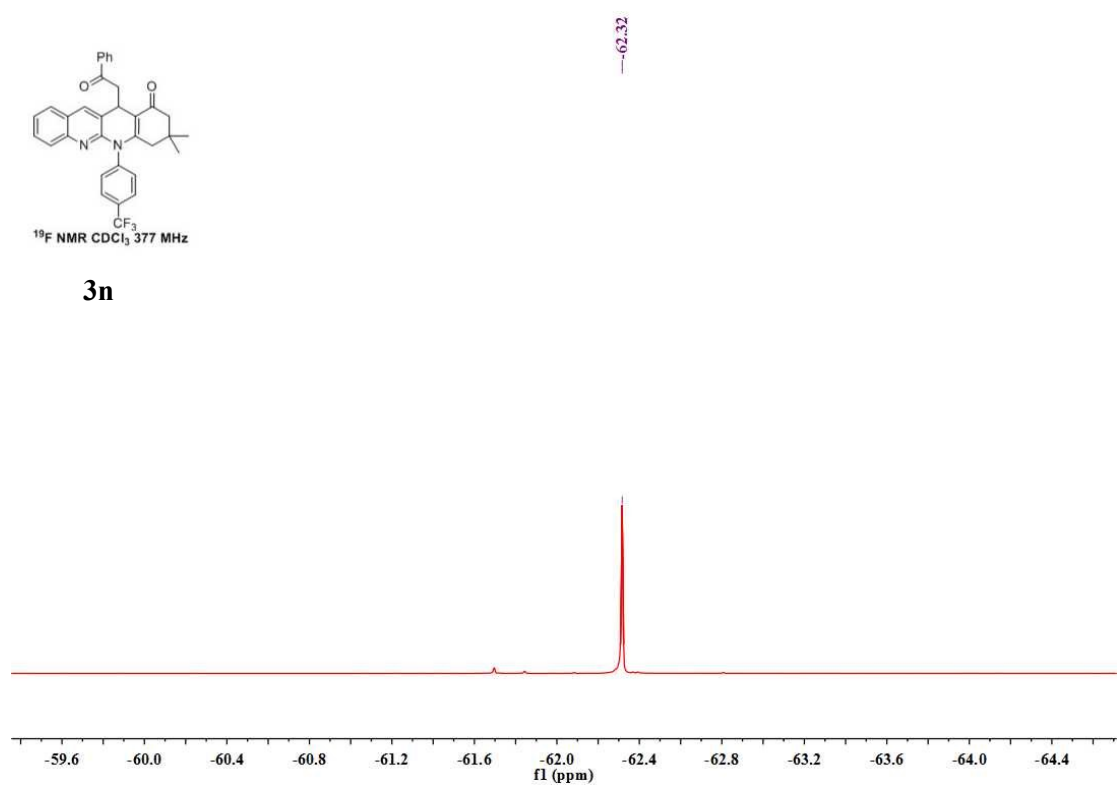

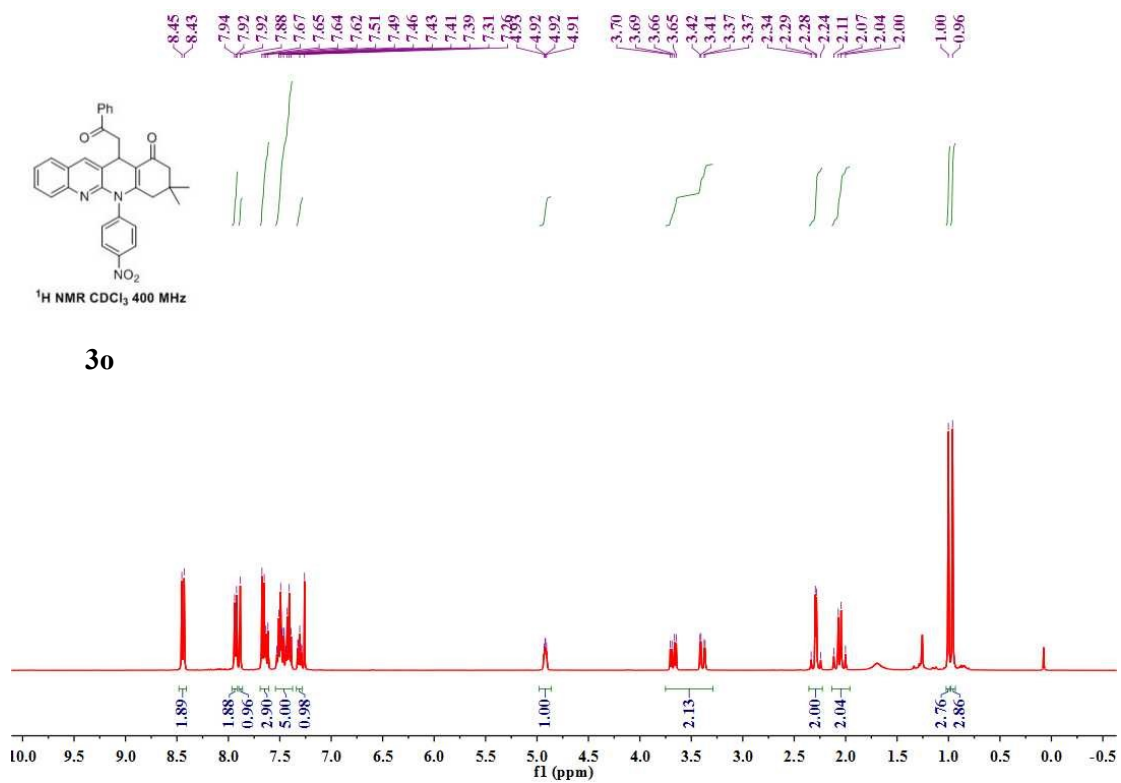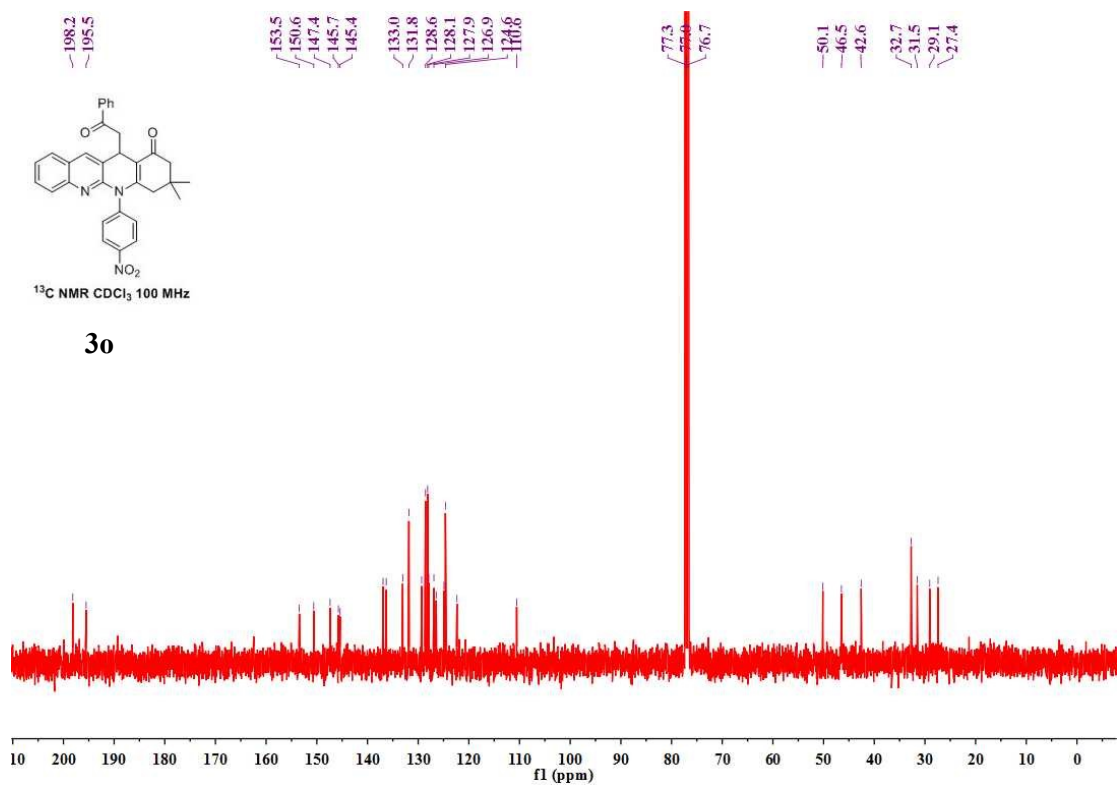

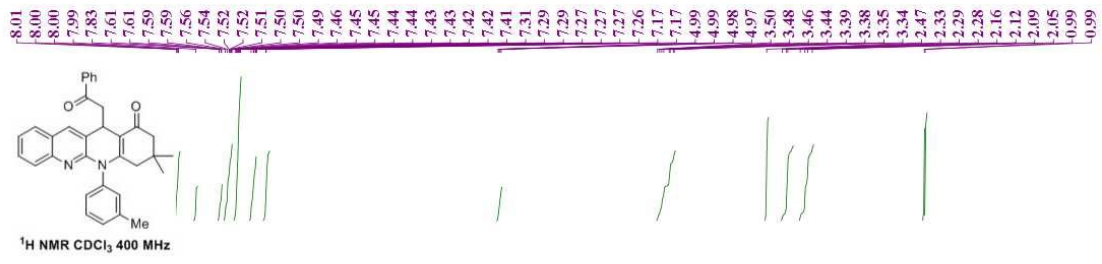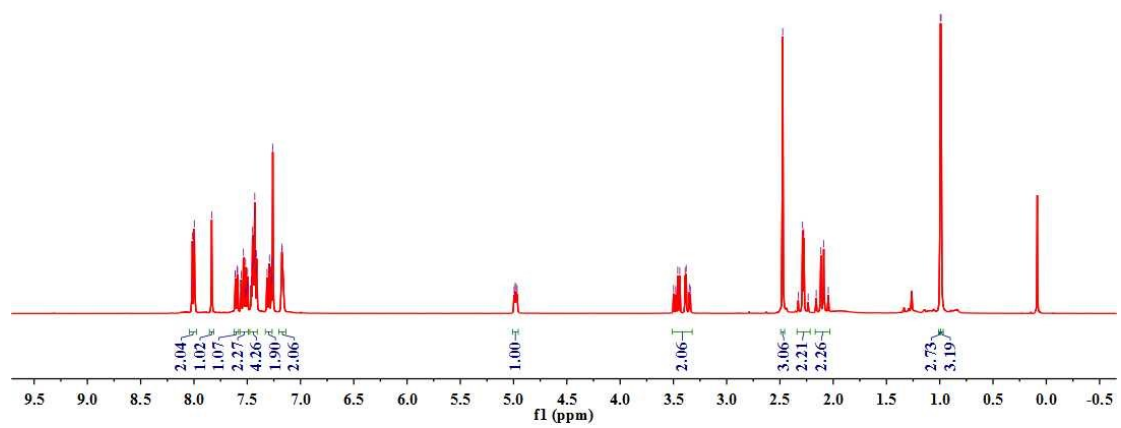

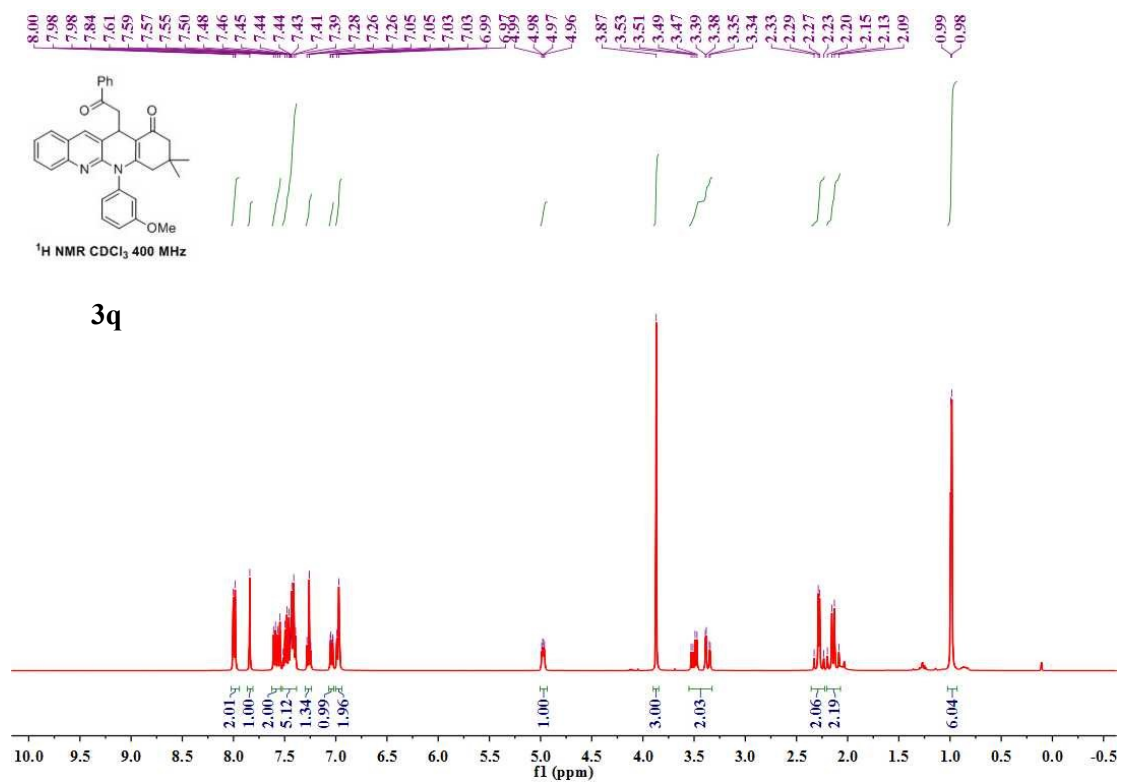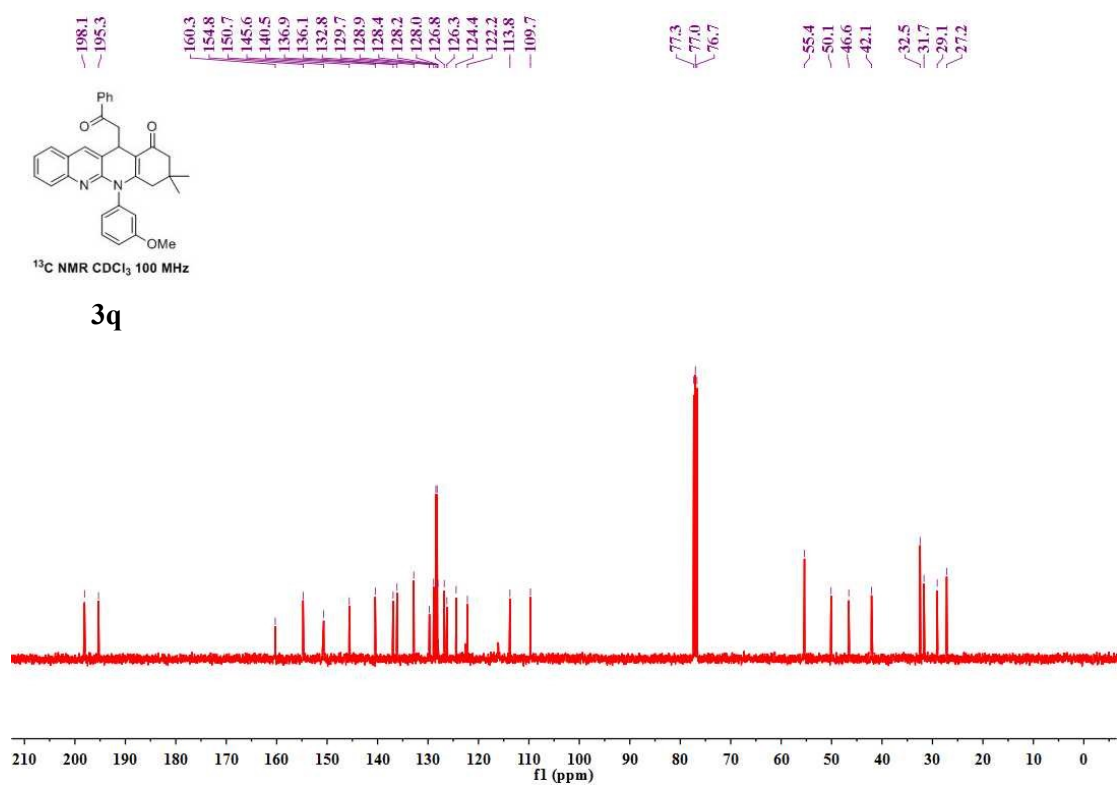

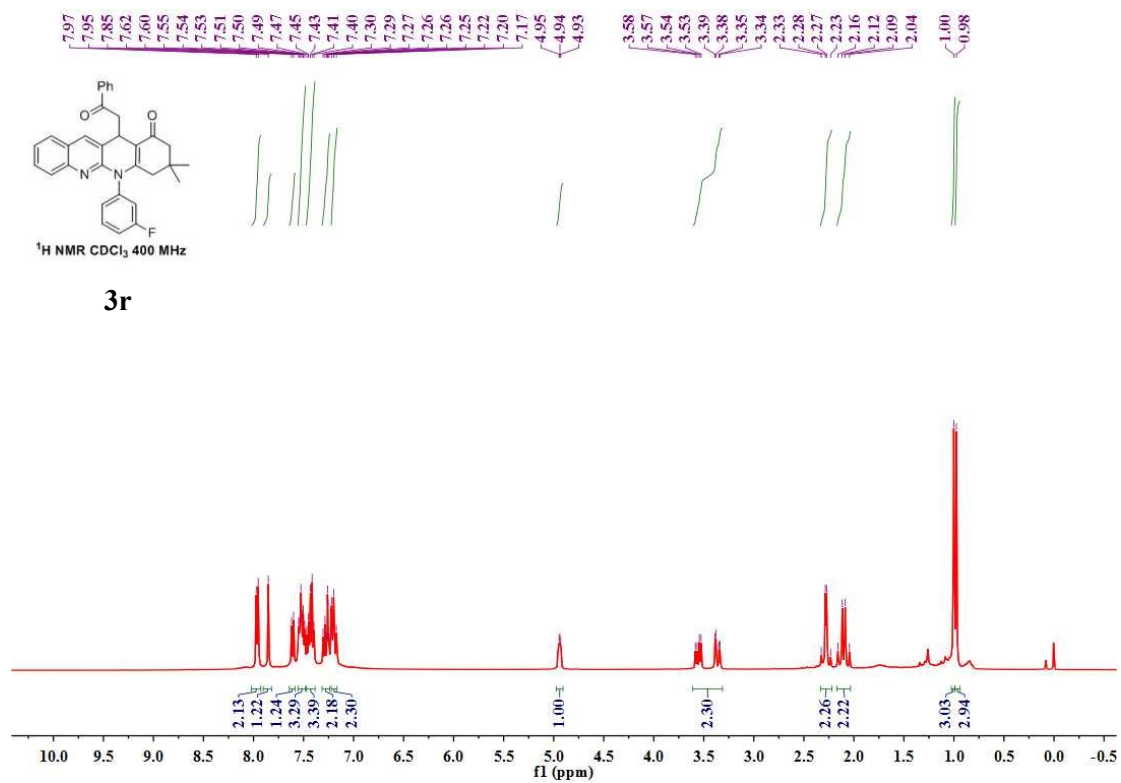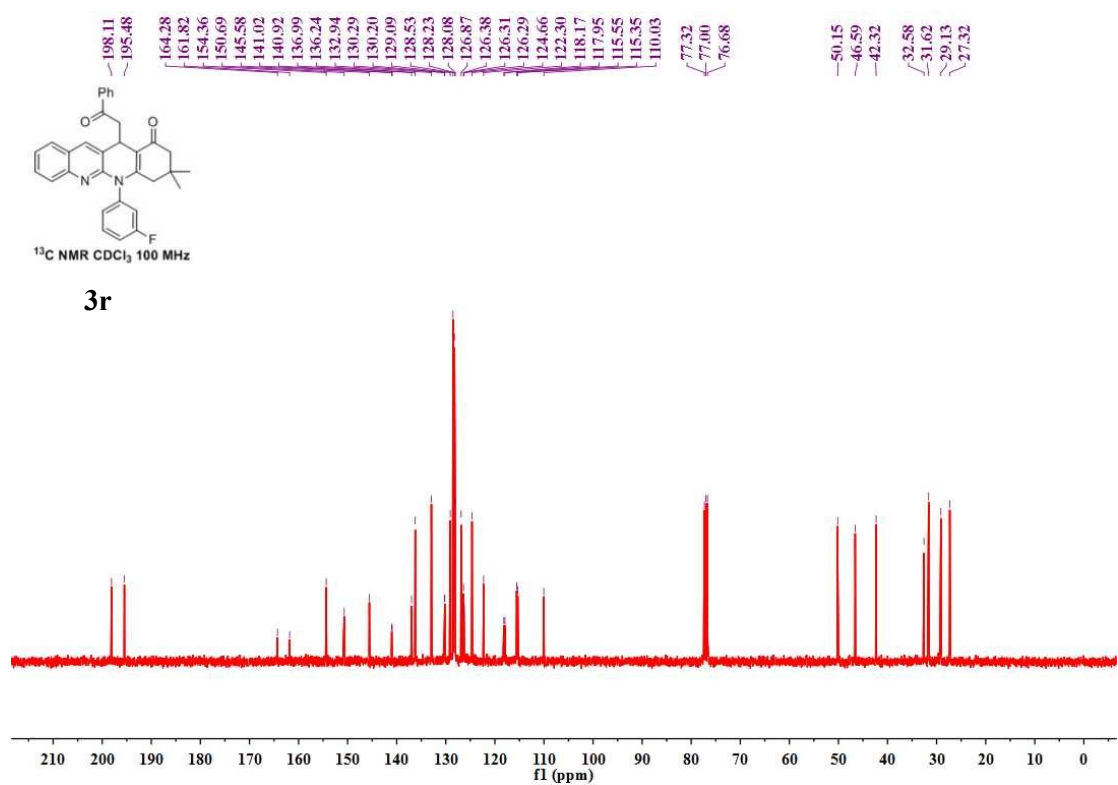

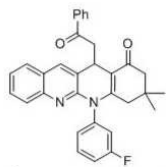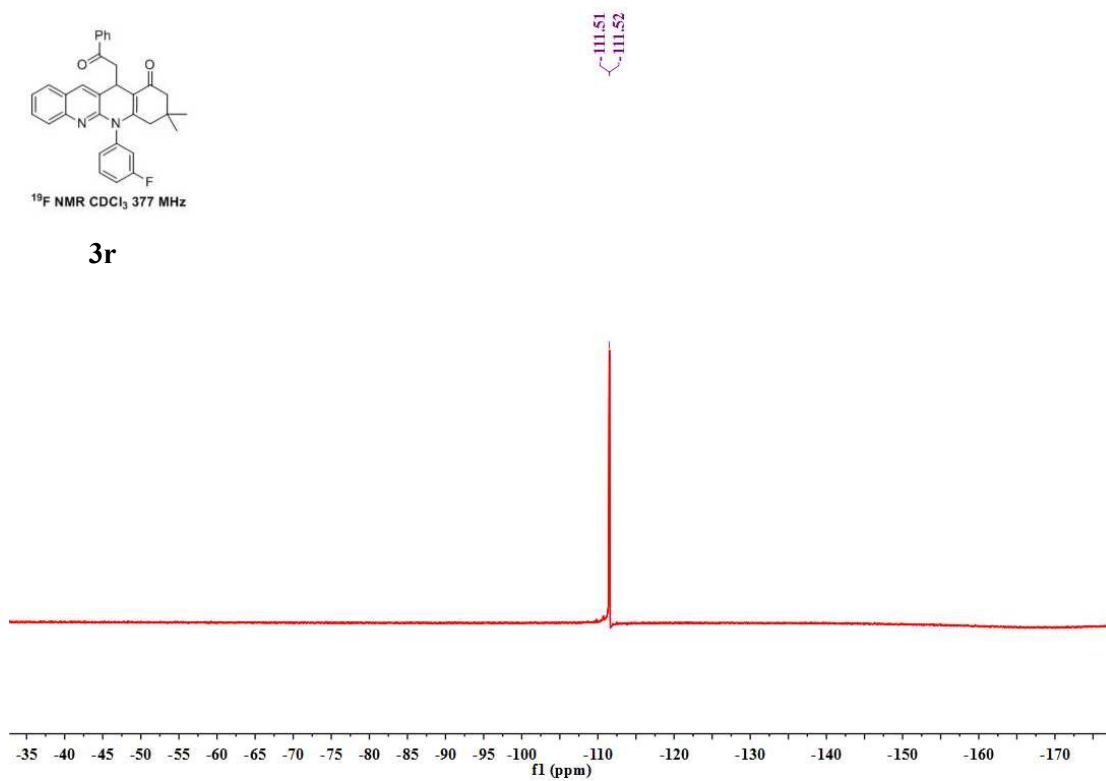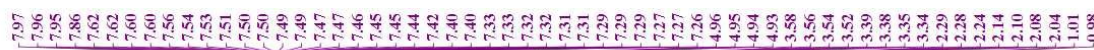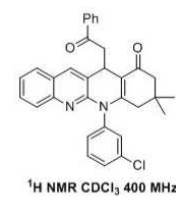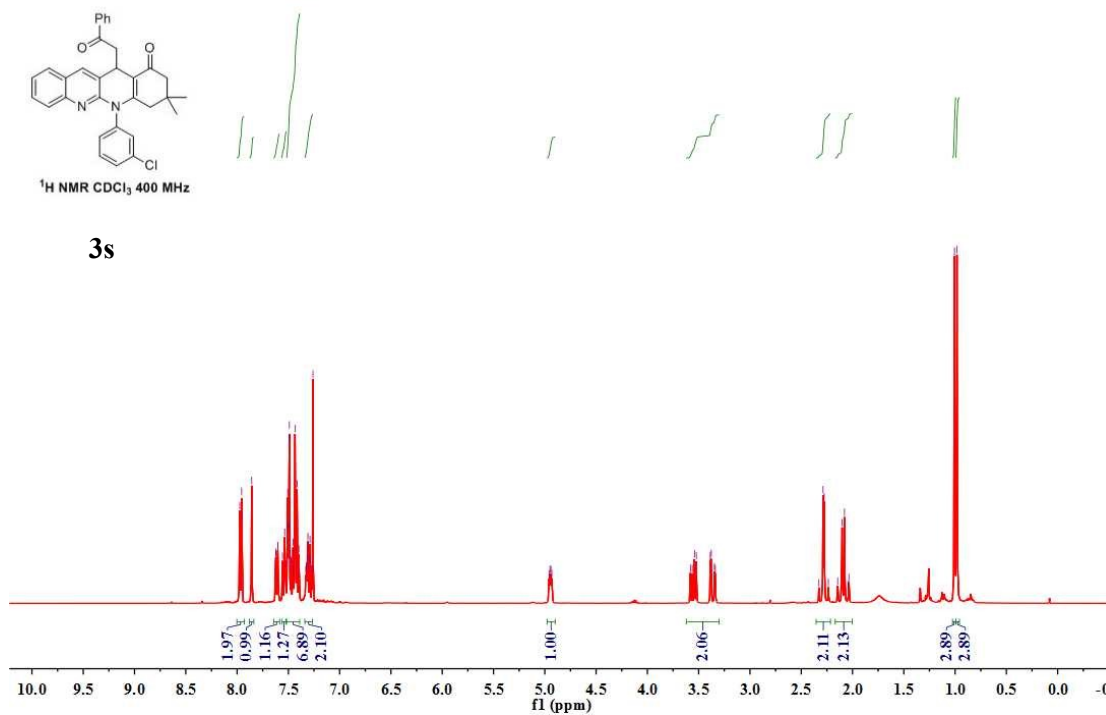

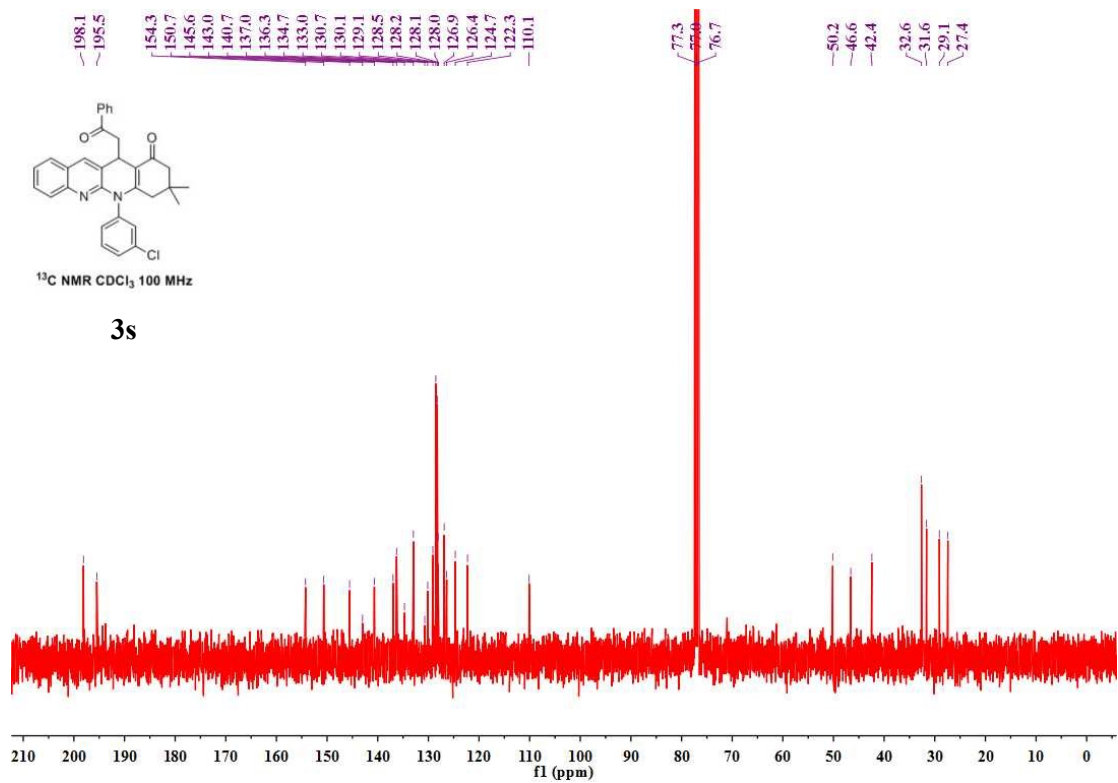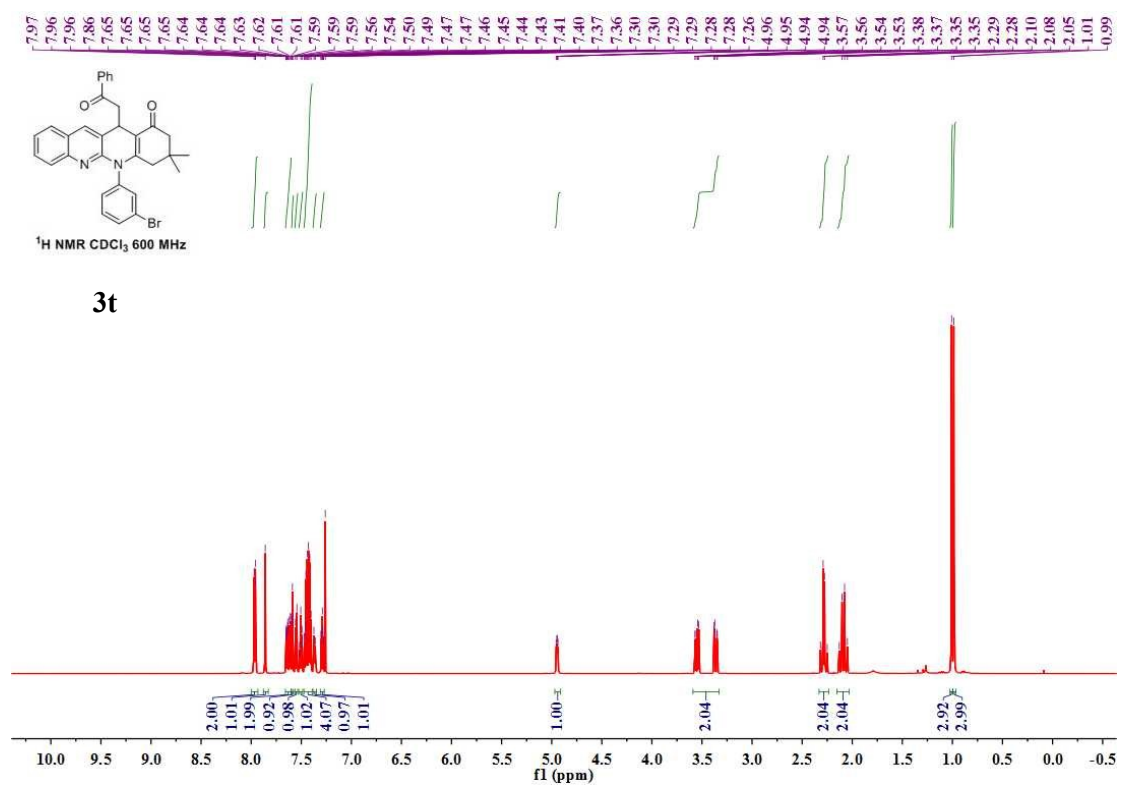

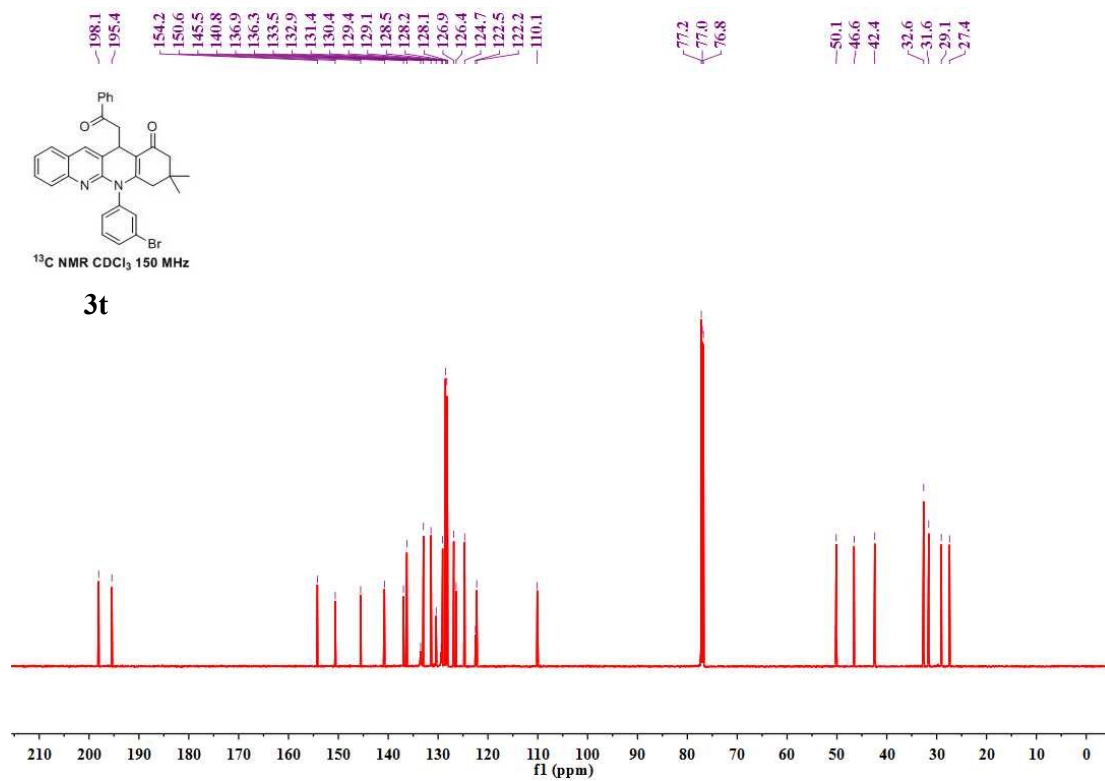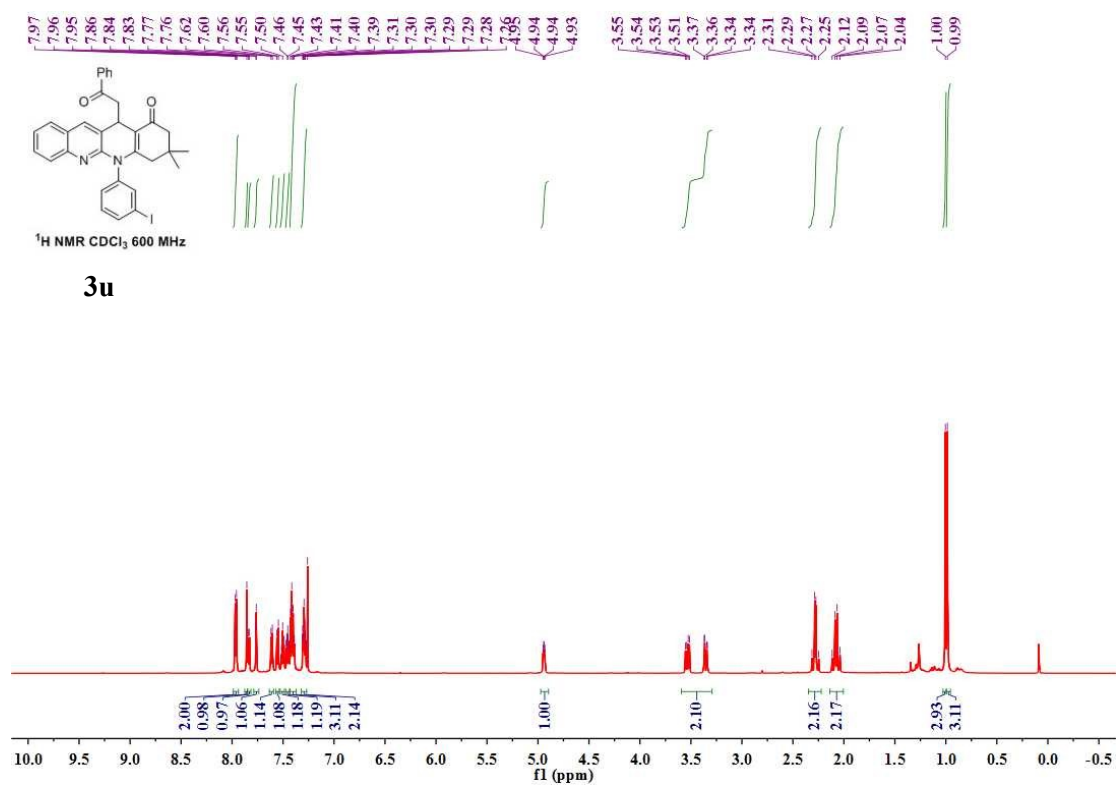



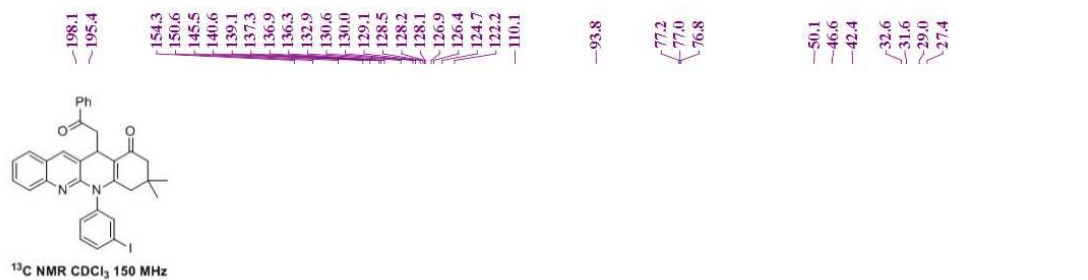

**3u**

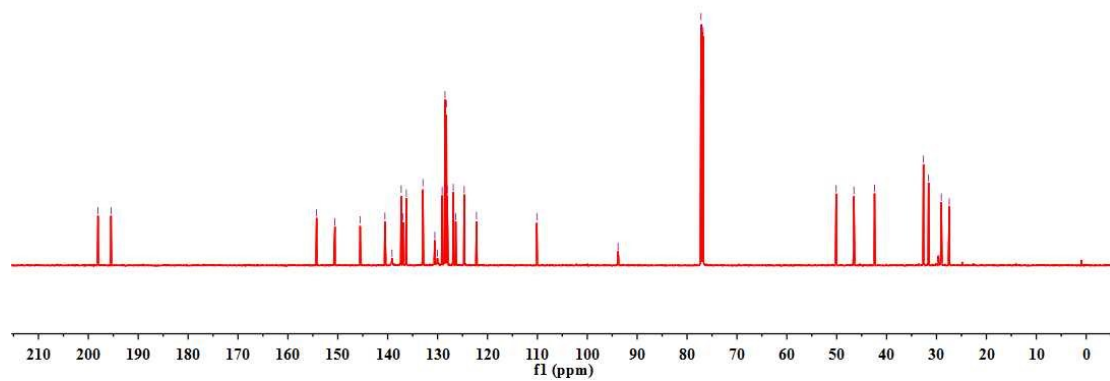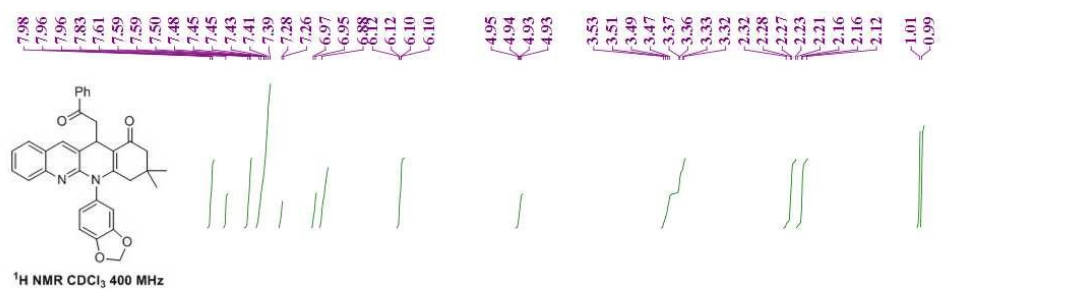

**3v**

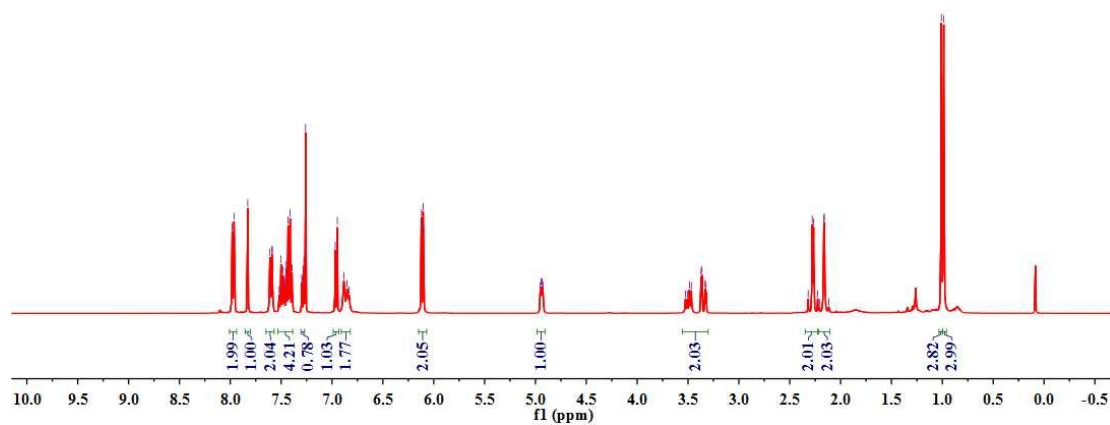

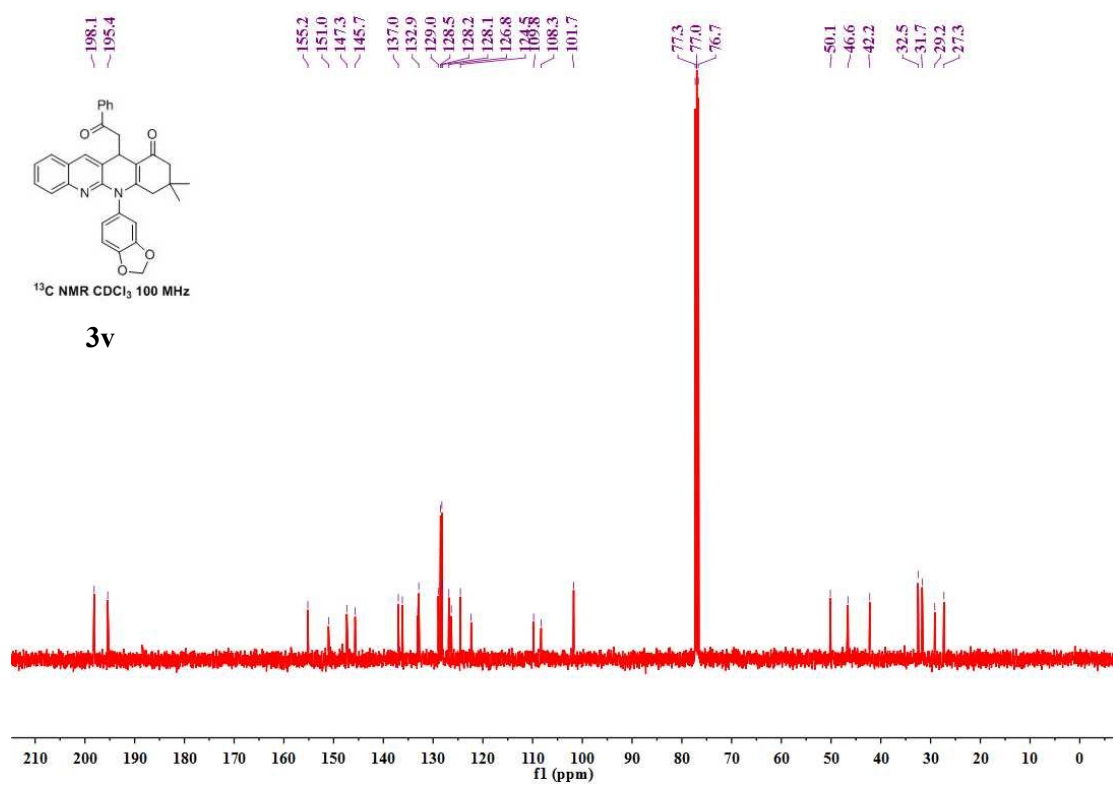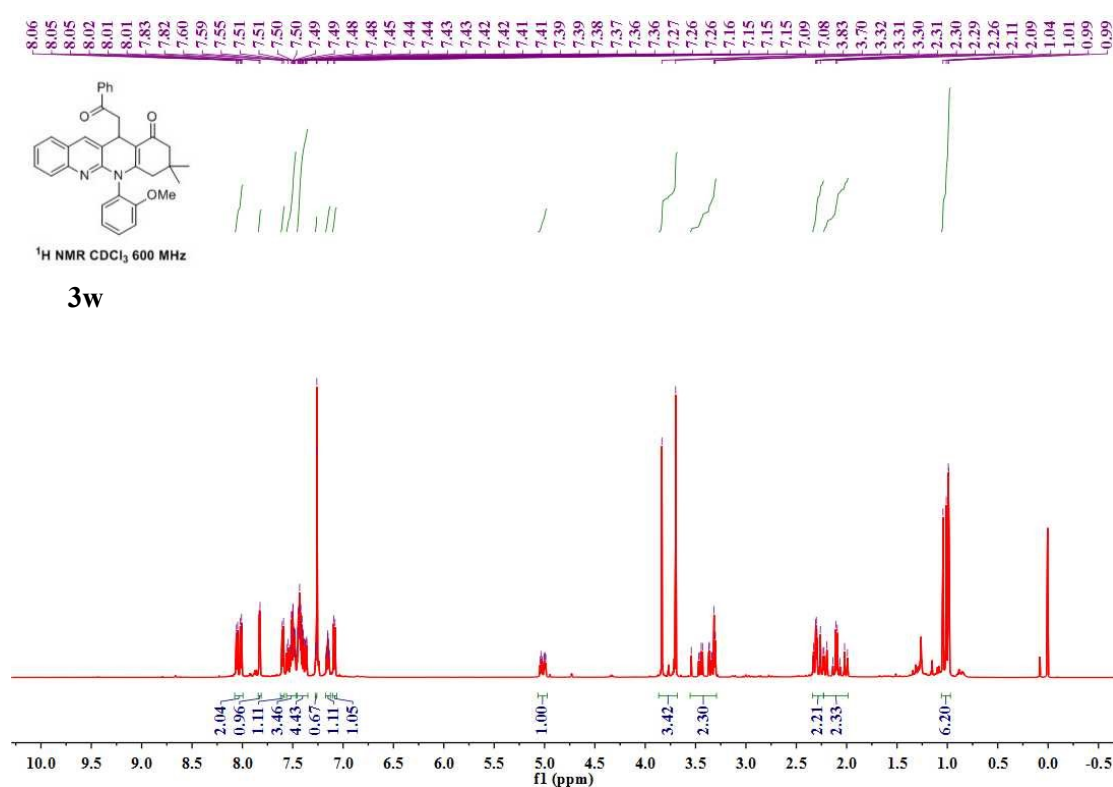

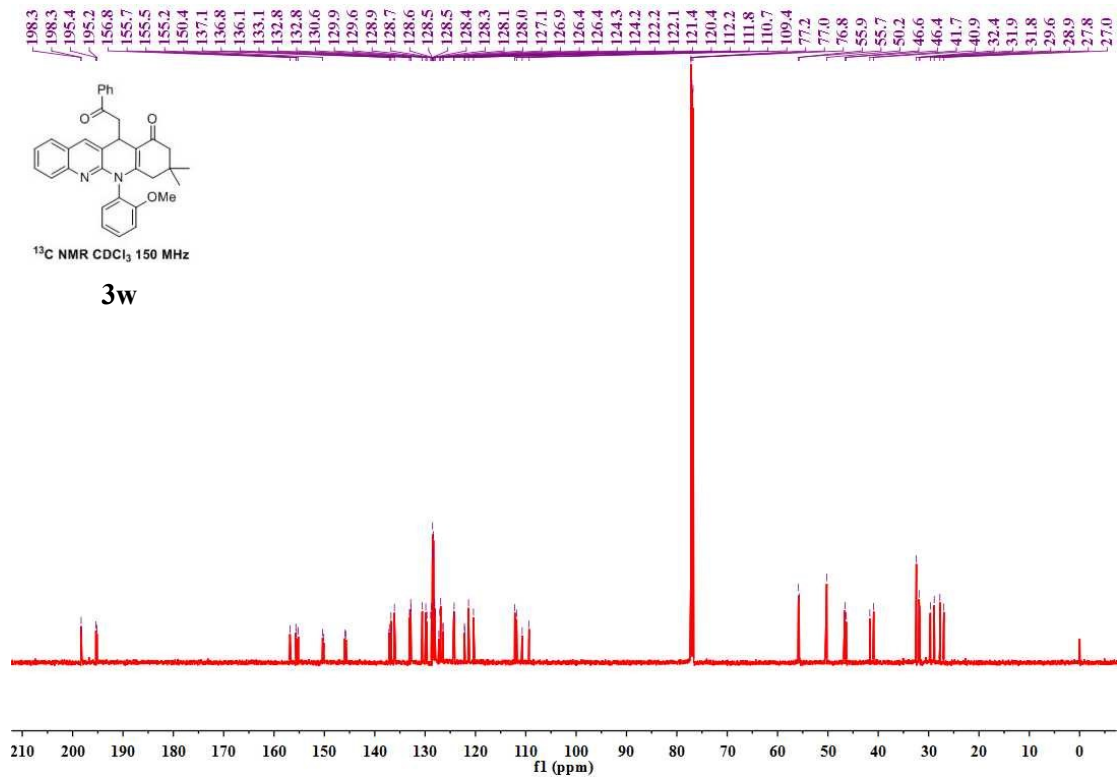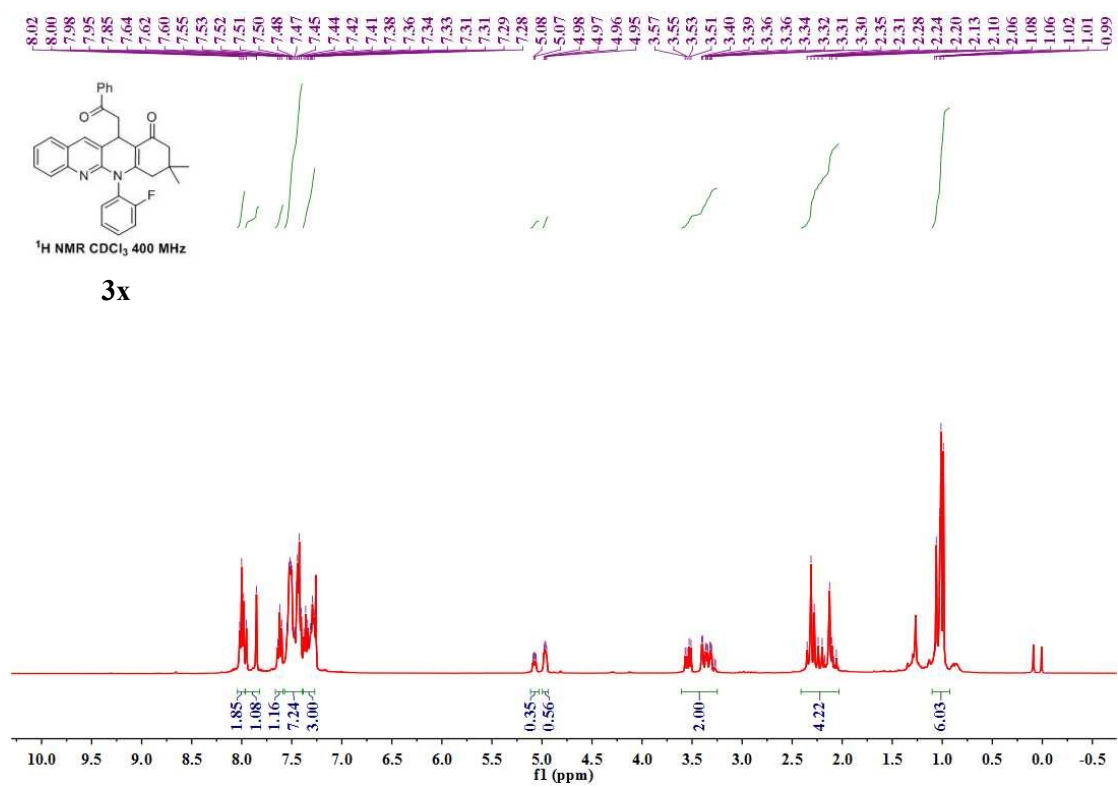

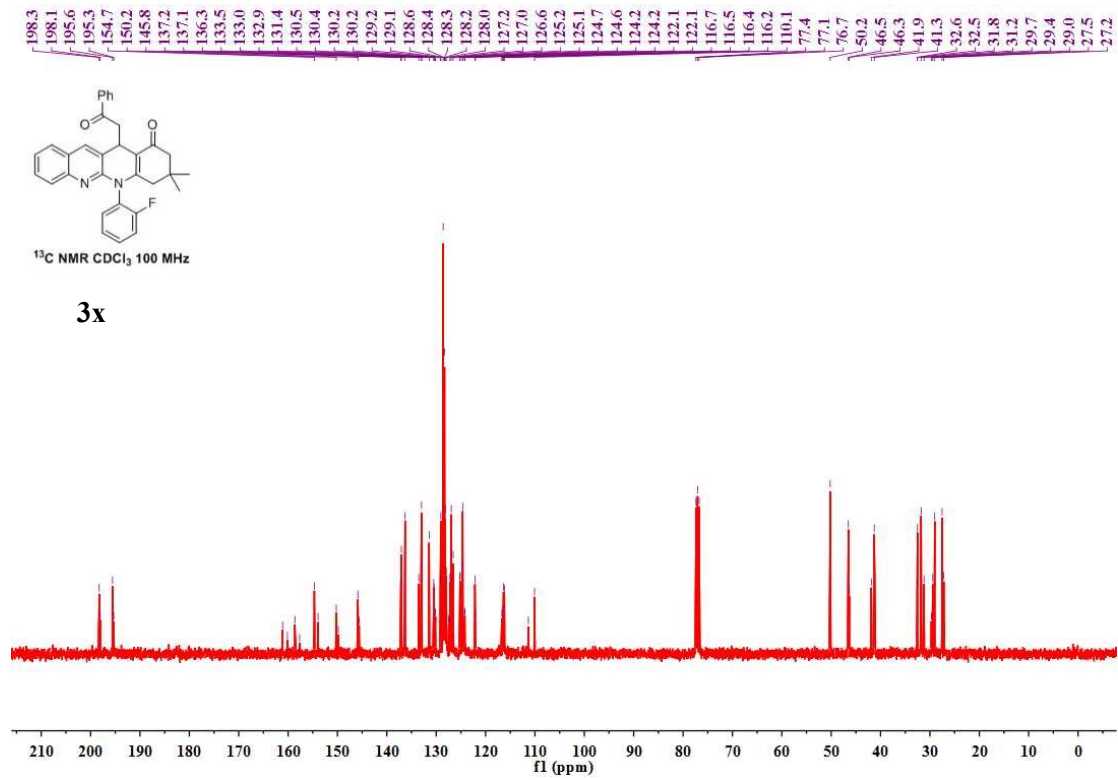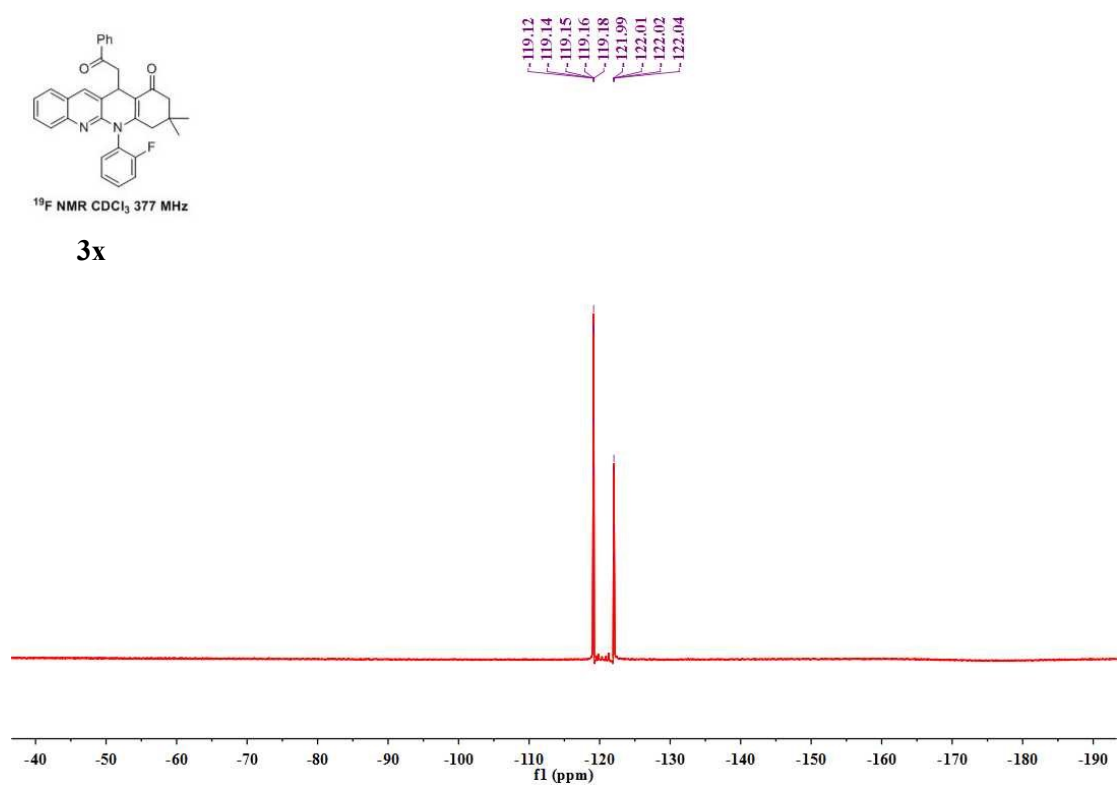

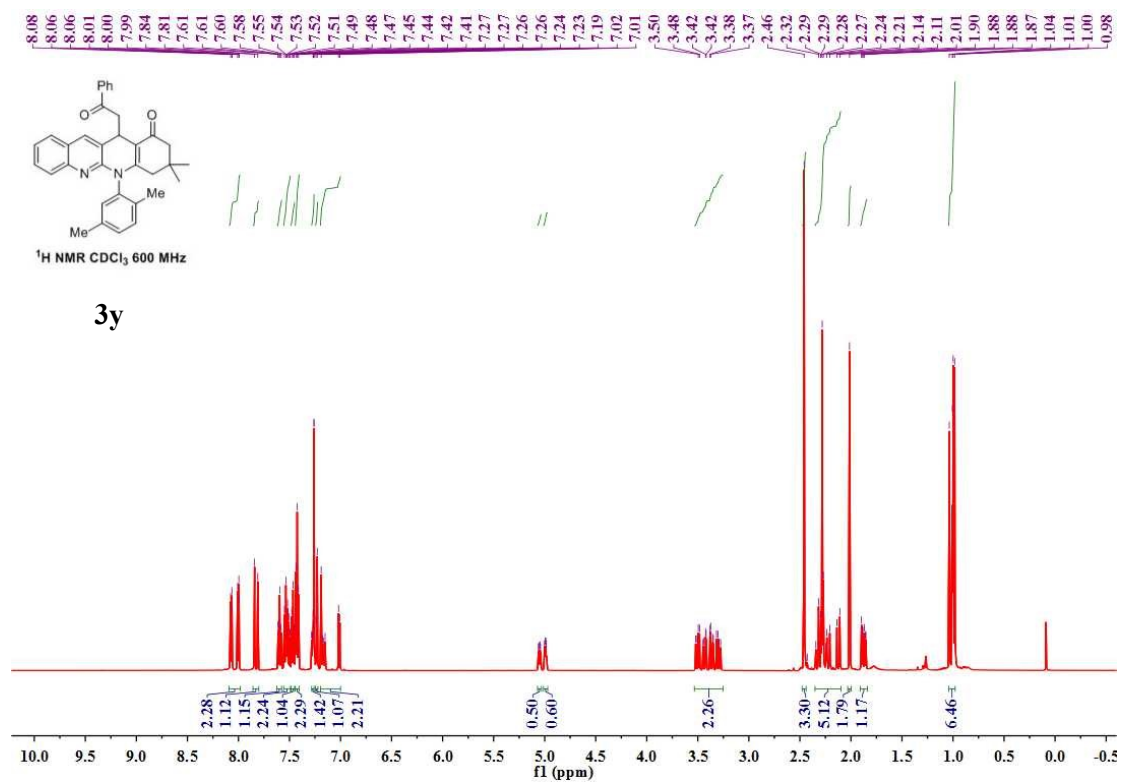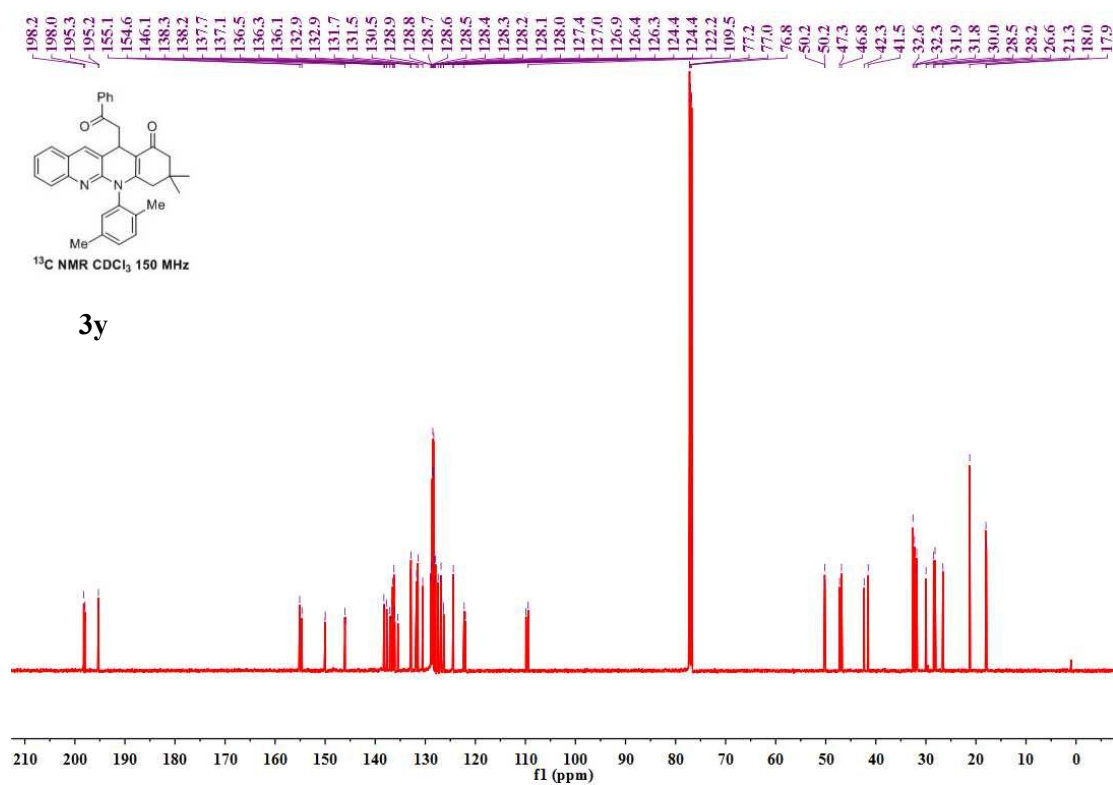

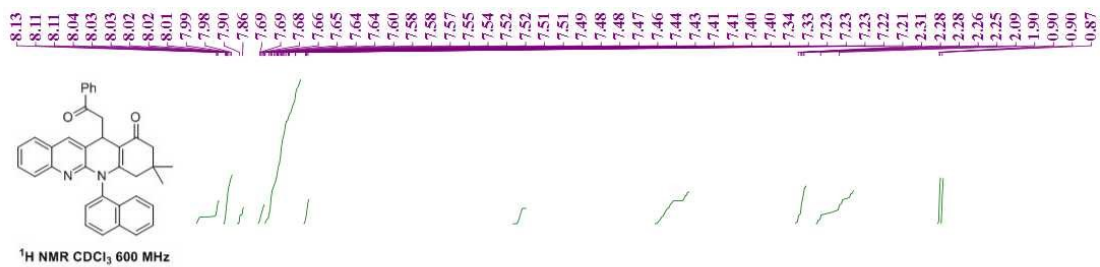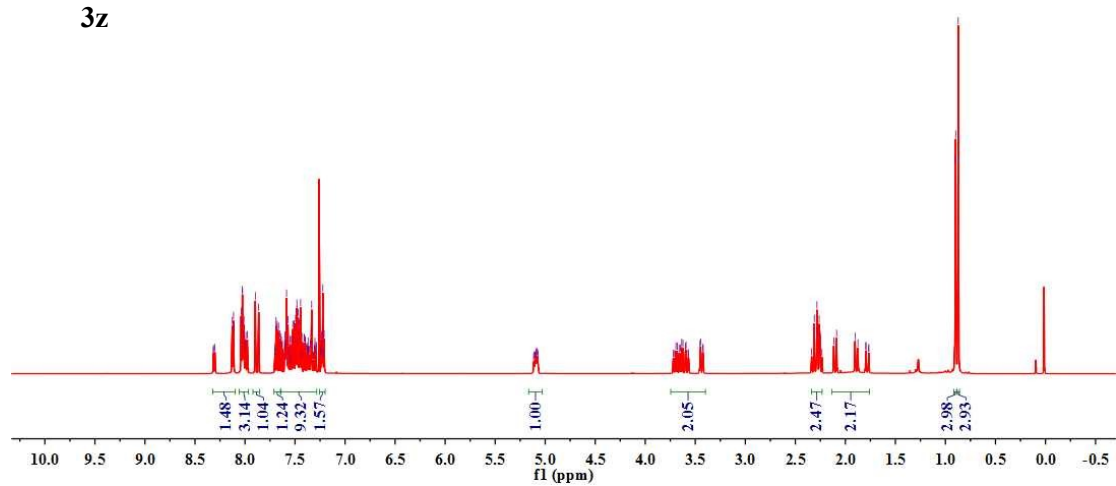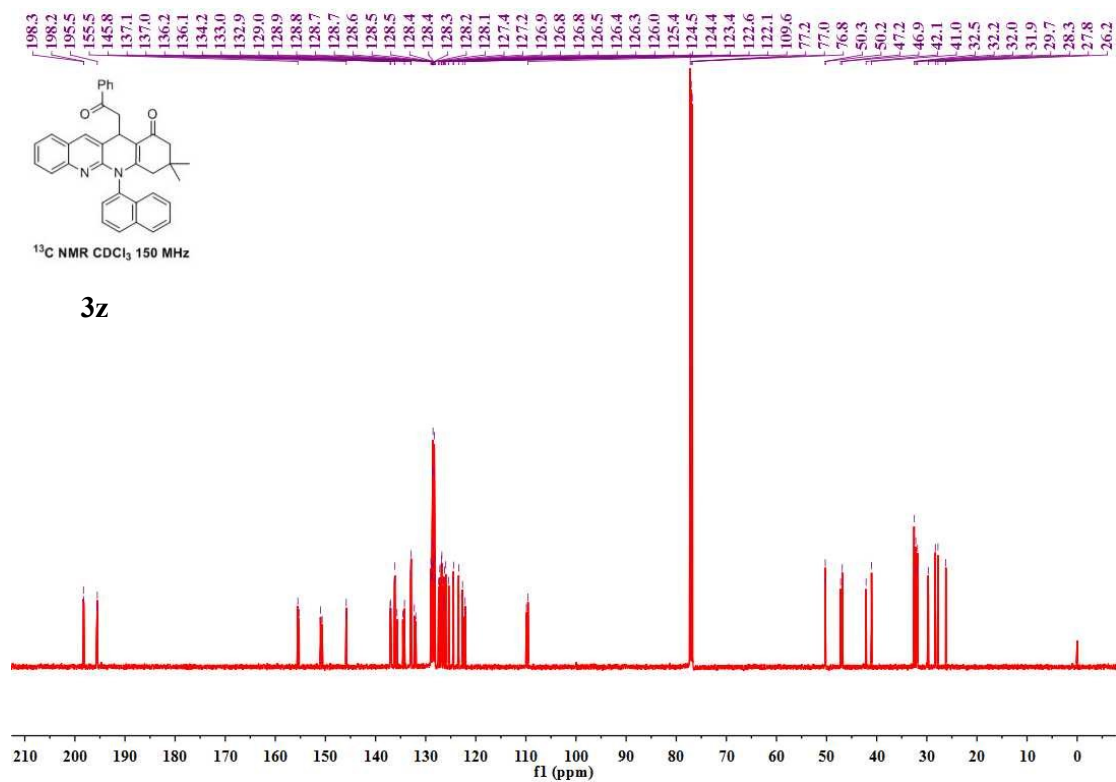

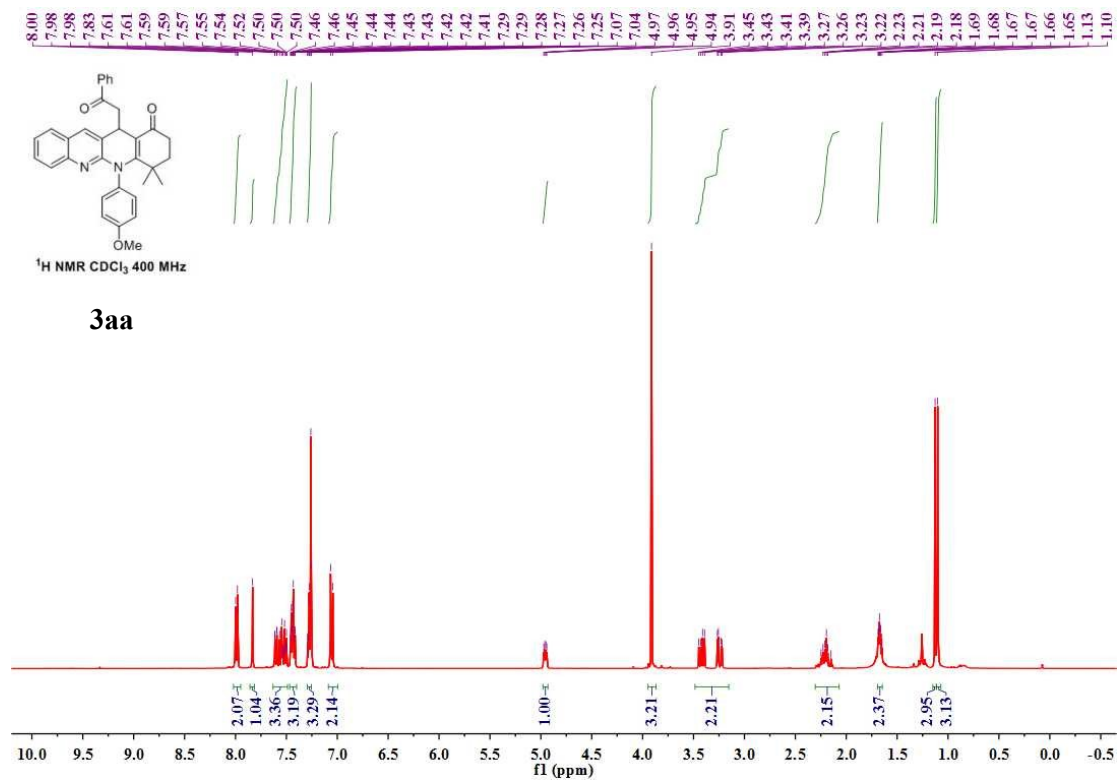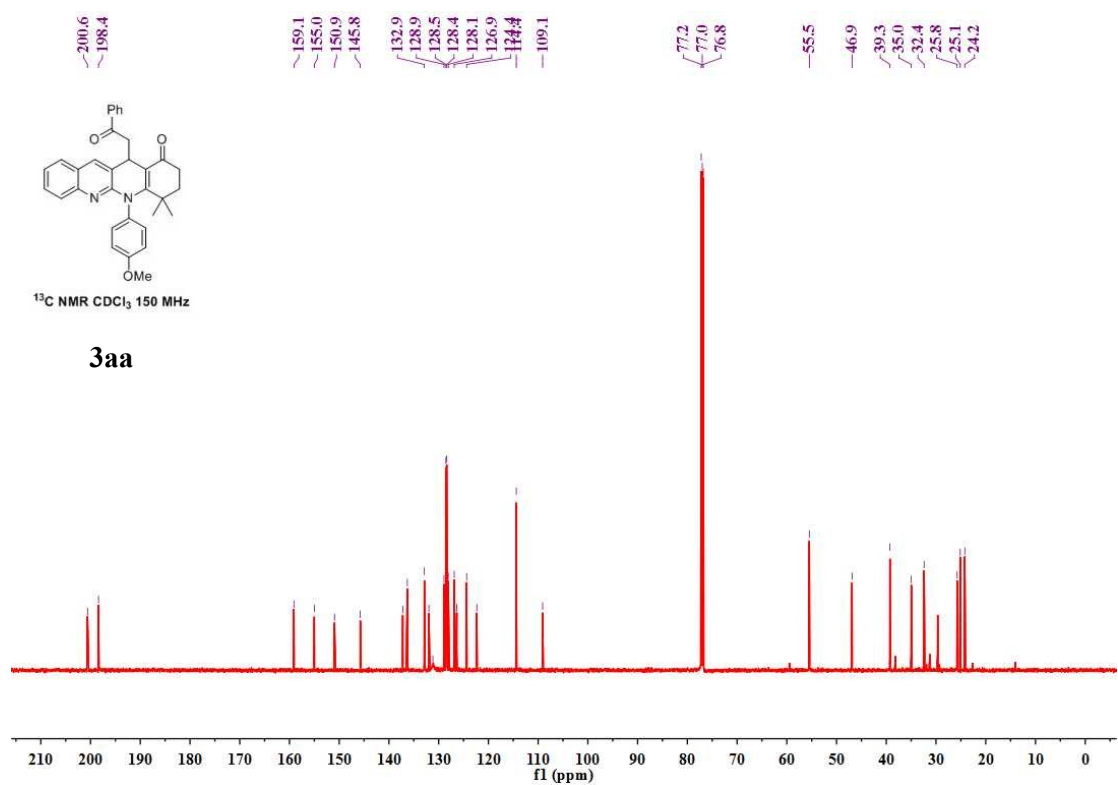



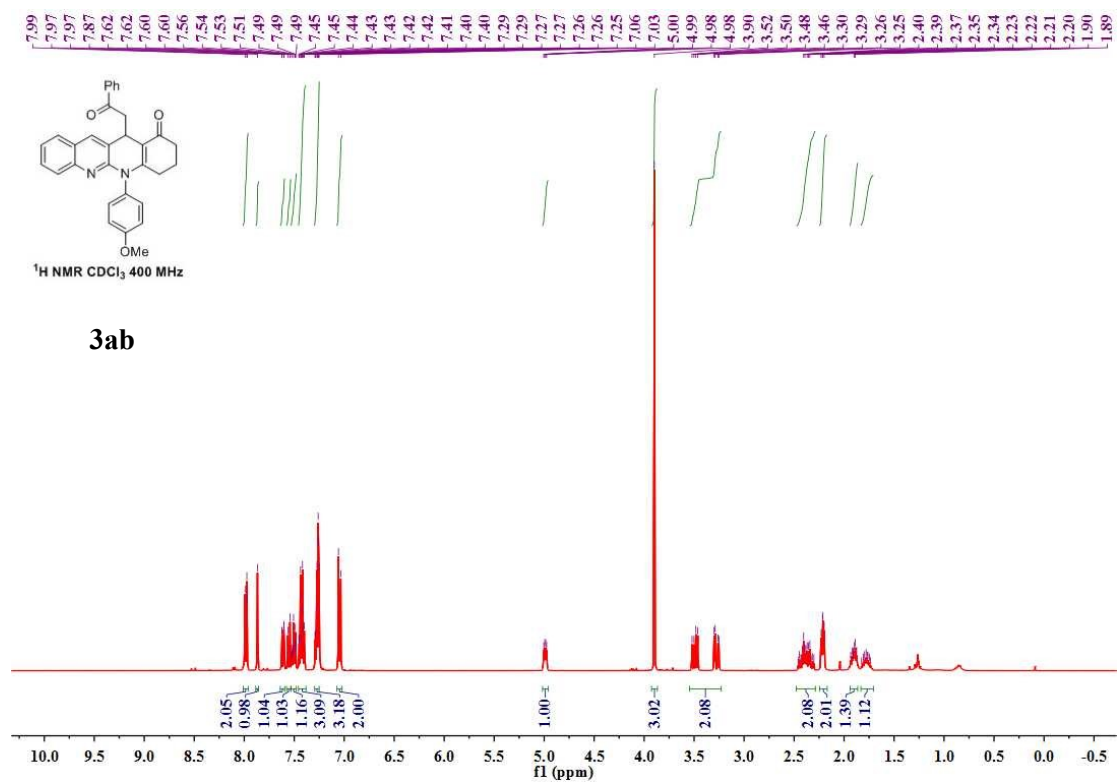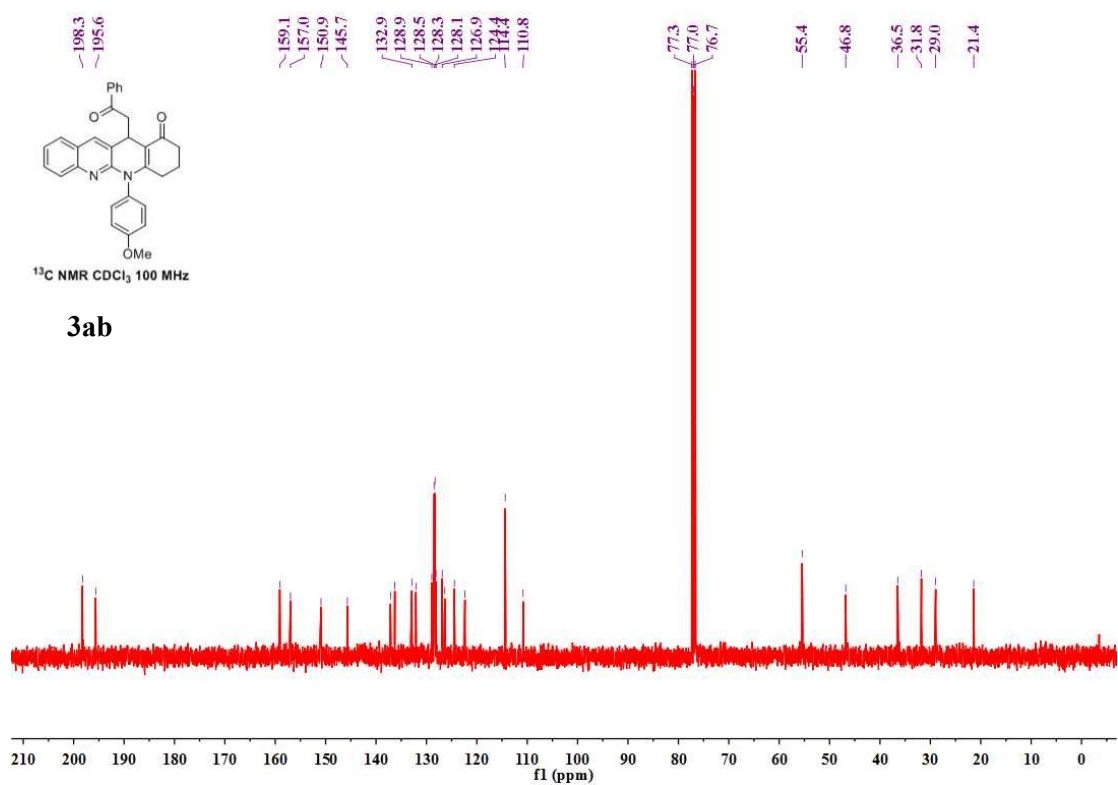



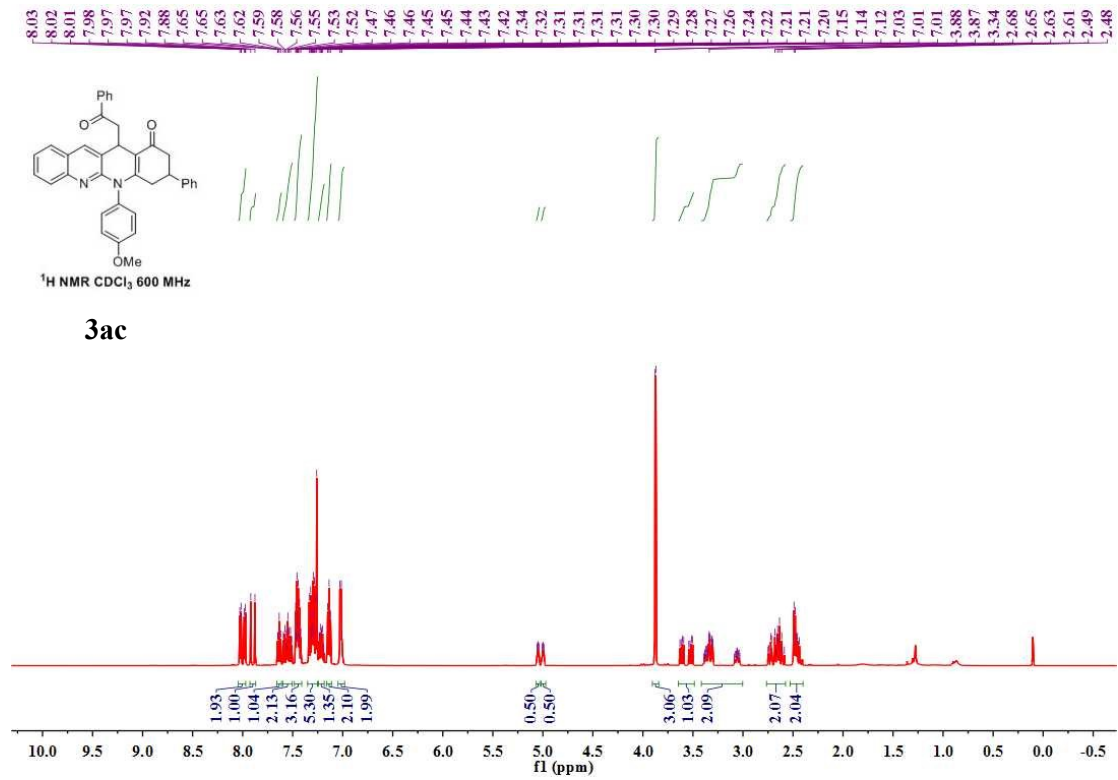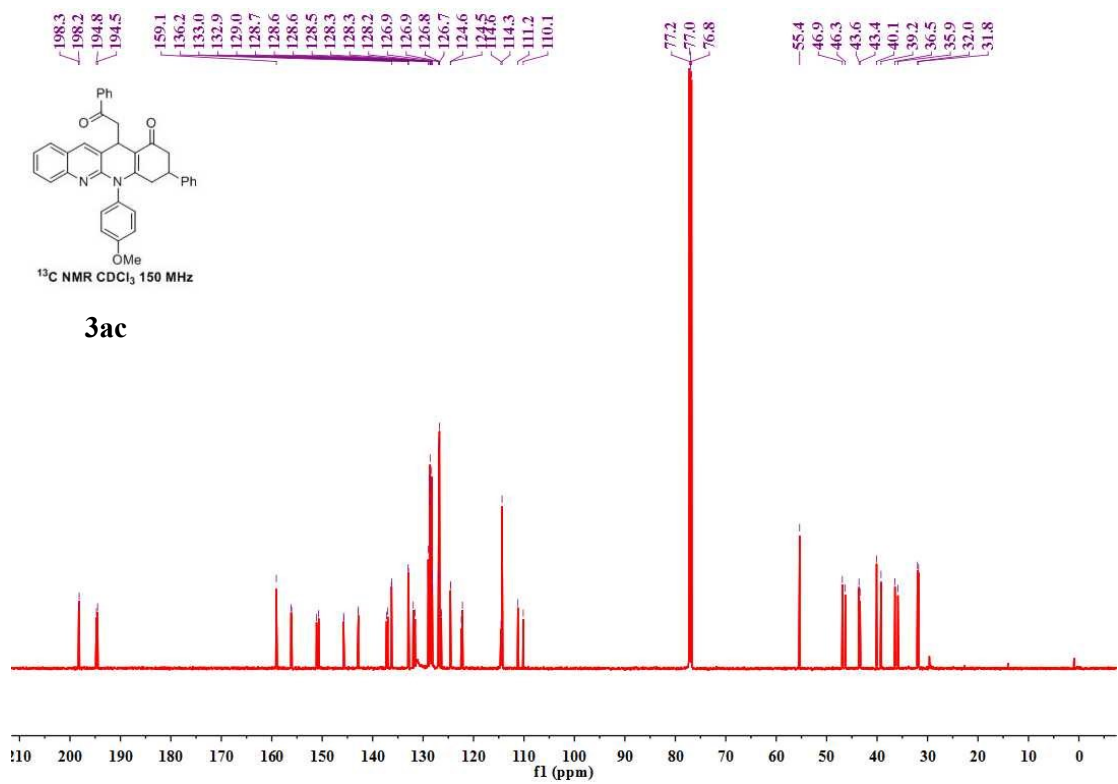

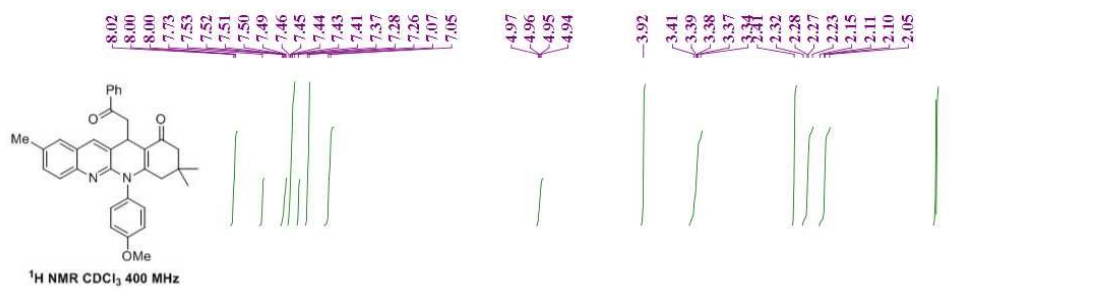

**3ad**

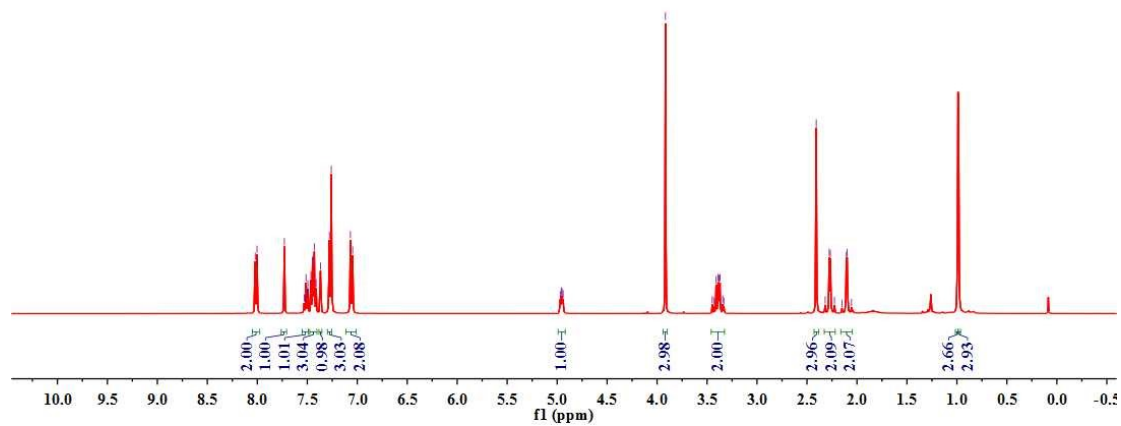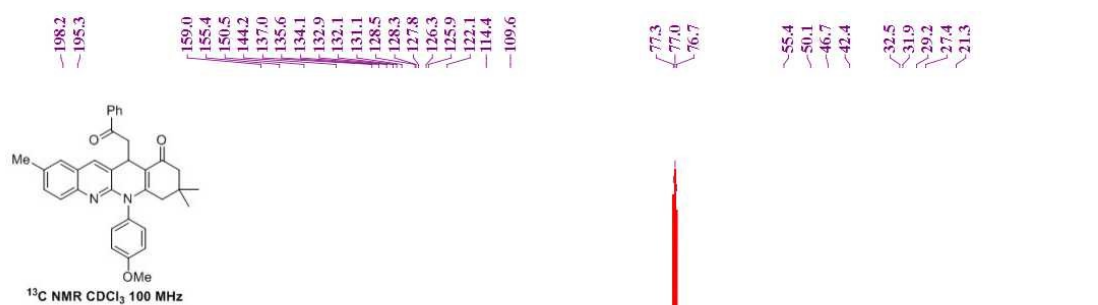

**3ad**

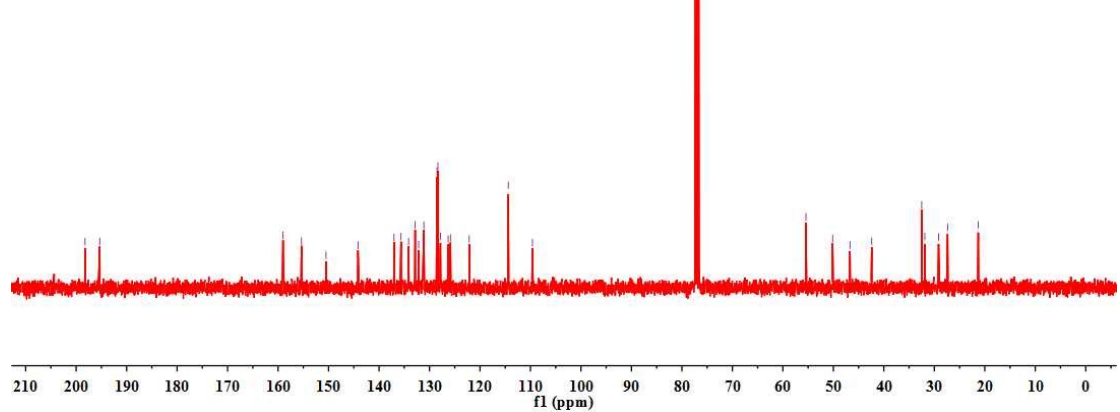

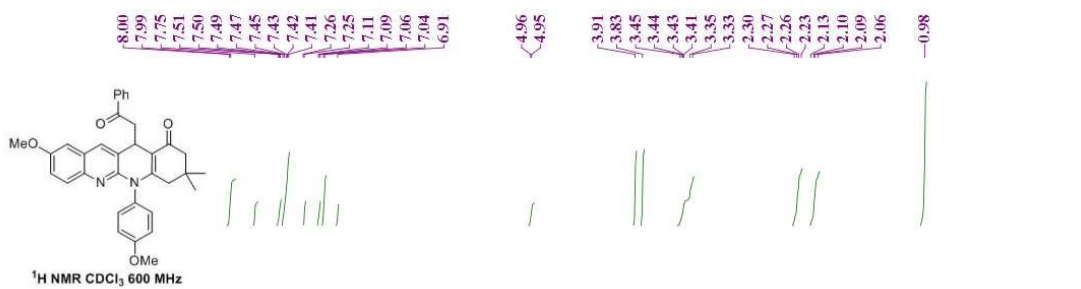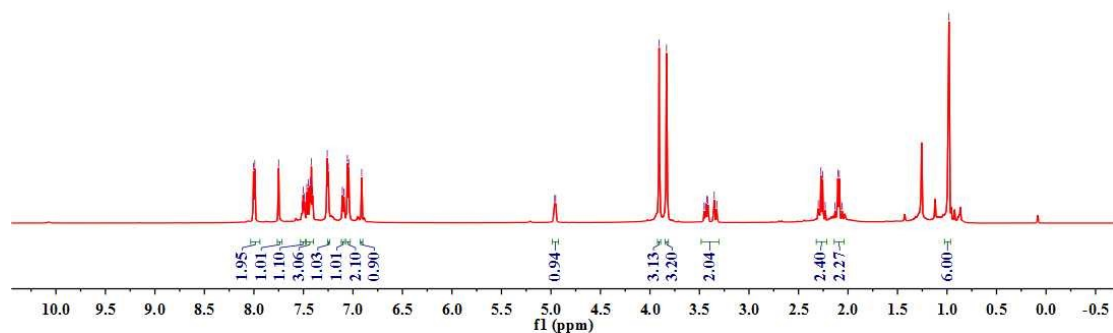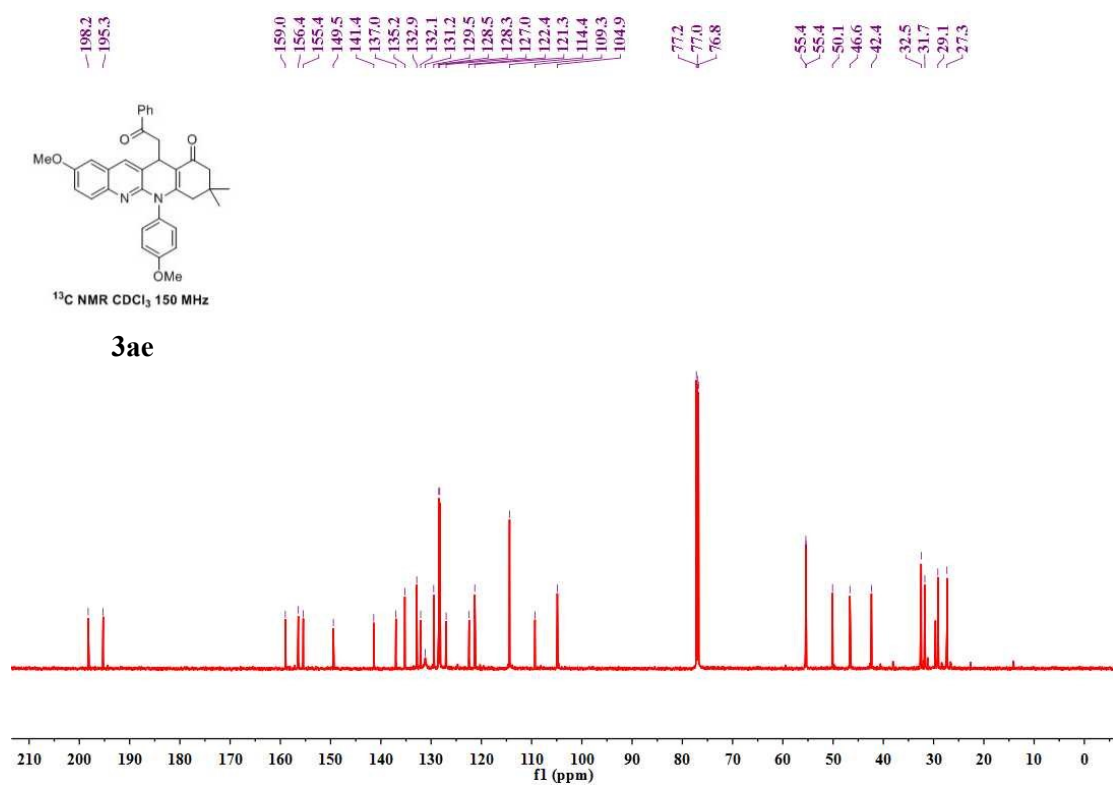

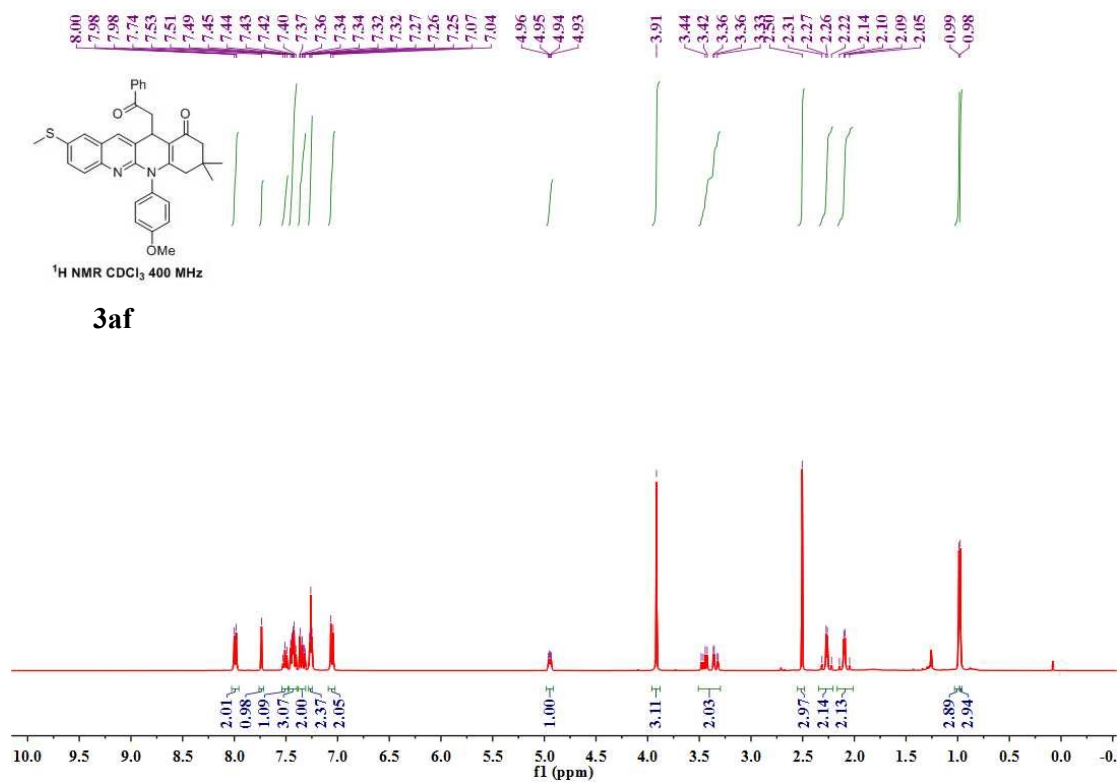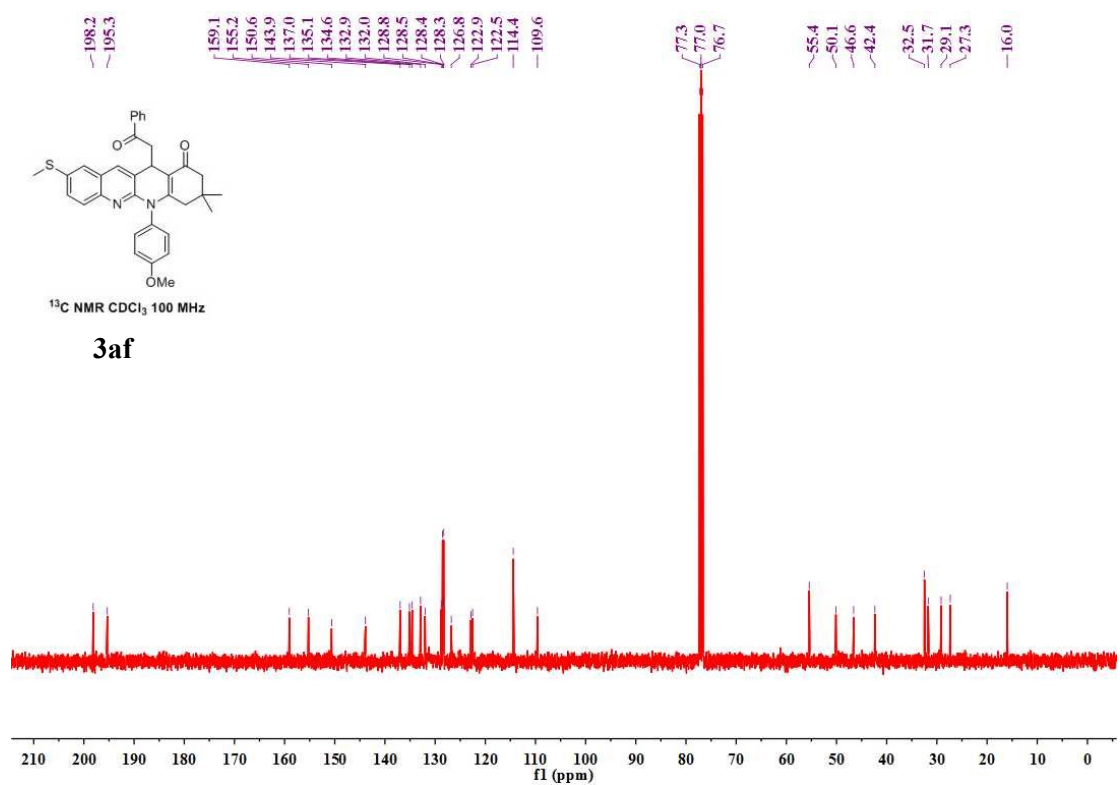

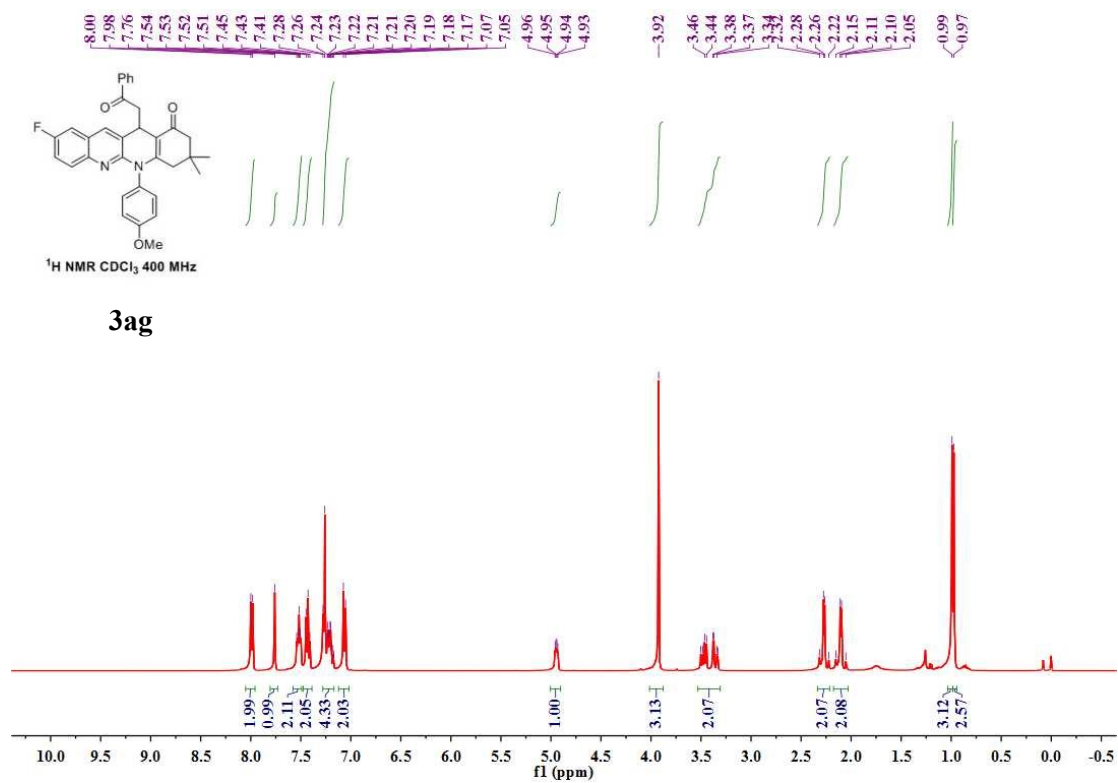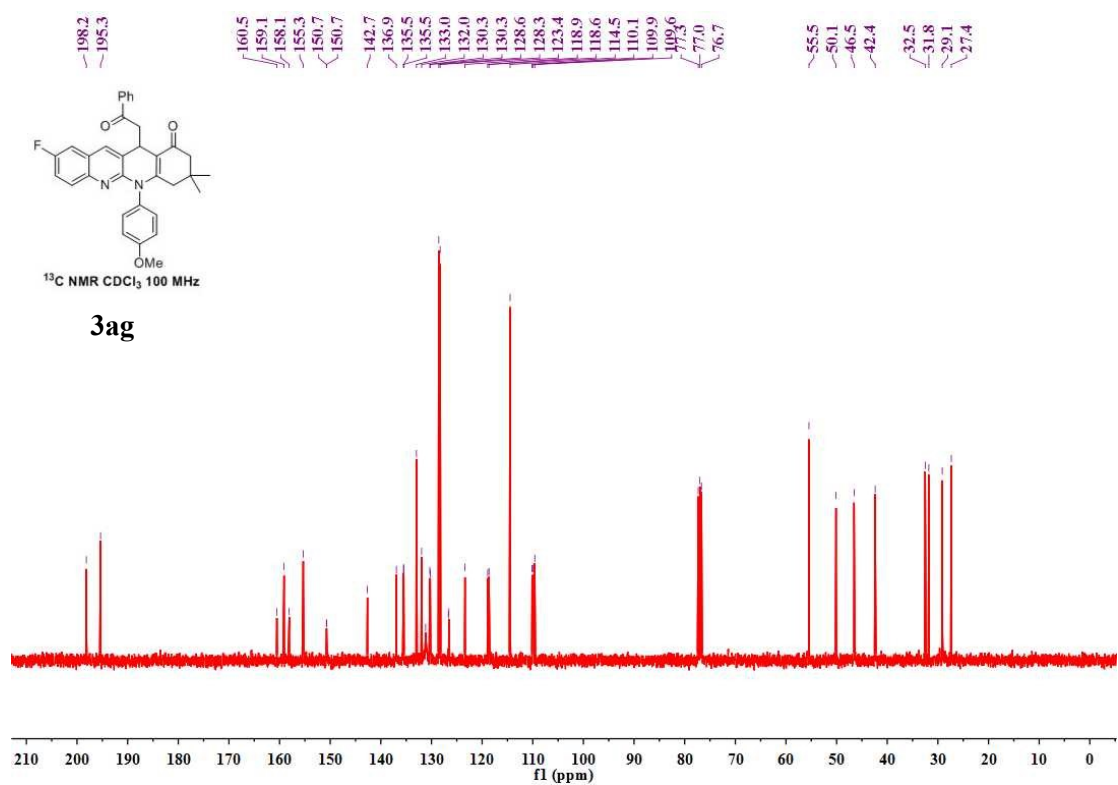

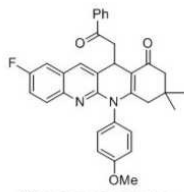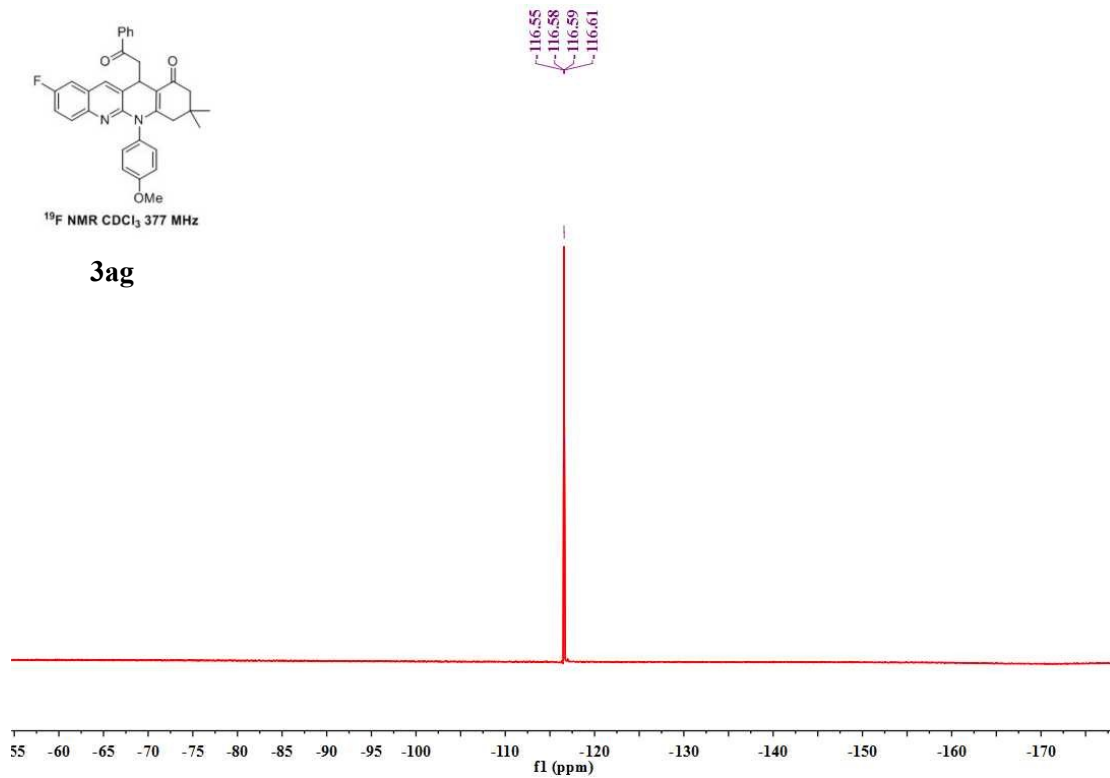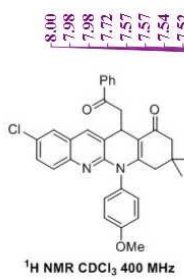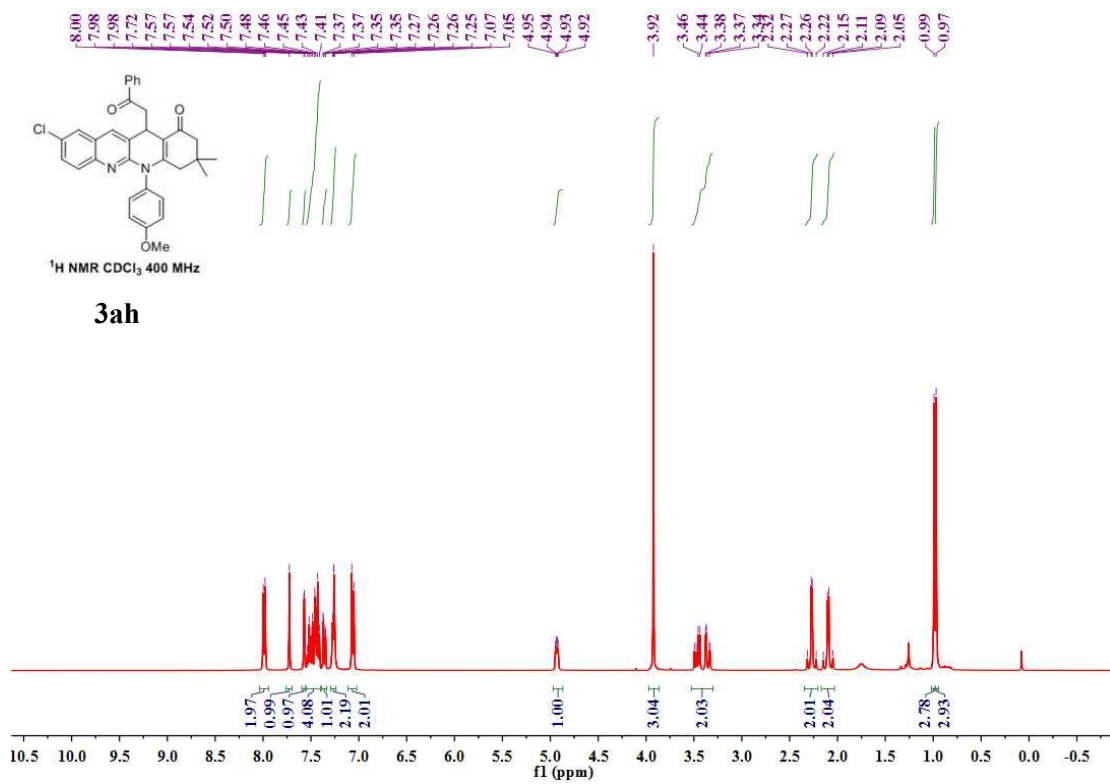

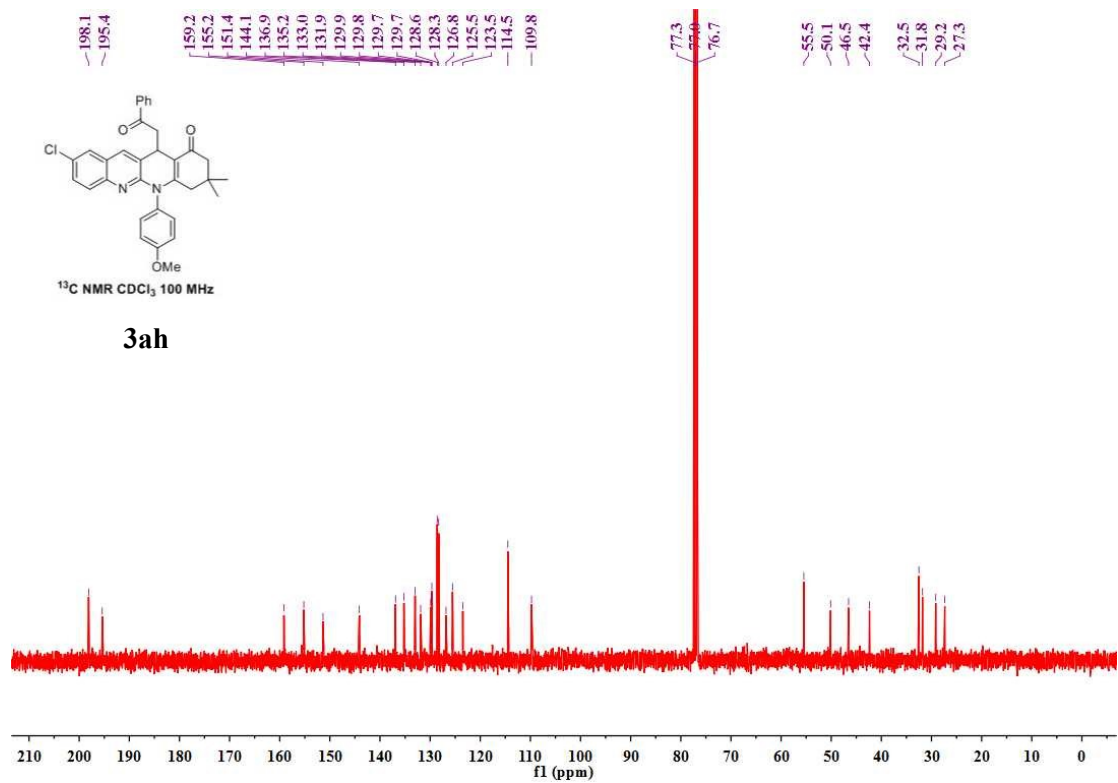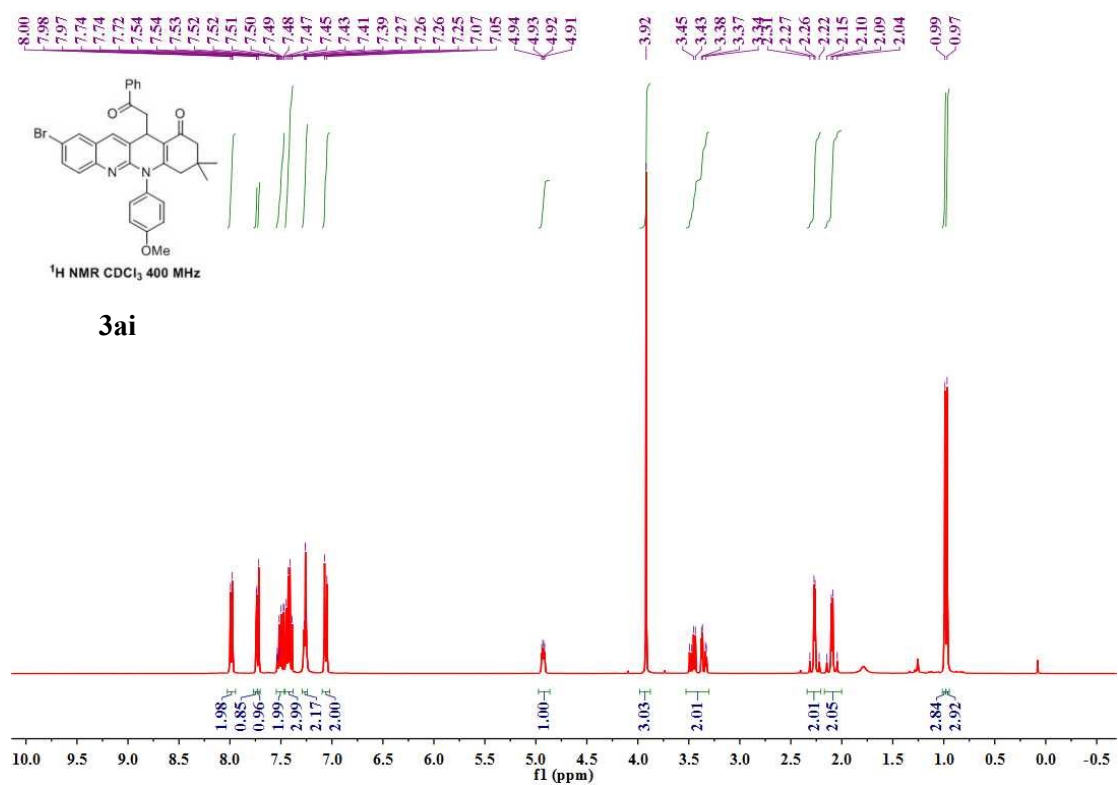

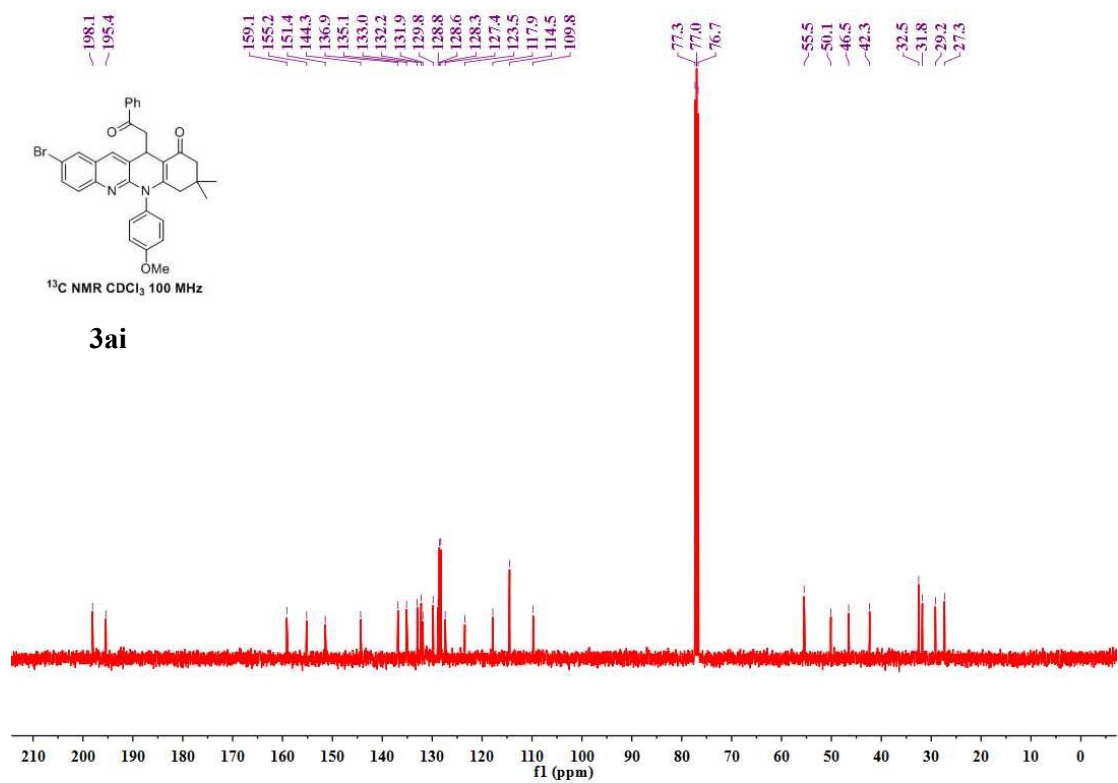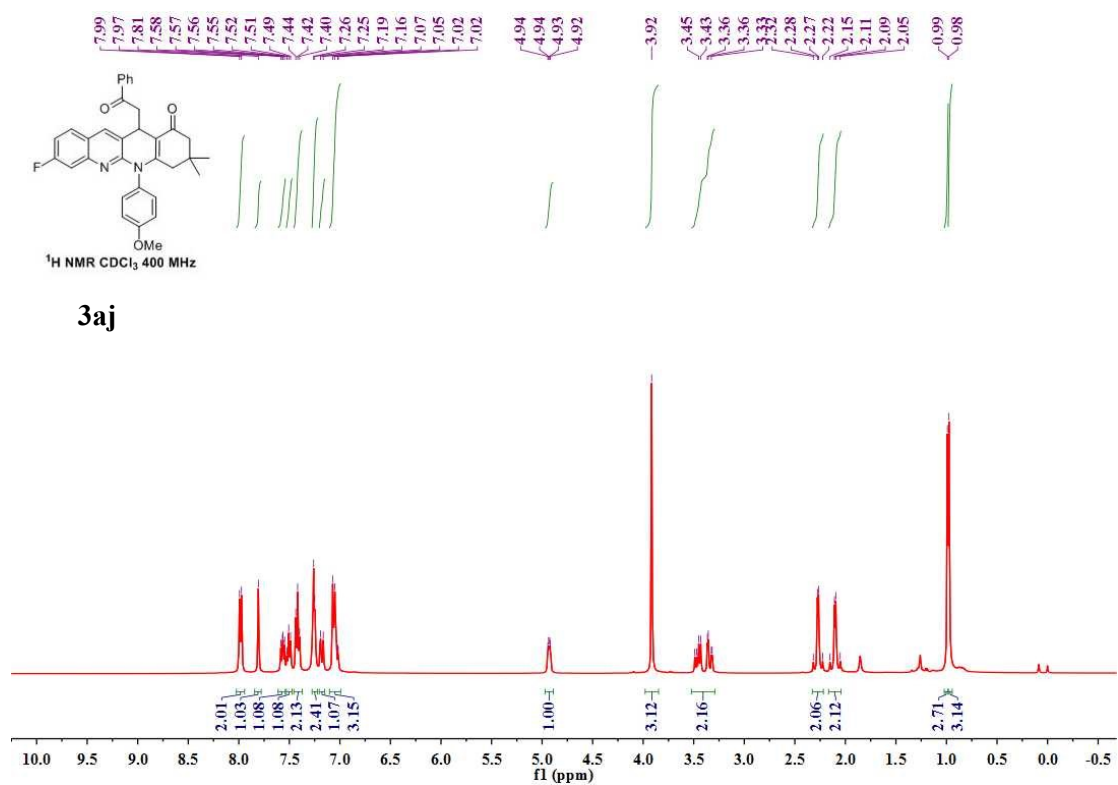



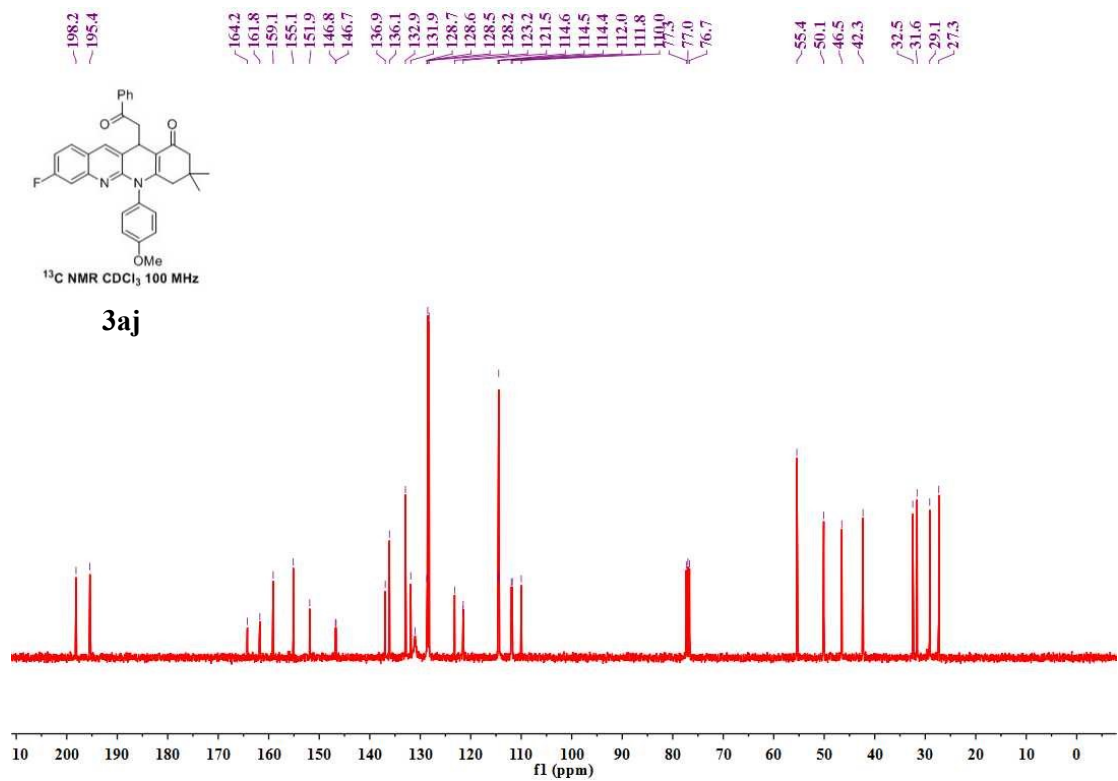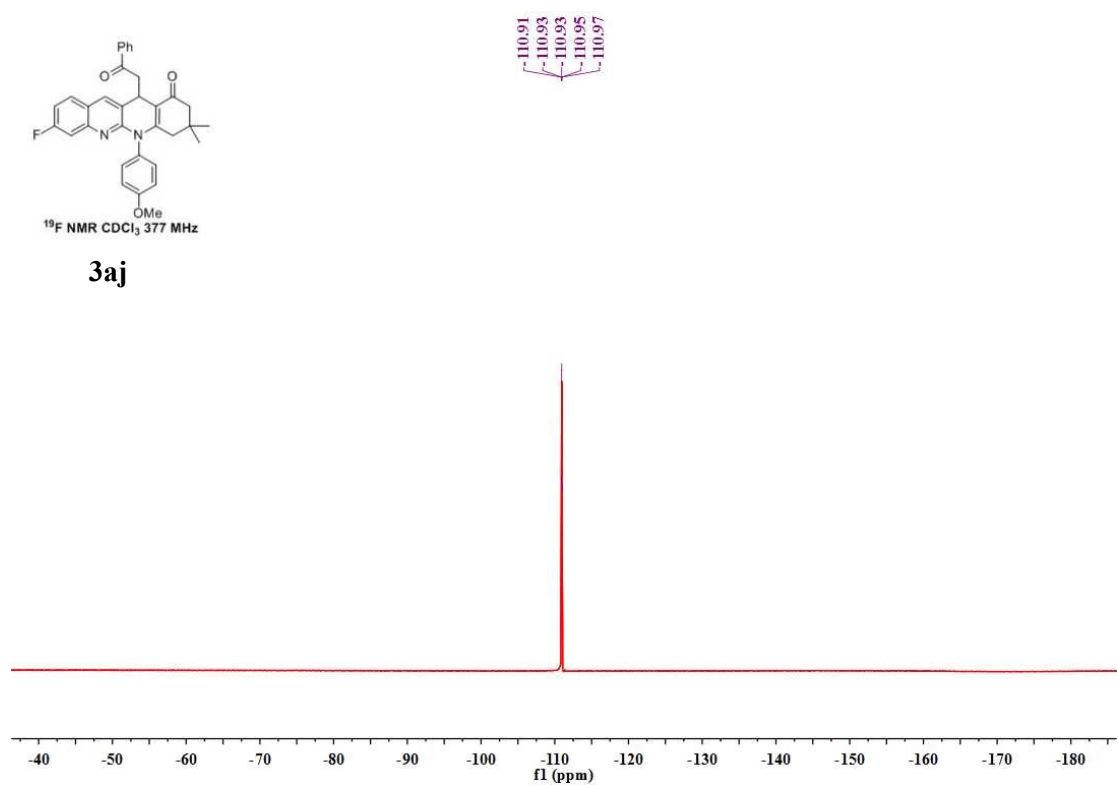

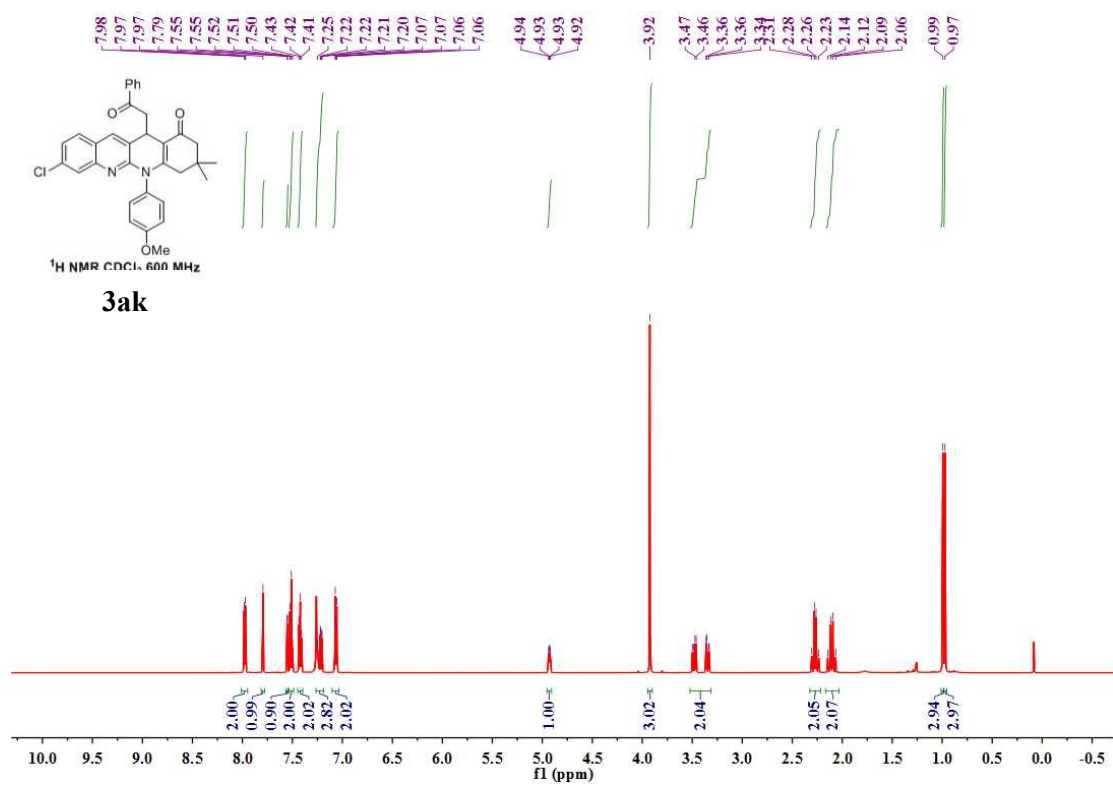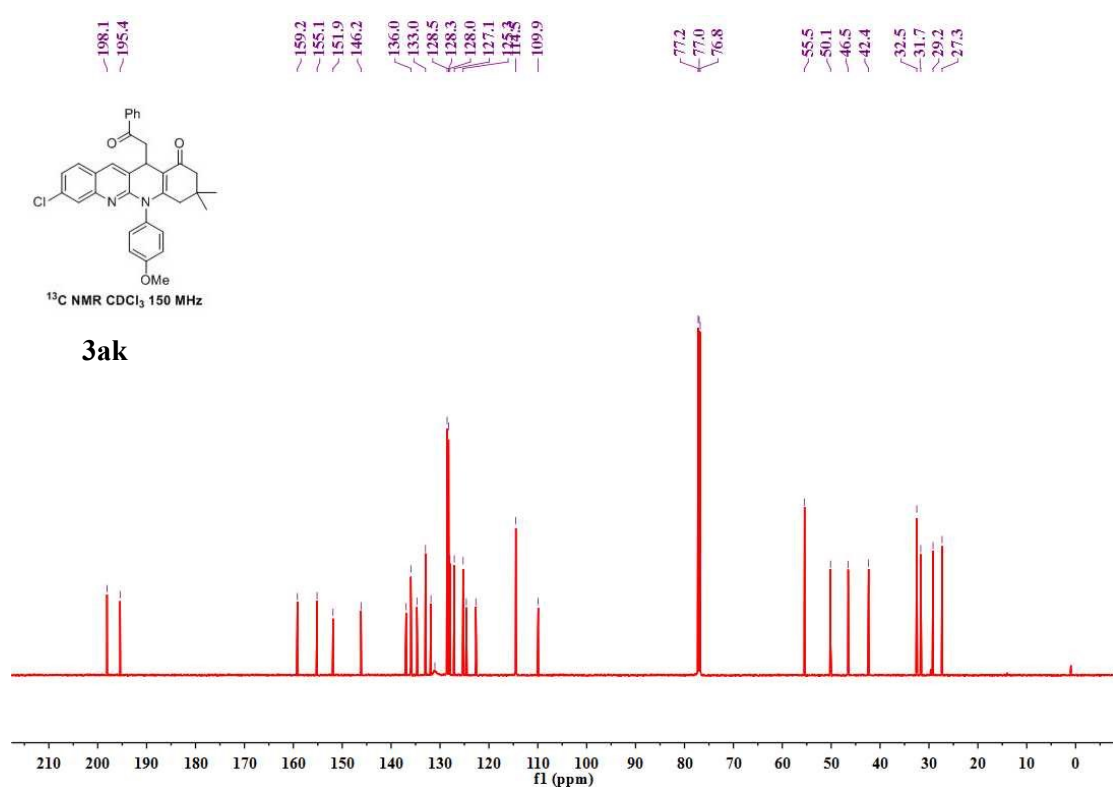

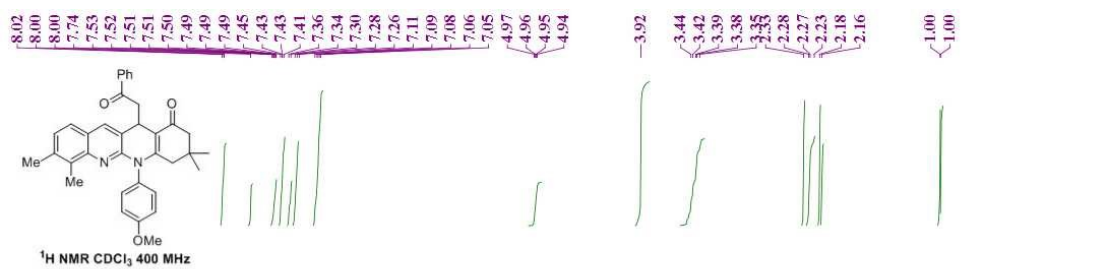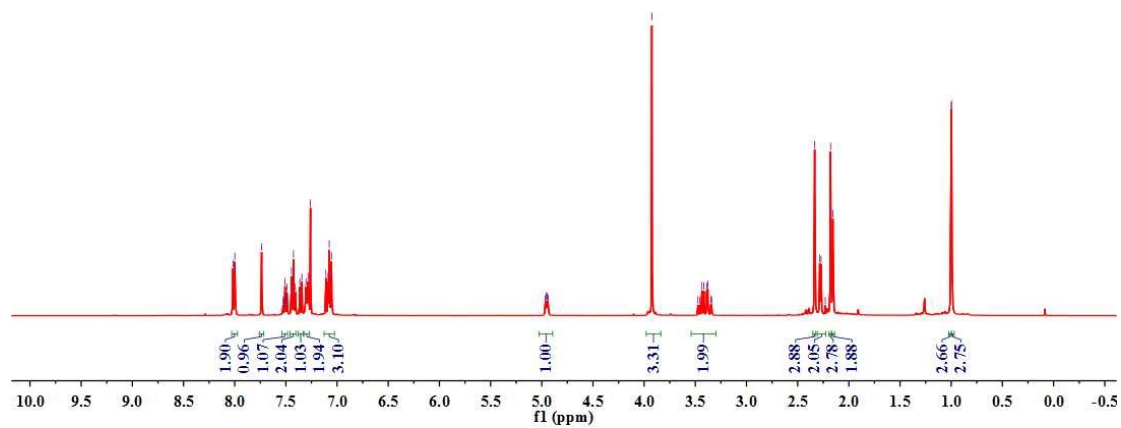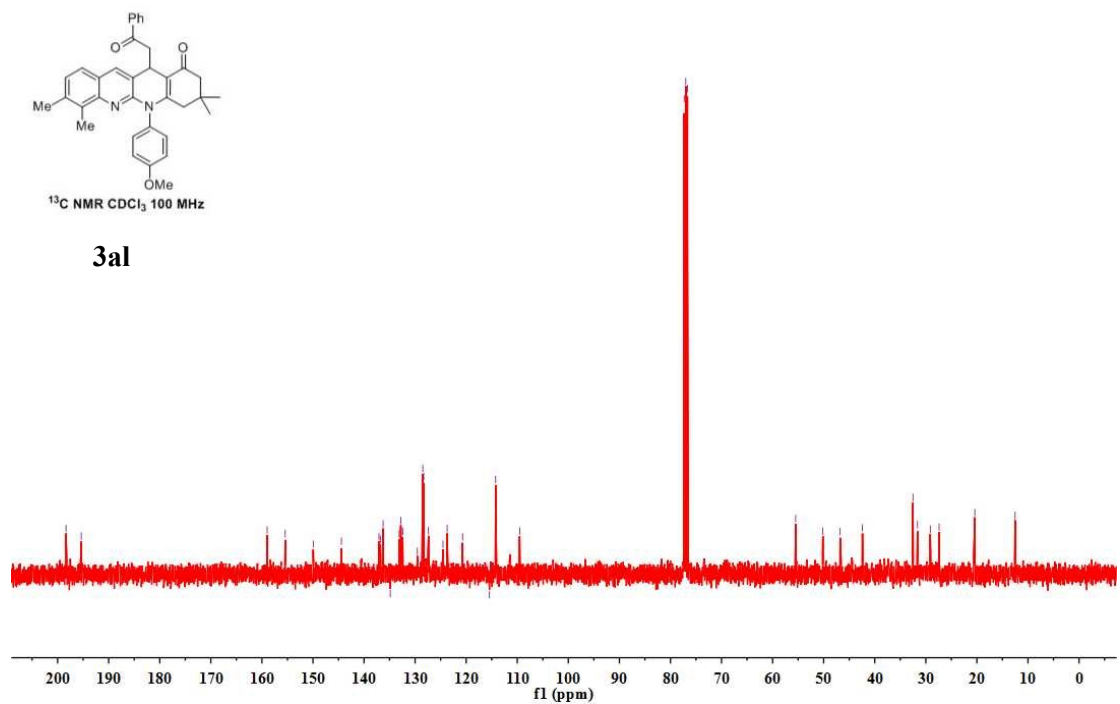

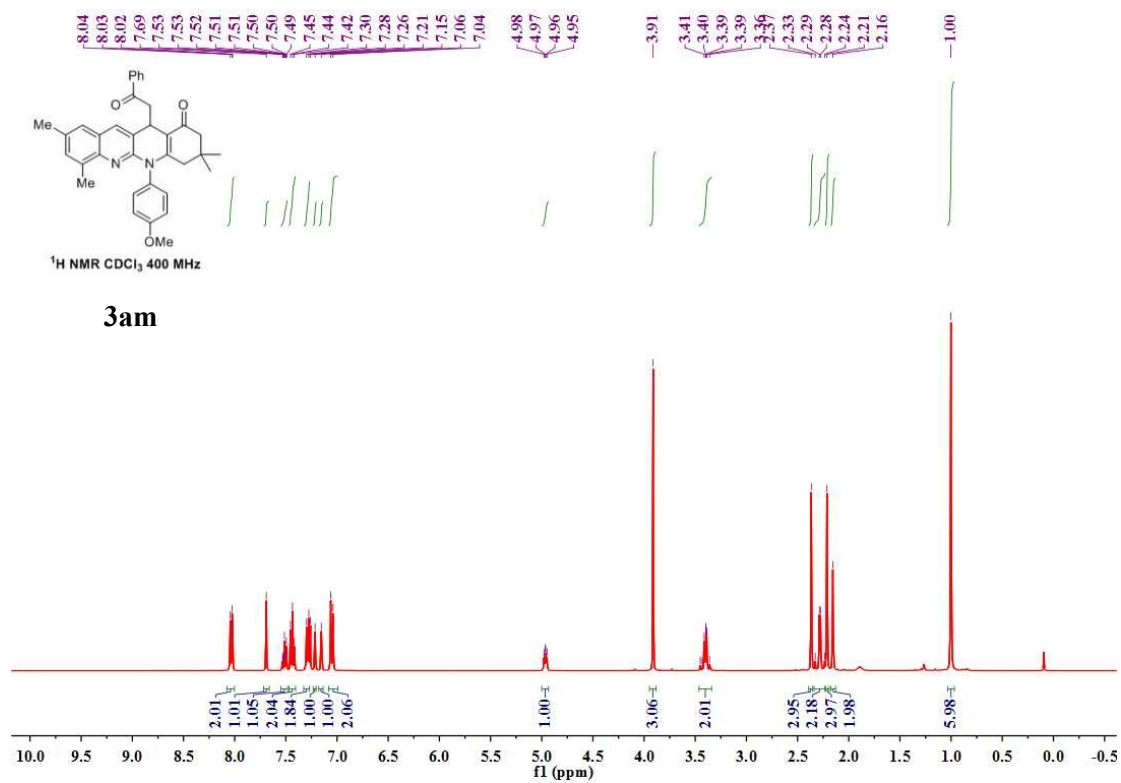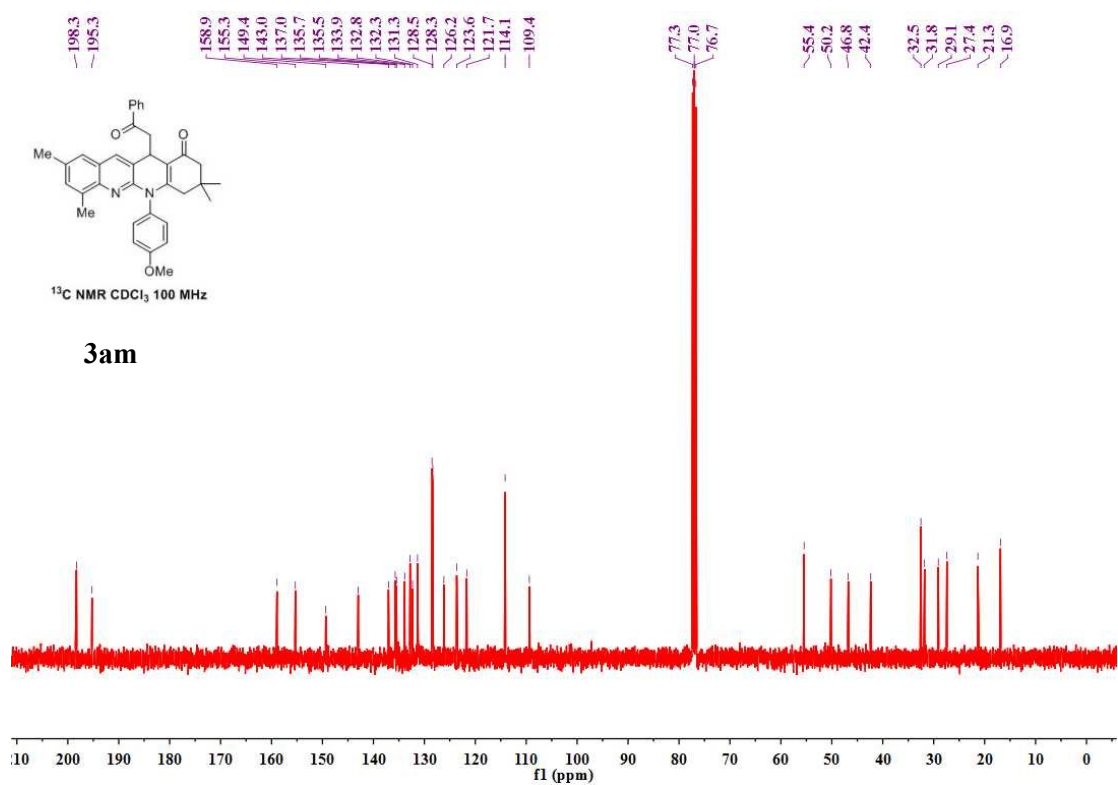

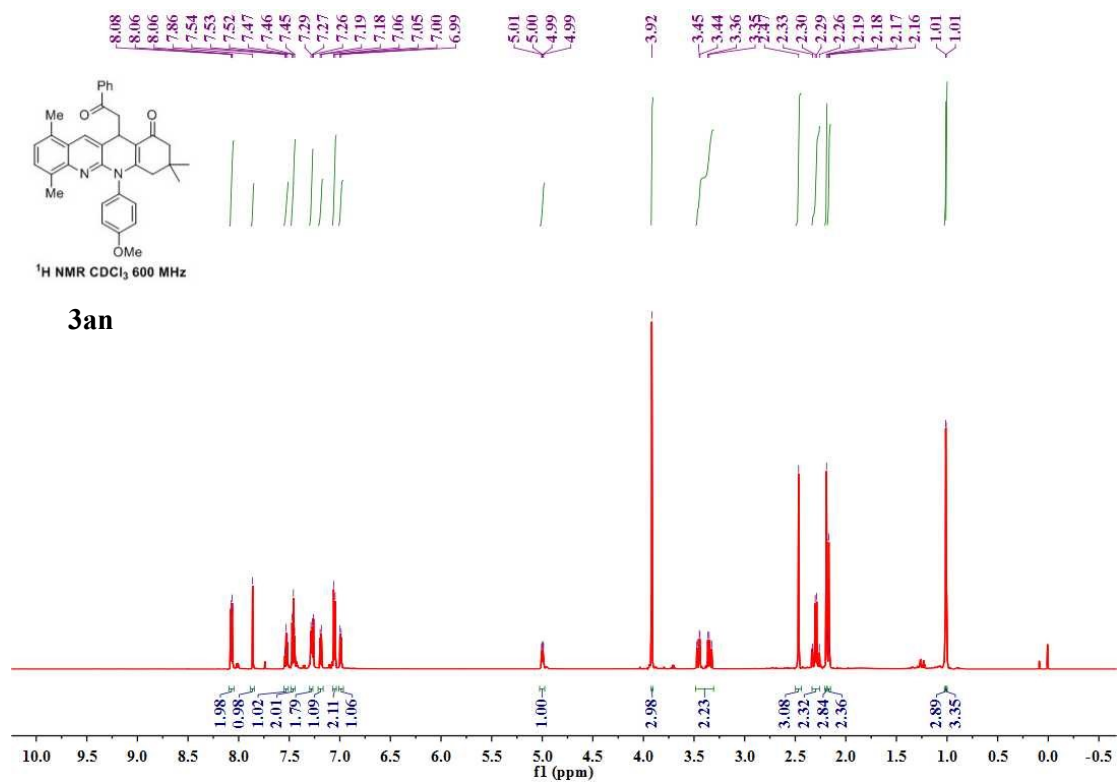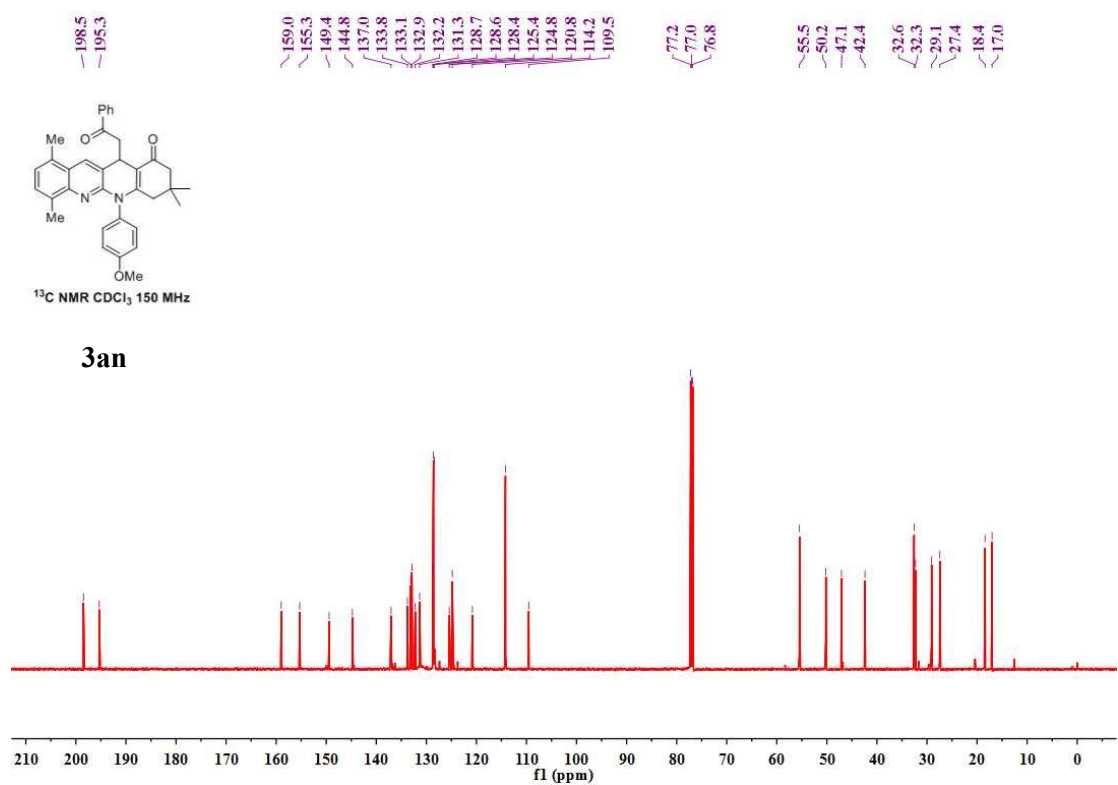

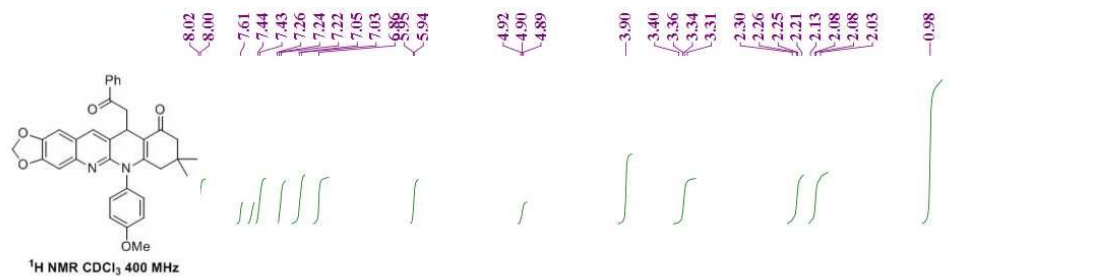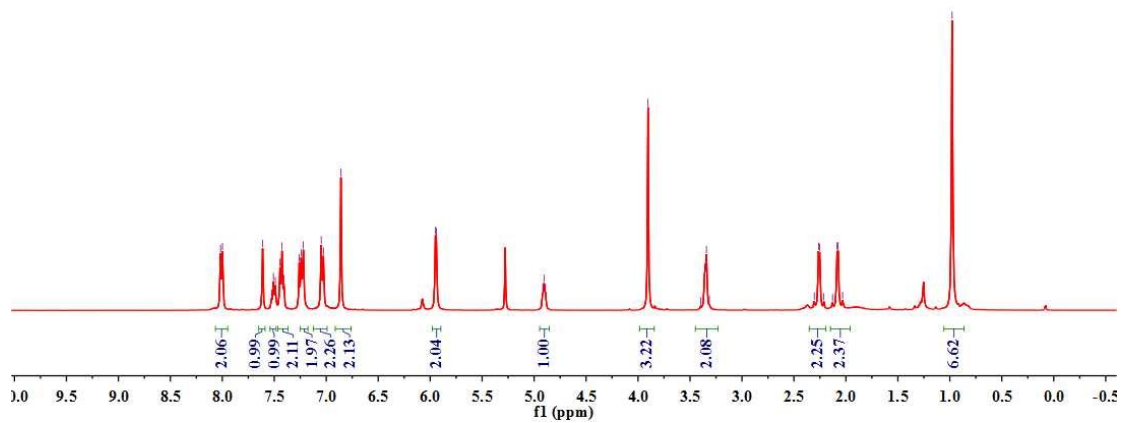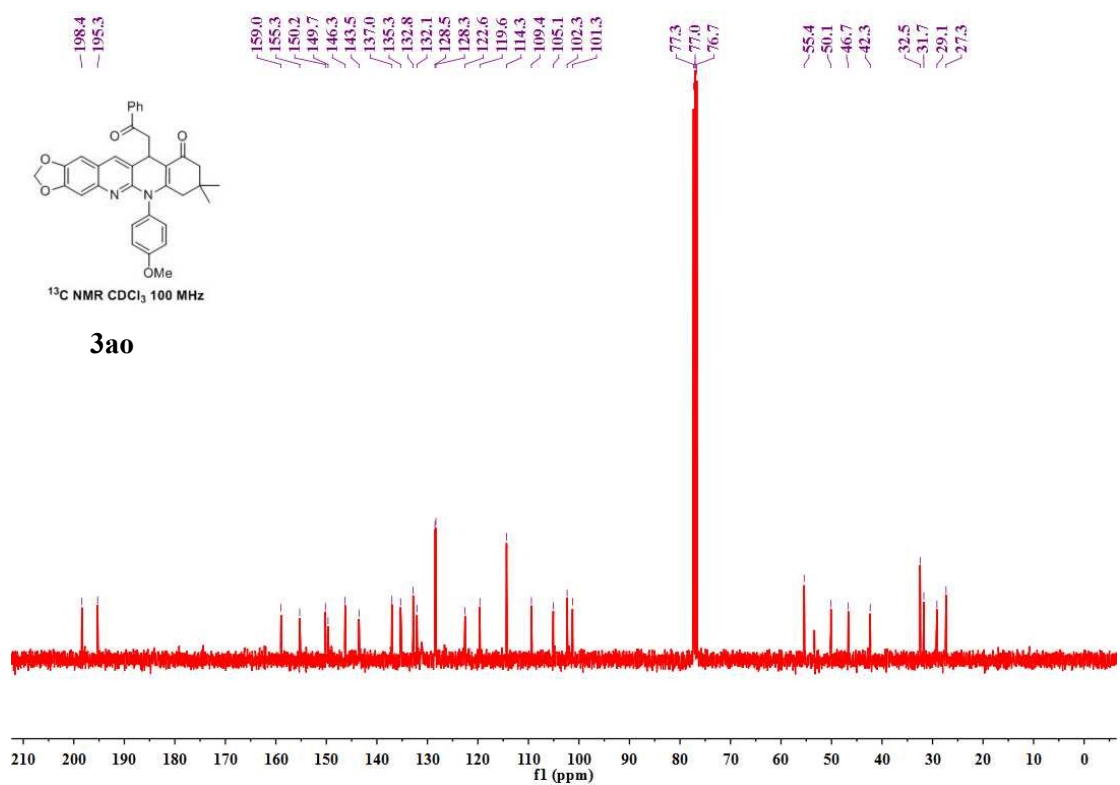

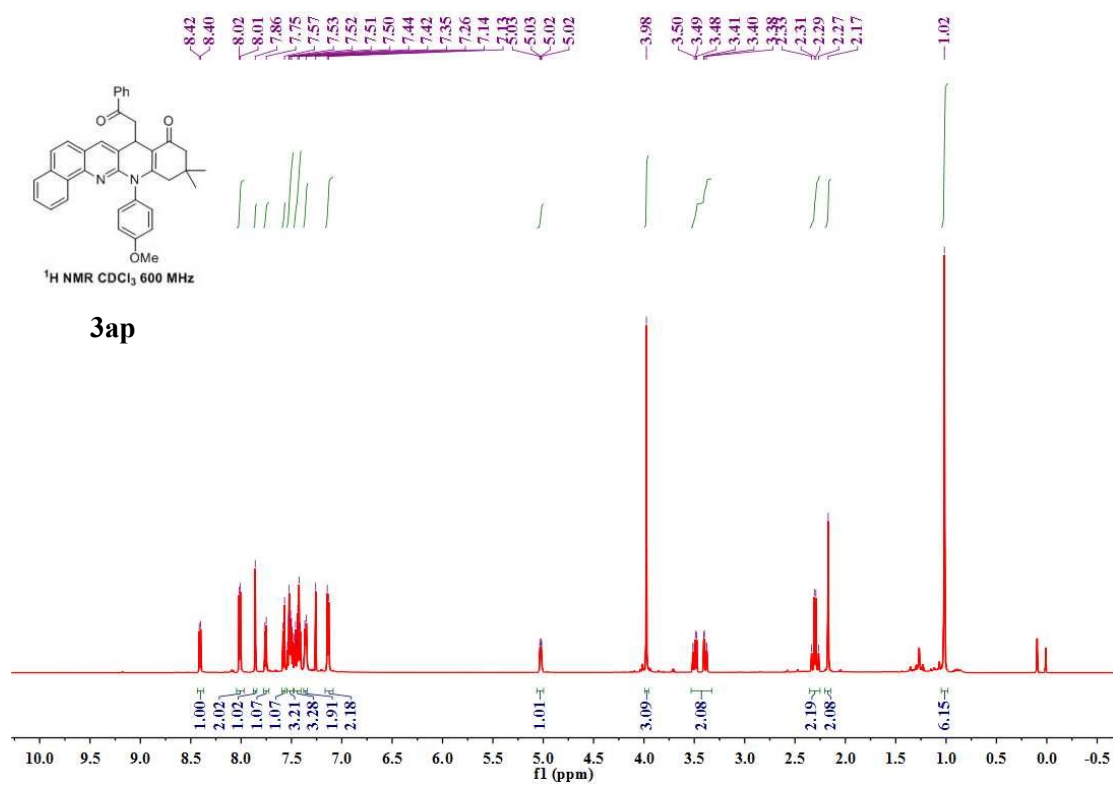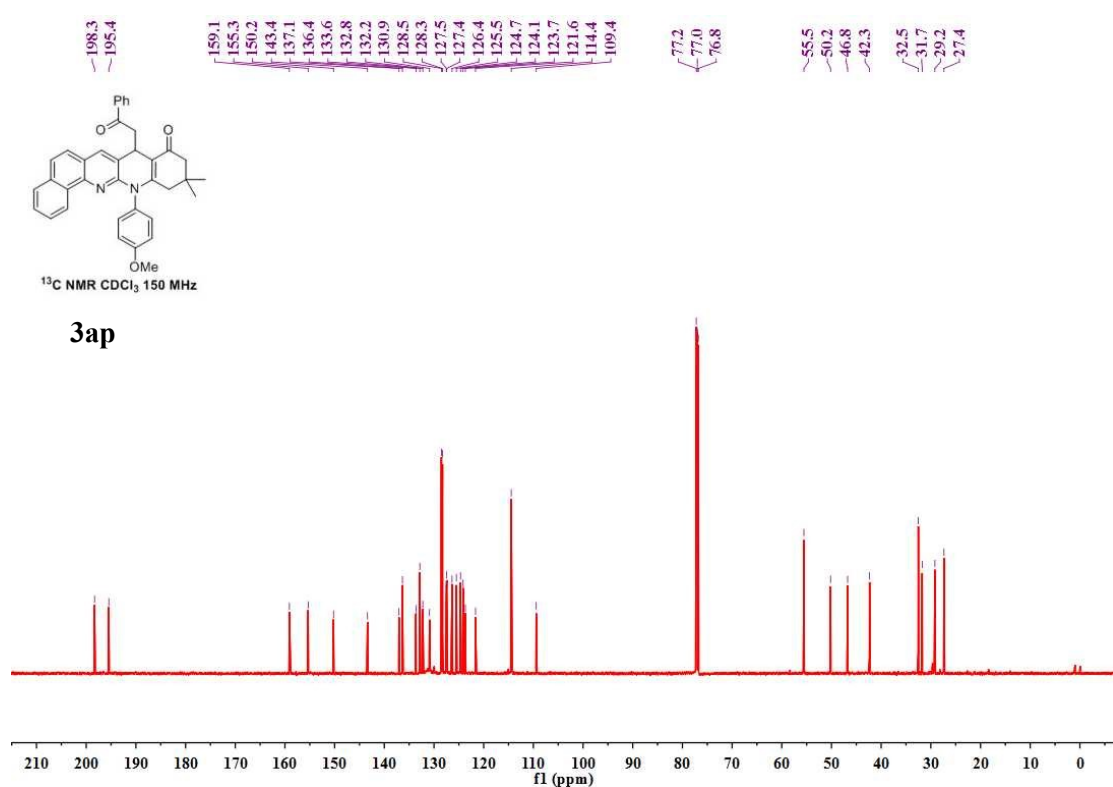

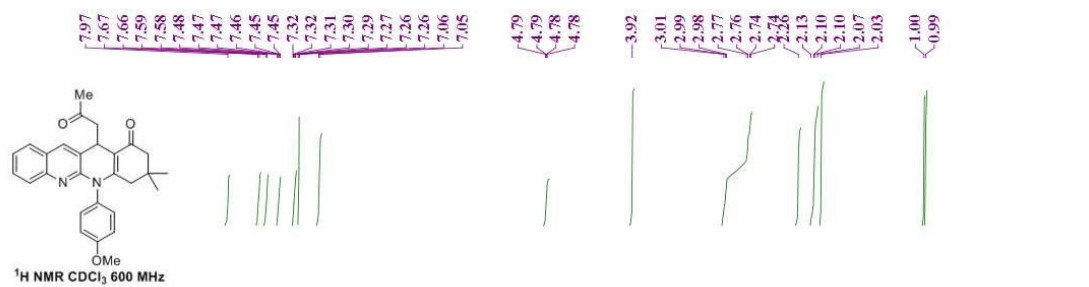

**3aq**

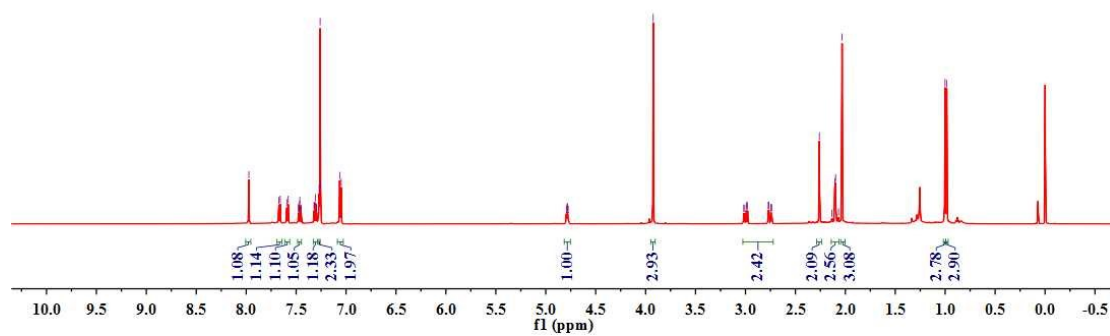

**3aq**

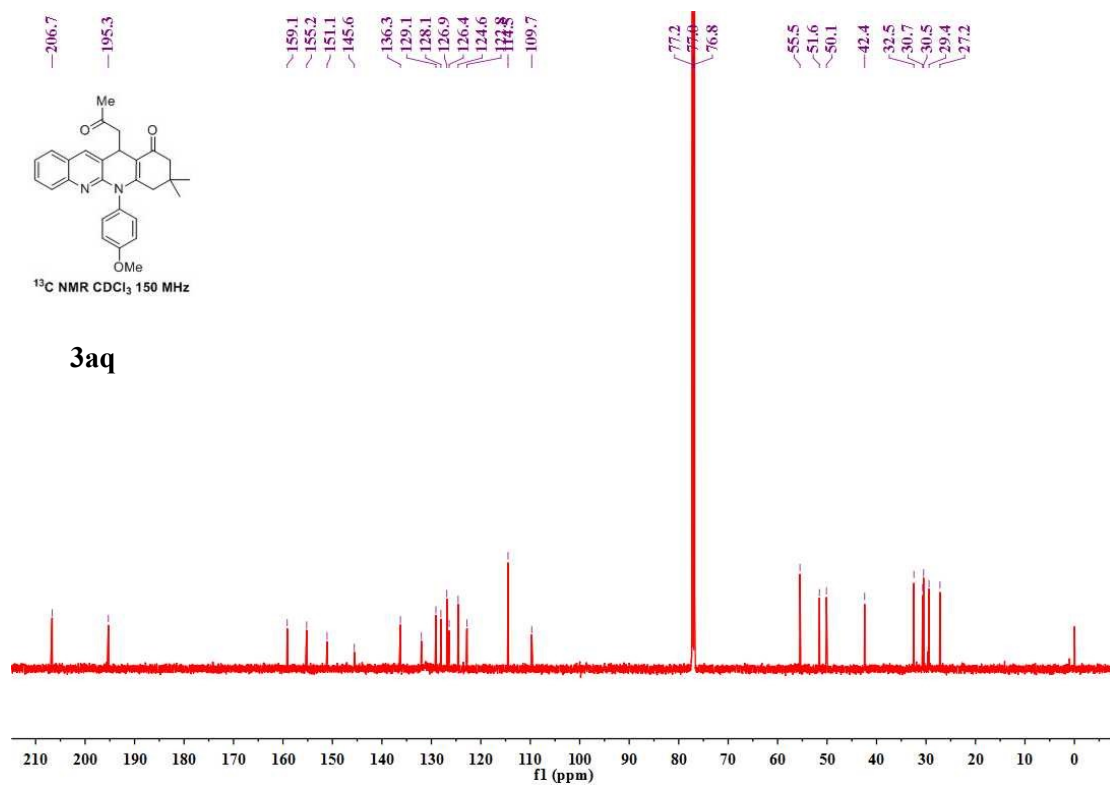



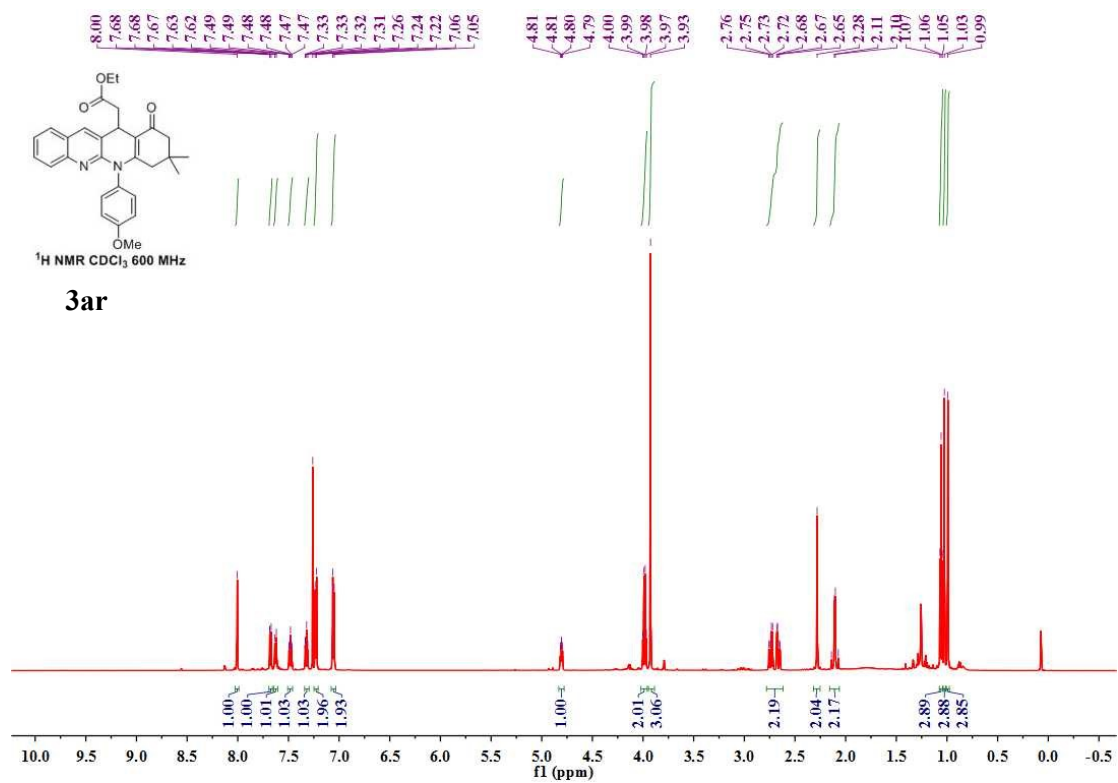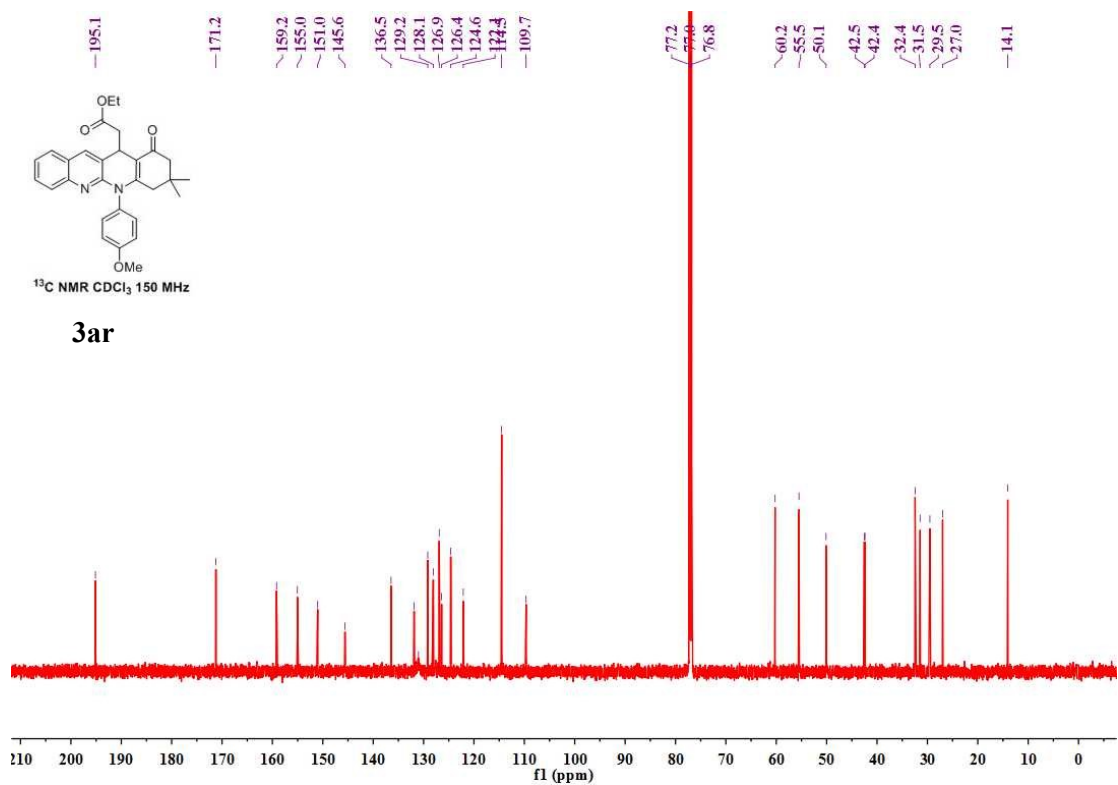

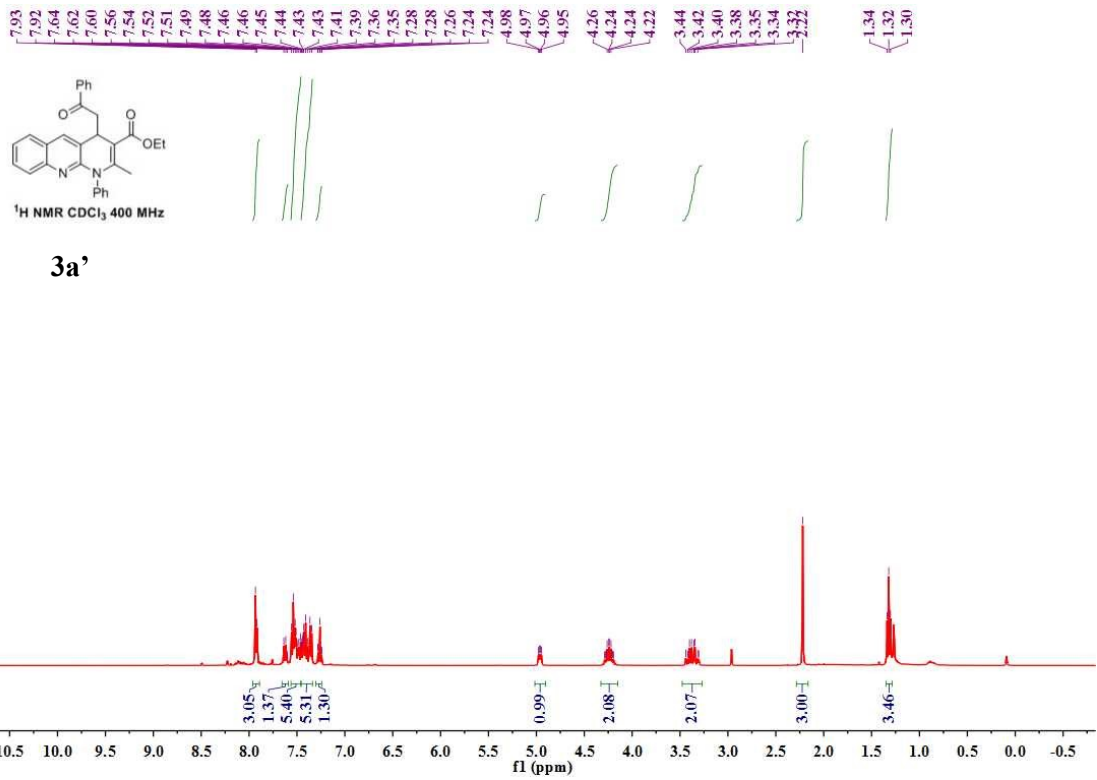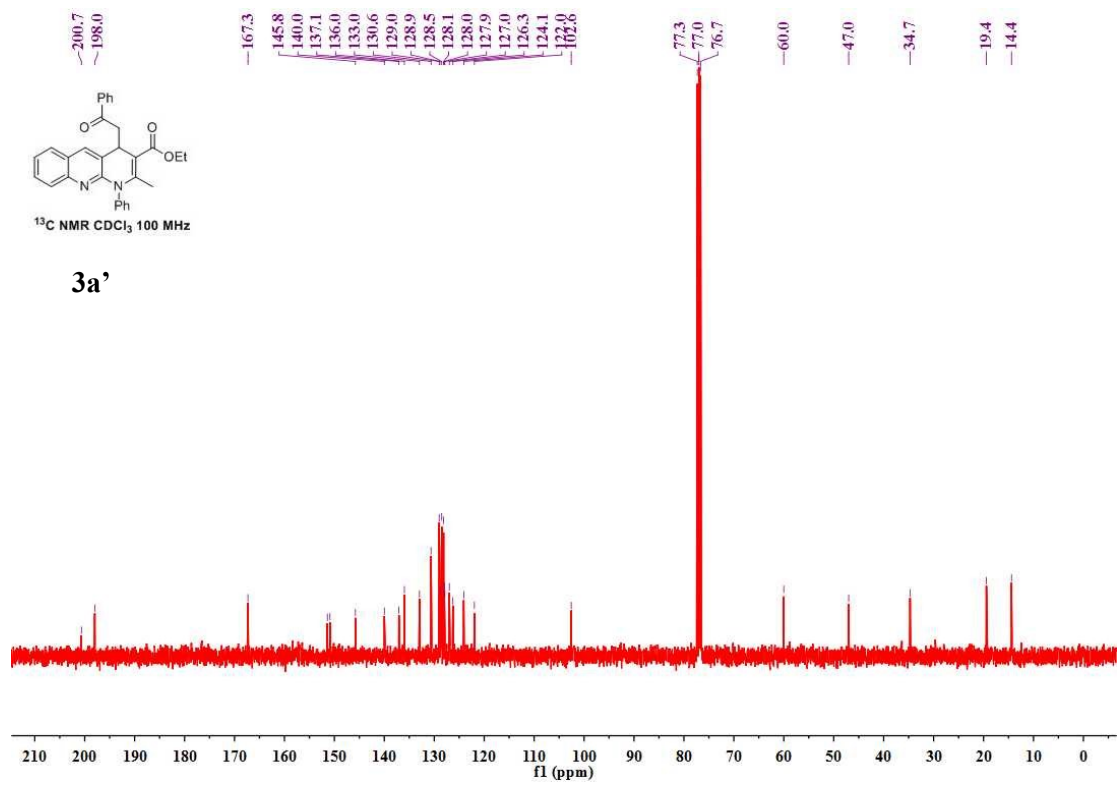

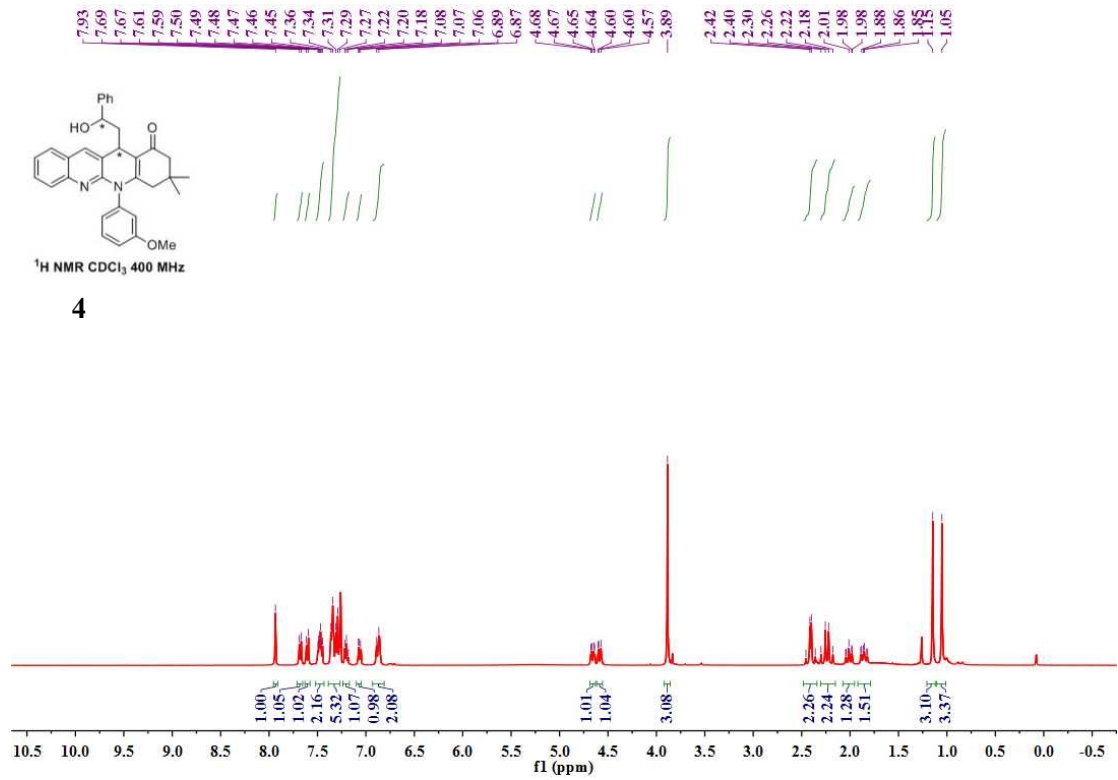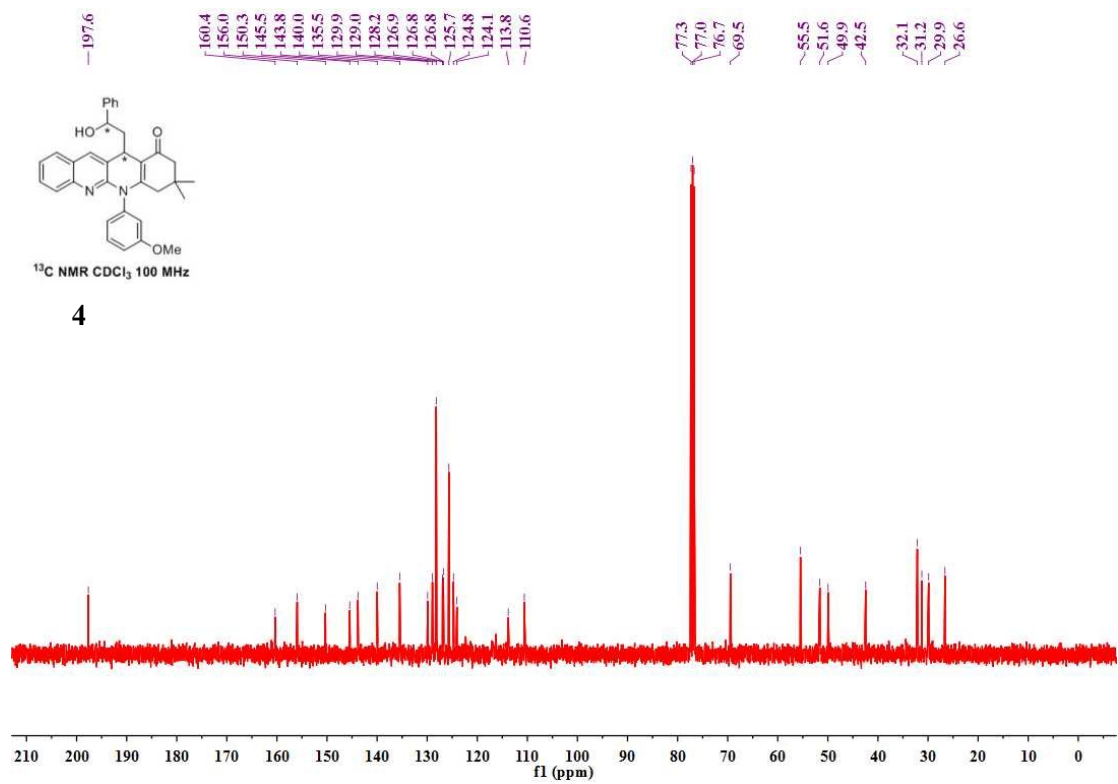

8.11  
7.76  
7.74  
7.63  
7.61  
7.53  
7.52  
7.51  
7.50  
7.49  
7.48  
7.47  
7.47  
7.45  
7.43  
7.38  
7.37  
7.36  
7.34  
7.34  
7.28  
7.27  
7.26  
7.20  
7.19  
7.19  
7.06  
7.05  
7.03  
6.88  
6.86  
6.85  
6.85  
4.78  
4.77  
4.75  
4.74  
4.70  
4.69  
4.68  
4.67  
3.87  
2.31  
2.27  
2.23  
2.19  
2.17  
2.13  
2.07  
2.05  
2.04  
2.03  
2.02  
1.99  
1.98  
1.96  
1.96  
0.98

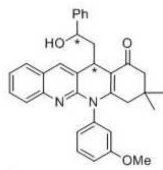

<sup>1</sup>H NMR CDCl<sub>3</sub> 400 MHz

4'

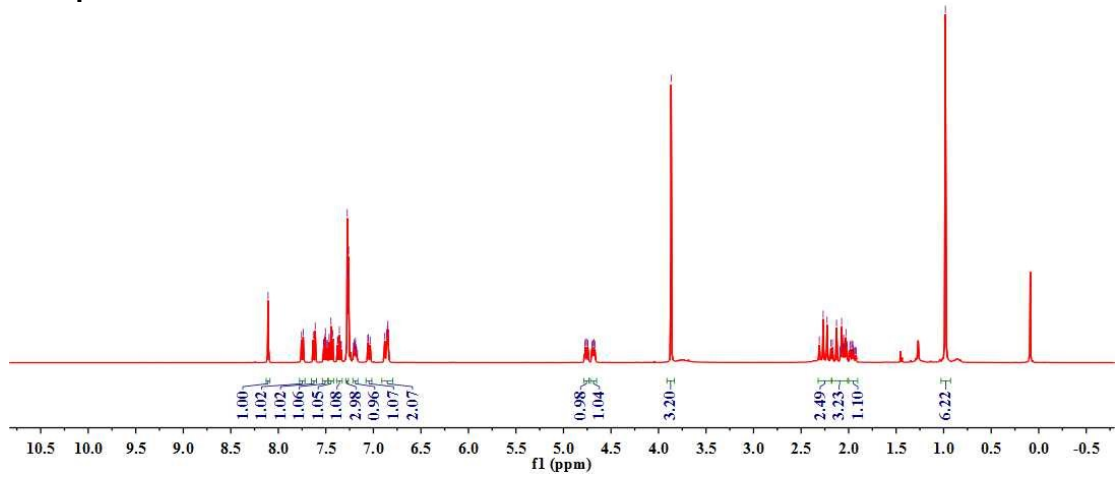

195.9  
160.4  
154.4  
150.4  
145.7  
144.9  
140.2  
136.1  
129.8  
129.0  
128.3  
128.2  
127.1  
126.6  
125.7  
124.6  
123.0  
113.9  
111.7

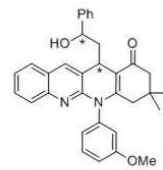

<sup>13</sup>C NMR CDCl<sub>3</sub> 100 MHz

4'

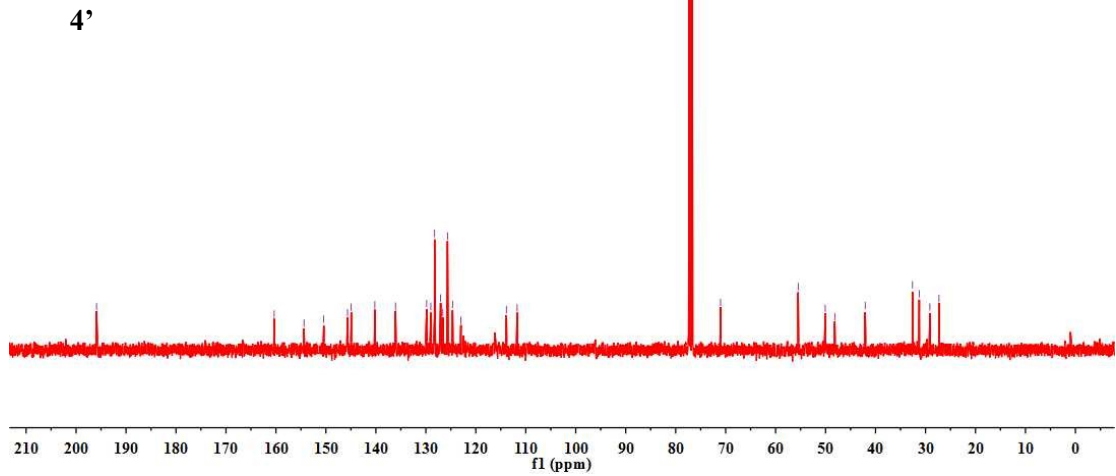

Supplement: d3ob01547e1.pdf [file d3ob01547e1.pdf]
